# Supplementary material
Source: publisher figshare collection journal article supplement (https://gsajournals.figshare.com/ndownloader/files/22406100)
Supplement: Supplementary file 1 [file 22406100]

## Sheet: Sheet1
Accession ID	sample name	Taxon	plant name	EV1	EV2	EV3	EV4	Group from PCA	Structure_all	Structure_hierarchy	Group from DAPC	Proposed taxon
-	BM2000	Pyrus communis	BM2000	-0.0172944	0.00934371	-0.00682893	0.0254014	Communis	Occidental	Admixed	P. communis E	Pyrus communis hybrid
PI 256000	CIGC_28.001	xSorbopyrus (intergeneric hybrid)	Pollwiller Pear	-0.0053625	0.0104477	-0.00387801	-0.00239815	Intergeneric	Occidental	Admixed	P. communis A
PI 689459	CIGC_9.001	×Pyronia	Pyronia veitchii	-0.00619267	-0.000342177	0.00140126	-0.00870464	Intergeneric	Occidental	Admixed	P. communis F
PI 542011	CPYR_1.005	Pyrus ussuriensis	P. ussuriensis K-30 (hybrid) - Korea	0.0449383	0.00934138	0.0420416	0.00294025	Group4	Oriental	Admixed	-	Pyrus pyrifolia/ussuriensis hybrid
PI 260195	CPYR_10.004	Pyrus communis	Abbe Fetel (Abate Fetel)	-0.0212988	-0.0188302	0.00505032	-0.00900188	Communis	Occidental	Admixed_Communis	P. communis J
PI 541360	CPYR_100.001	Pyrus communis	Bonne d'Ezee	-0.0212186	-0.0195313	0.00652132	-0.00818767	Communis	Occidental	Admixed_Communis	P. communis J
PI 541382	CPYR_1005.001	Pyrus communis subsp. pyraster	P. communis ssp. pyraster Olez 4 - Turkey	-0.0179399	0.0121051	-0.00823302	0.0192759	Communis	Occidental	P. communis pyraster	P. communis pyraster
PI 541755	CPYR_1007.001	Pyrus hybrid	P. hybrid (salicifolia or elaeagrifolia) - Turkey	-0.00649081	0.0586819	-0.0235237	-0.0470276	Group2	Occidental	P. elaeagrifolia	P. elaeagrifolia & syriaca	Pyrus elaeagrifolia
PI 436538	CPYR_101.001	Pyrus communis	BP-1 (Bien Donne 1)	0.000564405	0.00329179	0.0113656	-0.00803715	between European and Asian	Admixed	South-East US	-	Pyrus hybrid
PI 541978	CPYR_1010.009	Pyrus syriaca	P. syriaca No. 2 - Iran	-0.0032342	0.0567804	-0.0218593	-0.0273422	Group2	Occidental	Admixed_Group1	P. elaeagrifolia & syriaca
PI 541979	CPYR_1011.001	Pyrus syriaca	P. syriaca - Iran 1970	-0.0020997	0.060806	-0.0232377	-0.030219	Group2	Occidental	Group2	P. elaeagrifolia & syriaca
PI 541979	CPYR_1011.005	Pyrus syriaca	P. syriaca - Iran	-0.00178283	0.0606578	-0.023158	-0.0314986	Group2	Occidental	Group2	P. elaeagrifolia & syriaca
PI 541385	CPYR_1016.001	Pyrus communis	P. communis - Turkey	-0.017428	0.0146265	-0.00839463	0.0169313	Communis	Occidental	P. communis pyraster	P. communis pyraster	Pyrus communis subsp. pyraster
PI 541927	CPYR_1018.001	Pyrus pyrifolia	P. pyrifolia from A. Donovan house	0.0461517	0.0132086	0.0577897	0.00364997	Group4	Oriental	P. pyrifolia & ×sinkiangensis	-
PI 420810	CPYR_102.001	Pyrus communis	BP-2 (Bien Donne 2)	-0.0043765	-0.00525954	0.012488	0.0133808	between European and Asian (closer to EU)	Occidental	Admixed	P. communis A	Pyrus communis hybrid
PI 541113	CPYR_1022.002	Pyrus calleryana f. graciliflora	P. calleryana f. graciliflora Morton Arboretum O.P.	0.0455044	-0.0112152	-0.0131176	0.00205697	Group3	Oriental	Admixed	-	Pyrus hybrid
PI 541305	CPYR_103.001	Pyrus communis	Brandy	-0.0185059	0.00442279	-0.00414975	0.0106174	Communis	Occidental	Communis E	P. communis E
PI 541722	CPYR_1059.005	Pyrus hybrid	Ayers	-0.00679014	-0.0116635	0.0124472	-0.00715583	between European and Asian (closer to EU)	Occidental	Admixed	P. communis J
PI 264192	CPYR_106.002	Pyrus communis	Beurré Dilly	-0.0191922	-0.00485723	0.000455028	0.00462655	Communis	Occidental	Admixed_Communis	P. communis F
PI 541455	CPYR_1062.001	Pyrus communis	Beierschmitt	-0.0248157	-0.038063	0.0126676	-0.0110679	Communis	Occidental	Admixed_Communis	P. communis J
PI 43183	CPYR_1063.001	Pyrus communis	Belmont	-0.0213942	-0.0255146	0.0091824	-0.0152028	Communis	Occidental	Admixed_Communis	P. communis A
PI 136620	CPYR_1064.001	Pyrus communis	Bergamotte Arsene Sannier	-0.0245641	-0.0378184	0.0132899	-0.017802	Communis	Occidental	Admixed_Communis	P. communis G
PI 279328	CPYR_1066.003	Pyrus communis	Bergamote Tardive de Ganzel	-0.0171991	0.00474389	-0.00279661	-0.00751084	Communis	Occidental	Admixed	P. communis E
PI 541329	CPYR_1067.002	Pyrus communis	Beurré Auguste	-0.0238384	-0.0360127	0.0127924	-0.0174355	Communis	Occidental	Admixed_Communis	P. communis J
PI 136621	CPYR_1068.002	Pyrus communis	Beurré d'Avril	-0.0134993	-0.00131118	0.00217531	-0.00119747	Communis	Occidental	Admixed	P. communis F
PI 105548	CPYR_1069.002	Pyrus communis	Beurré Flon	-0.0213051	-0.0246423	0.00888264	-0.0142124	Communis	Occidental	Admixed_Communis	P. communis A
PI 131489	CPYR_1070.002	Pyrus communis	Beurré Madame Henre Lamy	-0.0234977	-0.0317404	0.0102707	-0.024211	Communis	Occidental	Admixed_Communis	P. communis F
PI 541330	CPYR_1071.003	Pyrus communis	Blanquet Precoce	-0.0203003	-0.00397749	-0.00157818	0.00970899	Communis	Occidental	Admixed_Communis	P. communis E	Pyrus communis hybrid
PI 104532	CPYR_1073.004	Pyrus communis	Beurré Capiaumont	-0.02109	-0.0225403	0.00705803	-0.00622413	Communis	Occidental	Admixed_Communis	P. communis D
PI 131123	CPYR_1075.001	Pyrus communis	Charles Escaig	-0.0239505	-0.0340325	0.0110515	-0.0192303	Communis	Occidental	Admixed_Communis	P. communis J
PI 131992	CPYR_1078.005	Pyrus communis	Citron D'Ete	-0.0159797	0.0078442	-0.00340598	0.0129919	Communis	Occidental	Admixed	P. communis F	Pyrus communis hybrid
PI 105193	CPYR_1079.001	Pyrus communis	Clara Frijs (Comtesse Clara Frijs)	-0.0231251	-0.0254788	0.00727039	-0.00143847	Communis	Occidental	Admixed_Communis	P. communis E
PI 541723	CPYR_1083.001	Pyrus hybrid	Douglas	-0.00616089	-0.0246818	0.0177081	-0.0138985	between European and Asian- but close to Communis	Occidental	Admixed_Communis	P. communis F	Pyrus communis
PI 541274	CPYR_571.002	Pyrus communis	Thornley	-0.0229816	-0.0302353	0.00982826	-0.0119794	Communis	Occidental	Admixed_Communis	P. communis I
PI 541337	CPYR_1088.004	Pyrus communis	Early Green Sugar	-0.0207872	-0.0162762	0.00423833	0.000384874	Communis	Occidental	Admixed_Communis	P. communis J
PI 131460	CPYR_1089.002	Pyrus communis	Emile d'Heyst	-0.0219288	-0.0213523	0.00630864	-0.020867	Communis	Occidental	Admixed_Communis	P. communis F
PI 541445	CPYR_1090.001	Pyrus communis	Ewart (rec. as 4x - not 4x)	-0.0199283	-0.00608806	-0.00012333	0.00686901	Communis	Occidental	Admixed_Communis	P. communis D	Pyrus communis hybrid
PI 541339	CPYR_1096.001	Pyrus communis	HW 600 (Harrow, Ontario)	-0.0241304	-0.0367337	0.0124127	-0.0155915	Communis	Occidental	Admixed_Communis	P. communis J
PI 255605	CPYR_11.004	Pyrus communis	Admiral Gervais	-0.0195423	-0.0107941	0.00272435	-0.0111563	Communis	Occidental	Admixed_Communis	P. communis E
PI 131045	CPYR_1102.002	Pyrus communis	Jakobowka Hanowerska	-0.0194862	0.00101143	-0.00288481	0.0118489	Communis	Occidental	Admixed	P. communis E	Pyrus communis hybrid
PI 144035	CPYR_1105.002	Pyrus sp.	Laioyang 50	0.0374613	0.0231684	0.0473762	-0.00132432	Group4	Oriental	P. ussuriensis	-	Pyrus ussuriensis
PI 127715	CPYR_1106.001	Pyrus hybrid	Krylov	-0.0032131	-0.00102719	0.0186628	-0.00184531	between European and Asian	Admixed	North US-Canada	-
PI 144311	CPYR_1108.001	Pyrus communis	Latvian A	-0.0190015	0.00374299	-0.00446775	0.0194845	Communis	Occidental	Admixed	P. communis E	Pyrus communis hybrid
PI 127041	CPYR_1110.003	Pyrus communis	Laxton's Satisfaction	-0.0231666	-0.0327272	0.0114502	-0.0156728	Communis	Occidental	Admixed_Communis	P. communis G
PI 541343	CPYR_1111.004	Pyrus communis	Mac	-0.0239407	-0.0332296	0.0107693	-0.0114626	Communis	Occidental	Admixed_Communis	P. communis G
PI 137111	CPYR_1112.002	Pyrus communis	Madame Gillekins	-0.0210869	-0.0181808	0.00480657	-0.00893006	Communis	Occidental	Admixed_Communis	P. communis A
PI 130990	CPYR_1113.001	Pyrus communis	Madame Verte	-0.0201625	-0.0095928	0.00106181	0.00096731	Communis	Occidental	Admixed_Communis	P. communis E
PI 541724	CPYR_1114.004	Pyrus hybrid	Mandan 58-4	-0.00746418	-0.00573643	0.0139547	-0.00377279	between European and Asian	Occidental	Admixed	P. communis J
PI 541725	CPYR_1115.001	Pyrus hybrid	Mandan 62-1	-0.00976431	-0.00520782	0.0135743	-0.00403315	between European and Asian	Occidental	Admixed	P. communis I
PI 541446	CPYR_1116.001	Pyrus communis	Marks	-0.023324	-0.0274204	0.00886875	-0.0145284	Communis	Occidental	Admixed_Communis	P. communis C
PI 183962	CPYR_1117.001	Pyrus communis	Marqueza	-0.0238033	-0.0336421	0.0114258	-0.0210365	Communis	Occidental	Admixed_Communis	P. communis J
PI 97348	CPYR_1119.001	Pyrus pyrifolia	Meigetsu	0.0460382	0.0140214	0.0590765	0.00373954	Group4	Oriental	P. pyrifolia & ×sinkiangensis	-
PI 324126	CPYR_112.001	Pyrus communis	Butirra di Roma	-0.0242659	-0.0345206	0.0115153	-0.0146736	Communis	Occidental	Admixed_Communis	P. communis F
PI 541345	CPYR_1120.001	Pyrus communis	Merricourt	-0.00778349	-0.019274	0.0159858	-0.00976112	between European and Asian	Occidental	Admixed_Communis	P. communis J
PI 541346	CPYR_1122.001	Pyrus communis	Mississippi US 3-10-5	-0.0168809	-0.0217389	0.0120565	-0.0136228	Communis	Occidental	Admixed_Communis	P. communis D
PI 142234	CPYR_1123.004	Pyrus communis	Mitchell	-0.0229048	-0.0253982	0.00764993	-0.00925079	Communis	Occidental	Admixed_Communis	P. communis F
PI 541347	CPYR_1124.003	Pyrus communis	Moe	-0.0204901	-0.00986864	0.00204723	0.00585499	Communis	Occidental	Admixed_Communis	P. communis A	Pyrus communis hybrid
PI 172495	CPYR_1128.003	Pyrus communis	Norhausen Forelle (Nordhäuser Forellenbirne)	-0.0242874	-0.0359098	0.0122541	-0.0147017	Communis	Occidental	Admixed_Communis	P. communis J
PI 91450	CPYR_1129.002	Pyrus pyrifolia	P. pyrifolia hybrid	0.0290516	-0.00212795	0.0422746	-0.00711948	between European and Asian, but closer to Group4	Oriental	Admixed	-	Pyrus hybrid
PI 143979	CPYR_1130.001	Pyrus hybrid	Olia	-0.0239031	-0.0342068	0.0111317	-0.0129408	Communis	Occidental	Admixed_Communis	P. communis A	Pyrus communis
PI 130991	CPYR_1133.001	Pyrus communis	Petersbirne	-0.0225549	-0.0261913	0.00858575	-0.00777003	Communis	Occidental	Admixed_Communis	P. communis A
PI 541726	CPYR_1135.001	Pyrus hybrid	Pontotoc	0.00902999	-0.00324761	0.0230308	-0.00396332	between European and Asian	Admixed	Admixed	-
PI 131136	CPYR_1141.002	Pyrus communis	Saint Gilles	-0.0237313	-0.0319206	0.010566	-0.0193554	Communis	Occidental	Admixed_Communis	P. communis D
PI 541348	CPYR_1142.002	Pyrus communis	Sierra	-0.0232549	-0.0326002	0.0115904	-0.0247365	Communis	Occidental	Admixed_Communis	P. communis J
PI 541349	CPYR_1143.001	Pyrus communis	Sirrine	-0.0245588	-0.037129	0.0124097	-0.015928	Communis	Occidental	Admixed_Communis	P. communis J
PI 541727	CPYR_1144.001	Pyrus hybrid	Sodak	0.00664705	-0.00568942	0.0180508	-0.0035045	between European and Asian	Admixed	Admixed	-
PI 541351	CPYR_1146.001	Pyrus communis	Spartlet	-0.0246164	-0.0392088	0.0142764	-0.0229593	Communis	Occidental	Communis A	P. communis J
PI 44151	CPYR_1148.001	Pyrus ussuriensis	Suan Li	0.0450855	0.0133512	0.0519704	0.00227997	Group4	Oriental	Admixed	-	Pyrus pyrifolia/ussuriensis hybrid
PI 142477	CPYR_1149.002	Pyrus communis	Sudduth (=Burkett)	-0.0172253	0.00973736	-0.00621054	-0.00128129	Communis	Occidental	Admixed	P. communis E
PI 276764	CPYR_115.001	Pyrus communis	Butirra Precoce Morettini	-0.022834	-0.0305852	0.0105064	-0.0116284	Communis	Occidental	Admixed_Communis	P. communis F
PI 541353	CPYR_1150.001	Pyrus communis	Sugar Top	-0.0218873	-0.0191224	0.0052297	-0.0105115	Communis	Occidental	Admixed_Communis	P. communis A
PI 541354	CPYR_1151.002	Pyrus communis	Surecrop	-0.0217092	-0.024813	0.00872499	-0.0142581	Communis	Occidental	Admixed_Communis	P. communis J
PI 131889	CPYR_1153.001	Pyrus communis	Tarquin Des Pyrenees	-0.0197221	-0.00392405	-0.000649115	-0.0110431	Communis	Occidental	Admixed_Communis	P. communis F
PI 189686	CPYR_1155.003	Pyrus communis	Tsarigradka	-0.0239324	-0.0350879	0.012174	-0.0162754	Communis	Occidental	Admixed_Communis	P. communis J
PI 129642	CPYR_1156.002	Pyrus communis	Tyford Monarch	-0.0200214	-0.0151012	0.00417495	-0.00838084	Communis	Occidental	Admixed_Communis	P. communis F
PI 542007	CPYR_1157.002	Pyrus ussuriensis	Tzu Ma Li	0.0441726	0.015295	0.0518823	0.00179301	Group4	Oriental	Admixed	-	Pyrus pyrifolia/ussuriensis hybrid
PI 189695	CPYR_1158.002	Pyrus communis	Ulitchka	-0.0178936	0.00690315	-0.00557337	0.0195067	Communis	Occidental	Admixed	P. communis E	Pyrus communis hybrid
PI 541356	CPYR_1160.001	Pyrus communis	Willard	-0.0228873	-0.0277102	0.00886512	-0.012476	Communis	Occidental	Admixed_Communis	P. communis J
PI 541388	CPYR_1168.001	Pyrus communis	El Dorado	-0.0211174	-0.0270526	0.0106189	-0.0225896	Communis	Occidental	Admixed_Communis	P. communis J
PI 129643	CPYR_1162.003	Pyrus communis	Winter Cole	-0.0198079	-0.0119124	0.00334668	-0.00473911	Communis	Occidental	Admixed_Communis	P. communis J
PI 541285	CPYR_1164.001	Pyrus communis	Winter Nelis	-0.0174233	-0.00465532	0.000879622	-0.00152672	Communis	Occidental	Admixed_Communis	P. communis F
PI 541387	CPYR_1165.001	Pyrus communis	Bosc - OP-5	-0.0224834	-0.0223294	0.00632202	-0.0142319	Communis	Occidental	Admixed_Communis	P. communis I
PI 541714	CPYR_1166.001	Pyrus hybrid	Kieffer	0.00889376	-0.0203206	0.0302975	-0.0141792	between European and Asian	Admixed	South-East US	-
PI 541299	CPYR_1167.001	Pyrus communis	Magness	-0.0132088	-0.0232155	0.0143551	-0.0138217	between European and Asian (closer to EU)	Occidental	Admixed_Communis	P. communis D
PI 541012	CPYR_1170.002	Pyrus calleryana	OPR-157 P. calleryana	0.0490053	-0.0256207	-0.0352659	0.00660135	Group3	Oriental	P. calleryana & koehnei	-
PI 541085	CPYR_1171.003	Pyrus calleryana	OPR-135 P. calleryana	0.0491833	-0.0274334	-0.0422874	0.00439457	Group3	Oriental	P. calleryana & koehnei	-
PI 541904	CPYR_1173.002	Pyrus pyrifolia	Seuri Li	0.0467996	0.0126088	0.0573496	0.00380831	Group4	Oriental	P. pyrifolia & ×sinkiangensis	-
PI 542023	CPYR_1177.001	Pyrus ×bretschneideri	Tsu Li	0.0456173	0.012395	0.0547954	0.00373557	Group4	Oriental	P. pyrifolia & ×sinkiangensis	-	Pyrus pyrifolia
PI 542024	CPYR_1184.001	Pyrus ussuriensis	Tang Li	0.0433778	0.0137019	0.0465339	0.0013863	Group4	Oriental	Admixed	-	Pyrus pyrifolia/ussuriensis hybrid
PI 300691	CPYR_1187.001	Pyrus communis	Beurré Hardy	-0.0204973	-0.00954463	0.00129686	-0.00361474	Communis	Occidental	Admixed_Communis	P. communis F
PI 282935	CPYR_119.001	Pyrus communis	Butirra Rosata Morettini	-0.0225172	-0.0213068	0.00554654	-0.0100305	Communis	Occidental	Admixed_Communis	P. communis J
PI 325930	CPYR_1190.001	Pyrus dimorphophylla	P. dimorphophylla Vo-29	0.0422216	-0.00855104	-0.0232053	-0.00159711	Group3	Oriental	P. dimorphopylla & fauriei	-
PI 324172	CPYR_1191.001	Pyrus communis subsp. caucasica	P. communis ssp. caucasica - Yalta	-0.013712	0.0317477	-0.0151123	0.0177529	Communis	Occidental	Admixed	P. communis hybrid	Pyrus hybrid
PI 324028	CPYR_1192.001	Pyrus communis subsp. caucasica	P. communis ssp. caucasica - Stavropol	-0.0152344	0.026146	-0.014447	0.0814636	Communis	Occidental	P. communis caucasica	P. communis caucasica A
PI 324032	CPYR_1193.001	Pyrus communis subsp. caucasica	P. communis ssp. caucasica - Stavropol	-0.0157077	0.0232008	-0.0133624	0.0836715	Communis	Occidental	P. communis caucasica	P. communis caucasica A
PI 324037	CPYR_1194.001	Pyrus communis subsp. caucasica	P. communis ssp. caucasica - Caucasus Mts.	-0.0153069	0.027836	-0.0154723	0.0993037	Communis	Occidental	P. communis caucasica	P. communis caucasica A
PI 324042	CPYR_1195.001	Pyrus communis subsp. caucasica	P. communis ssp. caucasica - Caucasus Mts.	-0.0153407	0.0280328	-0.0156283	0.0992126	Communis	Occidental	P. communis caucasica	P. communis caucasica A
PI 541864	CPYR_1196.001	Pyrus nivalis	P. nivalis	-0.0128405	0.0406727	-0.0178912	-0.0418488	Group1	Occidental	Admixed	P. communis E
PI 305300	CPYR_1197.001	Pyrus ussuriensis	P. ussuriensis - China (from Vavilov)	0.0339929	0.0287238	0.0480675	-0.00243529	Group4	Oriental	P. ussuriensis	-
PI 305300	CPYR_1198.001	Pyrus ussuriensis	P. ussuriensis - China (from Vavilov)	0.0342264	0.0288321	0.0486766	-0.0023266	Group4	Oriental	P. ussuriensis	-
PI 324124	CPYR_12.002	Pyrus communis	Akca	-0.0168024	0.0155588	-0.00852277	0.0261267	Communis	Occidental	Admixed	P. communis hybrid	Pyrus communis hybrid
PI 305300	CPYR_1200.001	Pyrus ussuriensis	P. ussuriensis - China (from Vavilov)	0.0328125	0.0268531	0.0466149	-0.0022511	Group4	Oriental	P. ussuriensis	-
PI 542014	CPYR_1201.001	Pyrus ussuriensis	P. ussuriensis No. 1 - Korea	0.0340294	0.0268583	0.0462437	-0.00239437	Group4	Oriental	P. ussuriensis	-
PI 542014	CPYR_1202.001	Pyrus ussuriensis	P. ussuriensis No. 2 - Korea	0.0344813	0.0272831	0.04792	-0.00247816	Group4	Oriental	P. ussuriensis	-
PI 542014	CPYR_1203.001	Pyrus ussuriensis	P. ussuriensis No. 3 - Korea	0.034037	0.0269894	0.046109	-0.00225045	Group4	Oriental	P. ussuriensis	-
PI 542014	CPYR_1204.001	Pyrus ussuriensis	P. ussuriensis No. 4 - Korea	0.0342837	0.0270892	0.0461909	-0.00241159	Group4	Oriental	P. ussuriensis	-
PI 541670	CPYR_1205.001	Pyrus glabra	P. glabra	-0.00699122	0.0619747	-0.0246874	-0.0338889	Group2	Occidental	Admixed_Group1	P. elaeagrifolia & syriaca	Pyrus hybrid
PI 541670	CPYR_1206.001	Pyrus glabra	P. glabra	-0.0081586	0.0532767	-0.0218231	-0.0179487	Group2	Occidental	Admixed_Group1	P. elaeagrifolia & syriaca	Pyrus hybrid
PI 541670	CPYR_1207.001	Pyrus glabra	P. glabra	-0.0103382	0.0432521	-0.017785	-0.00514151	Group1	Occidental	Admixed_Group1	P. elaeagrifolia & syriaca	Pyrus hybrid
PI 541670	CPYR_1208.001	Pyrus glabra	P. glabra	-0.00677576	0.0581085	-0.0232197	-0.032888	Group2	Occidental	Admixed_Group1	P. elaeagrifolia & syriaca	Pyrus hybrid
PI 541156	CPYR_121.001	Pyrus communis	Butt	-0.0179215	0.00605414	-0.0055047	0.0134429	Communis	Occidental	Admixed	P. communis E	Pyrus communis hybrid
PI 541601	CPYR_1214.001	Pyrus dimorphophylla	P. dimorphophylla	0.0420286	-0.00807356	-0.0199508	-0.0011921	Group3	Oriental	P. dimorphopylla & fauriei	-
PI 540965	CPYR_1216.001	Pyrus betulifolia	P. betulifolia	0.0492333	-0.0386843	-0.0805558	-0.00885787	Group3	Oriental	P. betulaefolia	-
PI 541691	CPYR_1217.002	Pyrus hondoensis	P. hondoensis 23A x P. hondoensis OP seedling	0.020512	0.0219279	0.0291213	-0.00189566	between European and Asian	Admixed	Central-South Asia	-	Pyrus hybrid
PI 617513	CPYR_1218.001	Pyrus calleryana	P. calleryana PC-5 (non-typical)	0.0488612	-0.0269372	-0.0376721	0.00714451	Group3	Oriental	P. calleryana & koehnei	-
PI 617515	CPYR_1220.001	Pyrus calleryana	P. calleryana PC-7 (hybrid)	0.0489492	-0.0267979	-0.0372644	0.00701814	Group3	Oriental	P. calleryana & koehnei	-
PI 541389	CPYR_1221.001	Pyrus communis	P. communis	-0.0239537	-0.0344832	0.0117299	-0.0151094	Communis	Occidental	Admixed_Communis	P. communis J
PI 541760	CPYR_1226.001	Pyrus hybrid	Chieh Li x Japanese Golden Russet (Decline Resist.)	0.042316	0.0168522	0.0497408	0.000865274	Group4	Oriental	Admixed	-	Pyrus pyrifolia/ussuriensis hybrid
PI 541761	CPYR_1227.001	Pyrus hybrid	Chieh Li x Japanese Golden Russet (Decline Susc.)	0.0439605	0.0190747	0.0612725	0.00249353	Group4	Oriental	Admixed	-	Pyrus pyrifolia/ussuriensis hybrid
PI 541762	CPYR_1228.001	Pyrus pyrifolia	Japanese Golden Russet x Mikado (Decline Resist.)	0.0465923	0.0158873	0.0659177	0.0045316	Group4	Oriental	P. pyrifolia & ×sinkiangensis	-
PI 541763	CPYR_1229.001	Pyrus pyrifolia	Japanese Golden Russet x Mikado (Decline Susc.)	0.0461508	0.016118	0.065098	0.00452664	Group4	Oriental	P. pyrifolia & ×sinkiangensis	-
PI 541157	CPYR_123.001	Pyrus communis	California	-0.0218975	-0.0255757	0.00807545	-0.0130268	Communis	Occidental	Admixed_Communis	P. communis J
PI 541765	CPYR_1231.001	Pyrus pyrifolia	Hawaii x Japanese Golden Russet	0.0468088	0.0163061	0.0681601	0.00473337	Group4	Oriental	P. pyrifolia & ×sinkiangensis	-
PI 541766	CPYR_1232.002	Pyrus pyrifolia	Hawaii x Japanese Golden Russet	0.0460946	0.0158469	0.0644739	0.00447495	Group4	Oriental	P. pyrifolia & ×sinkiangensis	-
PI 541767	CPYR_1233.001	Pyrus hybrid	Nijisseiki x Old Home	0.0122667	0.00224659	0.0382281	0.00243871	between European and Asian	Admixed	Admixed	-
PI 541680	CPYR_1236.001	Pyrus hondoensis	P. hondoensis 117-28B x P. hondoensis OP seedling	0.00490127	-0.00224997	0.0237999	-0.00661385	between European and Asian	Admixed	North US-Canada	-	Pyrus hybrid
PI 541680	CPYR_1236.003	Pyrus hondoensis	P. hondoensis 117-28B x P. hondoensis OP seedling	0.0421339	-0.00694497	-0.0176591	-0.00428313	between Group3 and 4	Oriental	Admixed	-	Pyrus hybrid
PI 540966	CPYR_1237.001	Pyrus betulifolia	P. betulifolia OSU-1	0.0489539	-0.0378212	-0.0787935	-0.00887587	Group3	Oriental	P. betulaefolia	-
PI 540967	CPYR_1238.001	Pyrus betulifolia	P. betulifolia OSU-1	0.0489403	-0.037589	-0.078116	-0.00853971	Group3	Oriental	P. betulaefolia	-
PI 541768	CPYR_1239.001	Pyrus hybrid	P. pashia x P. calleryana	0.0393425	-0.0106611	-0.0179796	0.00203454	Group3	Oriental	Admixed_Group3	-
PI 541769	CPYR_1241.001	Pyrus hybrid	P. pashia x P. betulifolia	0.0462088	-0.0223284	-0.0458204	-0.00350752	Group3	Oriental	Admixed_Group3	-
PI 541642	CPYR_1242.001	Pyrus fauriei	P. fauriei MA x P. fauriei W-6	0.0433725	-0.00861322	-0.0179364	-0.000707274	Group3	Oriental	P. dimorphopylla & fauriei	-
PI 541643	CPYR_1243.001	Pyrus fauriei	P. fauriei MA x P. fauriei W-6	0.0431161	-0.00765636	-0.0170778	-6.90512e-05	Group3	Oriental	P. dimorphopylla & fauriei	-
PI 540968	CPYR_1244.001	Pyrus betulifolia	P. betulifolia OSU-3 seedling A	0.0491603	-0.0388596	-0.0806197	-0.00897699	Group3	Oriental	P. betulaefolia	-
PI 541050	CPYR_1245.001	Pyrus calleryana	P. calleryana	0.0495798	-0.0266577	-0.0371239	0.0066302	Group3	Oriental	P. calleryana & koehnei	-
PI 541391	CPYR_1248.001	Pyrus communis subsp. pyraster	P. communis ssp. pyraster Olez 5 - Turkey	-0.0189299	0.00834571	-0.00597571	0.0158639	Communis	Occidental	P. communis pyraster	P. communis pyraster
PI 541392	CPYR_1249.001	Pyrus communis subsp. pyraster	P. communis ssp. pyraster Olez 4 - Turkey	-0.0181676	0.0113761	-0.00735319	0.0199908	Communis	Occidental	P. communis pyraster	P. communis pyraster
PI 541393	CPYR_1250.001	Pyrus communis subsp. pyraster	P. communis ssp. pyraster Olez 5 - Turkey	-0.0160357	0.0187623	-0.00976679	0.00980251	Communis	Occidental	Admixed	P. communis pyraster	Pyrus communis hybrid
PI 541394	CPYR_1251.002	Pyrus communis	P. communis - France	-0.0181439	0.00917695	-0.00647777	0.0200522	Communis	Occidental	P. communis pyraster	P. communis pyraster	Pyrus communis subsp. pyraster
PI 541395	CPYR_1252.001	Pyrus communis subsp. pyraster	P. communis ssp. pyraster Olez 3 - Turkey	-0.017729	0.0133057	-0.00785001	0.0127839	Communis	Occidental	P. communis pyraster	P. communis pyraster
PI 541051	CPYR_1253.001	Pyrus calleryana	P. calleryana	0.0494137	-0.0252647	-0.0334742	0.00702276	Group3	Oriental	P. calleryana & koehnei	-
PI 541052	CPYR_1254.001	Pyrus calleryana	P. calleryana	0.0492381	-0.0266625	-0.0369345	0.00680102	Group3	Oriental	P. calleryana & koehnei	-
PI 542015	CPYR_1260.001	Pyrus ussuriensis	P. ussuriensis MA 1919-23	0.034164	0.0267576	0.0470196	-0.00268927	Group4	Oriental	P. ussuriensis	-
PI 540971	CPYR_1261.001	Pyrus betulifolia	P. betulifolia	0.0490941	-0.0356198	-0.0737184	-0.00786446	Group3	Oriental	P. betulaefolia	-
PI 540972	CPYR_1262.001	Pyrus betulifolia	P. betulifolia	0.0494427	-0.0368171	-0.0751266	-0.00782215	Group3	Oriental	P. betulaefolia	-
PI 540973	CPYR_1263.001	Pyrus betulifolia	P. betulifolia OSU-3	0.0488093	-0.0381406	-0.079287	-0.00884234	Group3	Oriental	P. betulaefolia	-
PI 541053	CPYR_1264.003	Pyrus calleryana	P. calleryana OSU-2	0.0496641	-0.0267971	-0.0378265	0.00698411	Group3	Oriental	P. calleryana & koehnei	-
PI 541054	CPYR_1265.003	Pyrus calleryana	P. calleryana OSU-3	0.0499607	-0.0269696	-0.0369252	0.00706153	Group3	Oriental	P. calleryana & koehnei	-
PI 541055	CPYR_1266.002	Pyrus calleryana	P. calleryana OSU-5	0.050222	-0.0269052	-0.0378799	0.00660845	Group3	Oriental	P. calleryana & koehnei	-
PI 541056	CPYR_1267.001	Pyrus calleryana	P. calleryana OSU-6	0.0493697	-0.0262203	-0.0360697	0.00661396	Group3	Oriental	P. calleryana & koehnei	-
PI 541057	CPYR_1268.002	Pyrus calleryana	P. calleryana OSU-7	0.0501415	-0.0274375	-0.038507	0.00690416	Group3	Oriental	P. calleryana & koehnei	-
PI 541058	CPYR_1269.002	Pyrus calleryana	P. calleryana OSU-8	0.0498449	-0.0273754	-0.0382603	0.00678051	Group3	Oriental	P. calleryana & koehnei	-
PI 541158	CPYR_127.001	Pyrus communis	Canal Pear	-0.0240909	-0.0371476	0.0130537	-0.0190675	Communis	Occidental	Admixed_Communis	P. communis F
PI 541059	CPYR_1270.001	Pyrus calleryana	P. calleryana OSU-9	0.0497691	-0.0273955	-0.0382889	0.00717322	Group3	Oriental	P. calleryana & koehnei	-
PI 541770	CPYR_1273.001	Pyrus hybrid	P. betulifolia x P. calleryana	0.0486809	-0.0297706	-0.0531338	-0.000828215	Group3	Oriental	Admixed_Group3	-
PI 541771	CPYR_1274.001	Pyrus hybrid	P. betulifolia-2 x P. calleryana-2	0.0497319	-0.0330417	-0.0596863	-0.00146245	Group3	Oriental	Admixed_Group3	-
PI 260200	CPYR_1275.001	Pyrus hybrid	Cherry Pear	-0.0202502	0.000651739	-0.00347244	0.0143527	Communis	Occidental	Admixed	P. communis pyraster
PI 541959	CPYR_1276.001	Pyrus calleryana	P. calleryana MA182-53	0.0486023	-0.0196025	-0.021346	0.00595439	Group3	Oriental	P. calleryana & koehnei	-
PI 541626	CPYR_1277.001	Pyrus elaeagrifolia	P. elaeagrifolia WB-4 - Turkey	-0.00624847	0.0610169	-0.0238769	-0.0498583	Group2	Occidental	P. elaeagrifolia	P. elaeagrifolia & syriaca
PI 541616	CPYR_1278.001	Pyrus elaeagrifolia	P. elaeagrifolia 'Turkish Mist'	-0.006538	0.059491	-0.0234881	-0.048031	Group2	Occidental	P. elaeagrifolia	P. elaeagrifolia & syriaca
PI 541159	CPYR_128.002	Pyrus hybrid	Canner (Waite?)	-0.00953788	-0.0239686	0.0172094	-0.0137688	between European and Asian- but close to Communis	Occidental	Admixed_Communis	P. communis J	Pyrus communis
PI 541644	CPYR_1280.003	Pyrus fauriei	P. fauriei	0.0432746	-0.0108928	-0.0255667	-0.000744624	Group3	Oriental	P. dimorphopylla & fauriei	-
PI 617516	CPYR_1281.001	Pyrus fauriei	P. fauriei - Korea (Morton Arboretum)	0.0431651	-0.00569393	-0.0099147	-0.000223517	Group3	Oriental	P. dimorphopylla & fauriei	-
PI 541646	CPYR_1283.001	Pyrus fauriei	P. fauriei	0.0425646	-0.0105754	-0.0259677	-0.000627973	Group3	Oriental	P. dimorphopylla & fauriei	-
PI 542016	CPYR_1286.001	Pyrus ussuriensis	P. ussuriensis CJW	0.0339876	0.0280433	0.0476316	-0.00259834	Group4	Oriental	P. ussuriensis	-
PI 541627	CPYR_1287.001	Pyrus elaeagrifolia	P. elaeagrifolia Olez 2 - Turkey	-0.00689677	0.059519	-0.0238142	-0.0503572	Group2	Occidental	P. elaeagrifolia	P. elaeagrifolia & syriaca
PI 132094	CPYR_1288.001	Pyrus communis subsp. pyraster	P. communis ssp. pyraster - Iran	-0.0182833	0.00783924	-0.00633486	0.0227524	Communis	Occidental	P. communis pyraster	P. communis pyraster
PI 541160	CPYR_129.002	Pyrus hybrid	Cayuga	-0.0195174	-0.00739616	0.000786344	0.00630868	Communis	Occidental	Admixed_Communis	P. communis E	Pyrus communis
PI 541922	CPYR_1290.001	Pyrus pyrifolia	P. pyrifolia Donovan	0.0459082	0.0140379	0.0574248	0.00325736	Group4	Oriental	P. pyrifolia & ×sinkiangensis	-
PI 542017	CPYR_1293.002	Pyrus ussuriensis	P. ussuriensis 2497-22 - China	0.0345755	0.0271621	0.0475283	-0.00237135	Group4	Oriental	P. ussuriensis	-
PI 541603	CPYR_1296.001	Pyrus dimorphophylla	P. dimorphophylla 408	0.0423599	-0.00828438	-0.0207626	-0.00158158	Group3	Oriental	P. dimorphopylla & fauriei	-
PI 541923	CPYR_1297.001	Pyrus pyrifolia	P. pyrifolia Donovan	0.0431478	0.0108002	0.0474602	0.00182379	Group4	Oriental	P. pyrifolia & ×sinkiangensis	-
PI 541924	CPYR_1298.001	Pyrus pyrifolia	P. pyrifolia Kor 5	0.0340511	0.0267969	0.0452571	-0.00314433	Group4	Oriental	P. ussuriensis	-	Pyrus ussuriensis
PI 541114	CPYR_13.003	Pyrus communis	Allexandrine Douillard	-0.0201075	-0.0167277	0.00453043	-0.00841711	Communis	Occidental	Admixed_Communis	P. communis F
PI 312495	CPYR_130.003	Pyrus communis	Cebulka	-0.0190014	0.00367831	-0.00380089	0.020458	Communis	Occidental	Admixed	P. communis E	Pyrus communis hybrid
PI 143978	CPYR_1300.001	Pyrus ussuriensis	P. ussuriensis - Manchuria	0.0343864	0.0277561	0.0480377	-0.00220244	Group4	Oriental	P. ussuriensis	-
PI 541062	CPYR_1301.001	Pyrus calleryana	P. calleryana SN	0.0493487	-0.0262754	-0.0366491	0.00744517	Group3	Oriental	P. calleryana & koehnei	-
PI 541063	CPYR_1302.001	Pyrus calleryana	P. calleryana	0.0498888	-0.0269519	-0.0369079	0.00720379	Group3	Oriental	P. calleryana & koehnei	-
PI 541064	CPYR_1303.001	Pyrus calleryana	P. calleryana	0.0452938	-0.0210757	-0.034558	0.0046863	Group3	Oriental	P. calleryana & koehnei	-
PI 541065	CPYR_1304.001	Pyrus calleryana	P. calleryana	0.0492133	-0.0260304	-0.0366284	0.00687979	Group3	Oriental	P. calleryana & koehnei	-
PI 541775	CPYR_1305.001	Pyrus hybrid	P. betulifolia x P. pyrifolia	0.0478433	-0.0120987	-0.011243	-0.00303484	between Group3 and 4	Oriental	Admixed	-
PI 540974	CPYR_1307.002	Pyrus betulifolia	P. betulifolia	0.0491145	-0.0363609	-0.0741412	-0.00788065	Group3	Oriental	P. betulaefolia	-
PI 540975	CPYR_1308.002	Pyrus betulifolia	P. betulifolia	0.0494966	-0.0362341	-0.0740271	-0.00785273	Group3	Oriental	P. betulaefolia	-
PI 540976	CPYR_1309.004	Pyrus betulifolia	P. betulifolia	0.0495727	-0.0367684	-0.0746691	-0.00830567	Group3	Oriental	P. betulaefolia	-
PI 541161	CPYR_131.001	Pyrus communis	Chapin	-0.0227967	-0.0229162	0.00726676	-0.00943003	Communis	Occidental	Admixed_Communis	P. communis I
PI 540977	CPYR_1310.002	Pyrus betulifolia	P. betulifolia	0.0494304	-0.0366586	-0.0751822	-0.00818534	Group3	Oriental	P. betulaefolia	-
PI 540978	CPYR_1311.001	Pyrus betulifolia	P. betulifolia	0.0492776	-0.0364126	-0.0743902	-0.00818987	Group3	Oriental	P. betulaefolia	-
PI 540979	CPYR_1312.003	Pyrus betulifolia	P. betulifolia	0.0494424	-0.0369314	-0.075542	-0.00782816	Group3	Oriental	P. betulaefolia	-
PI 541604	CPYR_1313.001	Pyrus dimorphophylla	P. dimorphophylla x self	0.0412746	-0.00825345	-0.021271	-0.000331758	Group3	Oriental	P. dimorphopylla & fauriei	-
PI 541066	CPYR_1314.002	Pyrus calleryana	OPR-125 P. calleryana	0.0469146	-0.0240669	-0.0343906	0.00595656	Group3	Oriental	P. calleryana & koehnei	-
PI 541776	CPYR_1315.001	Pyrus hybrid	P. ussuriensis x P. calleryana	0.0424907	-0.00032731	0.0051931	0.00208003	between Group3 and 4	Oriental	Admixed	-
PI 542019	CPYR_1318.001	Pyrus ussuriensis	Harbin (P. ussuriensis)	0.0340115	0.0282041	0.048347	-0.00269182	Group4	Oriental	P. ussuriensis	-
PI 541396	CPYR_1319.001	Pyrus communis	OHxF 257	-0.0235464	-0.0326068	0.0108568	-0.0166409	Communis	Occidental	Admixed_Communis	P. communis J
PI 541162	CPYR_132.002	Pyrus communis	Chasseurs	-0.022526	-0.0243884	0.00764014	-0.0116872	Communis	Occidental	Admixed_Communis	P. communis F
PI 541397	CPYR_1320.001	Pyrus communis	OHxF 18	-0.0231017	-0.029406	0.00940452	-0.00663177	Communis	Occidental	Admixed_Communis	P. communis I
PI 541398	CPYR_1321.001	Pyrus communis	OHxF 29	-0.0229687	-0.0280386	0.00913079	-0.0144983	Communis	Occidental	Admixed_Communis	P. communis I
PI 541399	CPYR_1322.001	Pyrus communis	OHxF 7	-0.023027	-0.029199	0.00920173	-0.0112751	Communis	Occidental	Admixed_Communis	P. communis J
PI 541400	CPYR_1323.001	Pyrus communis	OHxF 267	-0.0230019	-0.0274595	0.00856472	-0.0127567	Communis	Occidental	Admixed_Communis	P. communis J
PI 541402	CPYR_1325.001	Pyrus communis	OHxF 40	-0.0229551	-0.0294589	0.00894264	-0.0115058	Communis	Occidental	Admixed_Communis	P. communis J
PI 541403	CPYR_1326.001	Pyrus communis	OHxF 340	-0.0237503	-0.0319993	0.0107109	-0.0145165	Communis	Occidental	Admixed_Communis	P. communis I
PI 541404	CPYR_1327.001	Pyrus communis	OHxF 132	-0.0232877	-0.0292472	0.00906437	-0.00712213	Communis	Occidental	Admixed_Communis	P. communis J
PI 541406	CPYR_1330.002	Pyrus communis	OHxF 130	-0.0234586	-0.0301066	0.00988228	-0.0141147	Communis	Occidental	Admixed_Communis	P. communis D
PI 541779	CPYR_1331.002	Pyrus hybrid	P. dimorphophylla x P. fauriei	0.0435817	-0.0148581	-0.0253176	0.00242318	Group3	Oriental	Admixed_Group3	-
PI 542020	CPYR_1332.001	Pyrus ussuriensis	P. ussuriensis	0.0430657	0.013162	0.0443897	0.00157374	Group4	Oriental	Admixed	-	Pyrus pyrifolia/ussuriensis hybrid
PI 617518	CPYR_1334.001	Pyrus calleryana	P. calleryana	0.0494882	-0.0260809	-0.0361078	0.00700487	Group3	Oriental	P. calleryana & koehnei	-
PI 541409	CPYR_1337.001	Pyrus communis	OHxF 4	-0.0237144	-0.0322202	0.0107763	-0.00939682	Communis	Occidental	Admixed_Communis	P. communis J
PI 541410	CPYR_1338.001	Pyrus communis	OHxF 5	-0.0227583	-0.0288137	0.00944547	-0.00925001	Communis	Occidental	Admixed_Communis	P. communis I
PI 541411	CPYR_1339.001	Pyrus communis	OHxF 23	-0.0235571	-0.0312065	0.00996427	-0.0137143	Communis	Occidental	Admixed_Communis	P. communis D
PI 541987	CPYR_134.001	Pyrus ussuriensis	Chien Pa Li (=Pa Li)	0.0401408	0.0186956	0.0470882	-0.000699341	Group4	Oriental	Admixed	-	Pyrus pyrifolia/ussuriensis hybrid
PI 541412	CPYR_1340.001	Pyrus communis	OHxF 34	-0.0226031	-0.0267069	0.00828702	-0.0151867	Communis	Occidental	Admixed_Communis	P. communis J
PI 541413	CPYR_1342.001	Pyrus communis	OHxF 2	-0.0237192	-0.0314375	0.0101384	-0.0132427	Communis	Occidental	Admixed_Communis	P. communis J
PI 665738	CPYR_1343.001	Pyrus communis	OHxF 69	-0.0233057	-0.0309017	0.00994149	-0.0117966	Communis	Occidental	Admixed_Communis	P. communis I
PI 541414	CPYR_1344.001	Pyrus communis	OHxF 512	-0.0226384	-0.0240306	0.00697232	-0.00682924	Communis	Occidental	Admixed_Communis	P. communis J
PI 541415	CPYR_1345.001	Pyrus communis	OHxF 87	-0.023452	-0.0299114	0.0097663	-0.0132848	Communis	Occidental	Admixed_Communis	P. communis F
PI 541780	CPYR_1348.001	Pyrus hybrid	P-79 x P. betulifolia	0.0153523	-0.0134691	-0.0409846	-0.00412826	between European and Asian	Admixed	US Oregon	-
PI 541416	CPYR_1350.001	Pyrus communis	OHxF 101	-0.0237123	-0.0318498	0.0107925	-0.00757487	Communis	Occidental	Admixed_Communis	P. communis F
PI 541417	CPYR_1351.001	Pyrus communis	OHxF 109	-0.0206112	-0.0265028	0.00966566	-0.0112242	Communis	Occidental	Admixed_Communis	P. communis F
PI 541783	CPYR_1353.001	Pyrus hybrid	P. betulifolia x P. calleryana-5	0.0498316	-0.0328748	-0.0595807	-0.00151095	Group3	Oriental	Admixed_Group3	-
PI 541418	CPYR_1354.001	Pyrus communis	OHxF 112	-0.0236523	-0.0310618	0.0102836	-0.01154	Communis	Occidental	Admixed_Communis	P. communis J
PI 541784	CPYR_1355.001	Pyrus hybrid	P. betulifolia-2 x P-12	0.014117	-0.0161593	-0.040721	0.00126419	between European and Asian	Admixed	US Oregon	-
PI 540980	CPYR_1356.001	Pyrus betulifolia	P. betulifolia-2 x P. betulifolia-1	0.0490088	-0.0383811	-0.0792685	-0.00899344	Group3	Oriental	P. betulaefolia	-
PI 541785	CPYR_1357.001	Pyrus hybrid	P. betulifolia-2 x Farmingdale	0.0113453	-0.0335114	-0.0350691	-0.00483707	between European and Asian	Admixed	US Oregon	-
PI 541786	CPYR_1358.001	Pyrus hybrid	Burkett x P. betulifolia	0.0148974	-0.0166967	-0.0399051	-0.00698762	between European and Asian	Admixed	US Oregon	-
PI 541419	CPYR_1359.001	Pyrus communis	OHxF 198	-0.0236464	-0.0333933	0.011026	-0.0122351	Communis	Occidental	Admixed_Communis	P. communis J
PI 97347	CPYR_136.004	Pyrus pyrifolia	Chojuro	0.0471399	0.0160076	0.0692475	0.00452664	Group4	Oriental	P. pyrifolia & ×sinkiangensis	-
PI 541420	CPYR_1360.001	Pyrus communis	OHxF 230	-0.0227864	-0.0279368	0.00876482	-0.0128538	Communis	Occidental	Admixed_Communis	P. communis H
PI 541422	CPYR_1362.001	Pyrus communis	OHxF 247	-0.0214719	-0.0132913	0.00222211	0.00376429	Communis	Occidental	Admixed_Communis	P. communis I
PI 541423	CPYR_1363.001	Pyrus communis	OHxF 259	-0.0233654	-0.0309826	0.0108072	-0.0188955	Communis	Occidental	Admixed_Communis	P. communis I
PI 541424	CPYR_1364.001	Pyrus communis	OHxF 266	-0.0237294	-0.0322526	0.0108416	-0.0134488	Communis	Occidental	Admixed_Communis	P. communis I
PI 541425	CPYR_1365.001	Pyrus communis	OHxF 280	-0.0228687	-0.0267008	0.00842618	-0.0102269	Communis	Occidental	Admixed_Communis	P. communis J
PI 541426	CPYR_1366.001	Pyrus communis	OHxF 282	-0.0230836	-0.0270111	0.00840131	-0.00909913	Communis	Occidental	Admixed_Communis	P. communis I
PI 541427	CPYR_1367.001	Pyrus communis	OHxF 319	-0.0236947	-0.0311424	0.00999806	-0.00918667	Communis	Occidental	Admixed_Communis	P. communis I
PI 541428	CPYR_1369.001	Pyrus communis	OHxF 377	-0.0226072	-0.0256336	0.00804181	-0.0131273	Communis	Occidental	Admixed_Communis	P. communis F
PI 541787	CPYR_1370.001	Pyrus hybrid	Old Home x P. betulifolia-1	0.0122378	-0.0304716	-0.0357766	-0.00751999	between European and Asian	Admixed	US Oregon	-
PI 541788	CPYR_1371.001	Pyrus hybrid	Old Home x P. betulifolia-1	0.0127099	-0.0264159	-0.0364659	-0.00531239	between European and Asian	Admixed	US Oregon	-
PI 541789	CPYR_1373.001	Pyrus hybrid	OPR-141	0.0419879	0.00430172	0.0109387	-0.00289022	between Group3 and 4	Oriental	Admixed	-
PI 541429	CPYR_1374.004	Pyrus communis subsp. pyraster	P-61 fire blight resistant rootstock	-0.0170206	0.0110552	-0.00729052	0.0273012	Communis	Occidental	Admixed	P. communis hybrid	Pyrus communis hybrid
PI 541430	CPYR_1375.001	Pyrus communis subsp. pyraster	OPR-001	-0.0188276	0.00297957	-0.0039523	0.0165311	Communis	Occidental	Admixed	P. communis E	Pyrus communis hybrid
PI 541790	CPYR_1376.001	Pyrus hybrid	P. betulifolia-1 x P-12	0.0492902	-0.0386773	-0.080035	-0.00925415	Group3	Oriental	P. betulaefolia	-
PI 541791	CPYR_1377.001	Pyrus hybrid	P. betulifolia-1 x P-79	0.0147155	-0.0171151	-0.0399718	-0.00239035	between European and Asian	Admixed	US Oregon	-
PI 540981	CPYR_1378.001	Pyrus betulifolia	OPR-259 P. betulifolia	0.049129	-0.0388093	-0.080098	-0.00887553	Group3	Oriental	P. betulaefolia	-
PI 540982	CPYR_1379.001	Pyrus betulifolia	OPR-260 P. betulifolia	0.0492893	-0.0387257	-0.0800854	-0.00875531	Group3	Oriental	P. betulaefolia	-
PI 541707	CPYR_138.001	Pyrus hybrid	Cincincis	0.0105985	-0.00455023	0.0240549	0.00104741	between European and Asian	Admixed	South-East US	-
PI 540983	CPYR_1380.001	Pyrus betulifolia	OPR-261 P. betulifolia	0.0494468	-0.038858	-0.080332	-0.00898423	Group3	Oriental	P. betulaefolia	-
PI 540984	CPYR_1381.001	Pyrus betulifolia	OPR-262 P. betulifolia	0.0491879	-0.0380464	-0.0788298	-0.00878454	Group3	Oriental	P. betulaefolia	-
PI 540985	CPYR_1382.001	Pyrus betulifolia	OPR-263 P. betulifolia	0.049347	-0.0388547	-0.0806412	-0.00906484	Group3	Oriental	P. betulaefolia	-
PI 540987	CPYR_1384.001	Pyrus betulifolia	OPR-265 P. betulifolia	0.049268	-0.0389772	-0.0810716	-0.00880202	Group3	Oriental	P. betulaefolia	-
PI 540988	CPYR_1385.001	Pyrus betulifolia	OPR-266 P. betulifolia	0.0477622	-0.036648	-0.0772499	-0.00789539	Group3	Oriental	P. betulaefolia	-
PI 325930	CPYR_1389.001	Pyrus dimorphophylla	P. dimorphophylla Vo-29	0.0419075	-0.00880884	-0.022477	-0.00116142	Group3	Oriental	P. dimorphopylla & fauriei	-
PI 541163	CPYR_139.004	Pyrus communis	Citron de Carmes (Madeleine)	-0.019987	-0.000755242	-0.00247059	0.0147572	Communis	Occidental	Communis E	P. communis E
PI 325930	CPYR_1390.001	Pyrus dimorphophylla	P. dimorphophylla - Japan	0.0424106	-0.00863454	-0.0222279	-0.00126694	Group3	Oriental	P. dimorphopylla & fauriei	-
PI 325930	CPYR_1391.001	Pyrus dimorphophylla	P. dimorphophylla - Japan	0.0424129	-0.00821095	-0.0212553	-0.00109731	Group3	Oriental	P. dimorphopylla & fauriei	-
PI 541606	CPYR_1393.001	Pyrus dimorphophylla	P. dimorphophylla 408 seedling C	0.042575	-0.00841413	-0.0221891	-0.00145846	Group3	Oriental	P. dimorphopylla & fauriei	-
PI 541607	CPYR_1399.001	Pyrus dimorphophylla	P. dimorphophylla 407 seedling B	0.0418564	-0.00825934	-0.0219142	-0.00193922	Group3	Oriental	P. dimorphopylla & fauriei	-
PI 430890	CPYR_1402.001	Pyrus communis	Domestic pear - Ontario Selection	-0.0232666	-0.0275854	0.00905041	-0.0103329	Communis	Occidental	Admixed_Communis	P. communis A
PI 541431	CPYR_1404.001	Pyrus communis	Harrow Delight (HW 603)	-0.0243382	-0.0345906	0.0116274	-0.0124839	Communis	Occidental	Admixed_Communis	P. communis J
PI 541361	CPYR_141.002	Pyrus communis	Colonel Marchand	-0.0226335	-0.0229463	0.00696816	-0.0177164	Communis	Occidental	Admixed_Communis	P. communis J
PI 541960	CPYR_1419.004	Pyrus communis	MM-38	-0.0206221	-0.0089274	0.000582739	0.00400632	Communis	Occidental	Admixed_Communis	P. communis F	Pyrus communis hybrid
PI 541165	CPYR_142.005	Pyrus communis	Colonel Wilder	-0.0207867	-0.0172276	0.00472201	-0.0149793	Communis	Occidental	Communis D	P. communis F
PI 541434	CPYR_1421.001	Pyrus communis	P. communis OHxF?	-0.0161722	0.0118609	-0.00745991	0.0311362	Communis	Occidental	Admixed	P. communis hybrid	Pyrus communis hybrid
PI 541368	CPYR_1422.001	Pyrus communis	OPR-013 OHxF C-34	-0.0208049	-0.0113534	0.00170374	0.00222206	Communis	Occidental	Admixed_Communis	P. communis J	Pyrus communis hybrid
PI 617520	CPYR_1427.001	Pyrus calleryana	OPR-168 P. calleryana	0.0488369	-0.0262252	-0.0388652	0.00556107	Group3	Oriental	P. calleryana & koehnei	-
PI 264695	CPYR_143.002	Pyrus communis	Coloree de Juillet	-0.0223085	-0.0191882	0.00531785	-0.00746224	Communis	Occidental	Admixed_Communis	P. communis F
PI 541068	CPYR_1432.001	Pyrus calleryana	OPR-193 P. calleryana	0.0493312	-0.0263144	-0.036278	0.00644413	Group3	Oriental	P. calleryana & koehnei	-
PI 541071	CPYR_1435.001	Pyrus calleryana	P. calleryana	0.0464223	-0.0245282	-0.0348137	0.00639381	Group3	Oriental	P. calleryana & koehnei	-
PI 541072	CPYR_1436.001	Pyrus calleryana	OPR-177 P. calleryana	0.0492261	-0.0260945	-0.0366094	0.0065542	Group3	Oriental	P. calleryana & koehnei	-
PI 541073	CPYR_1437.001	Pyrus calleryana	P. calleryana [C-44?]	0.049163	-0.0261896	-0.0359946	0.00660397	Group3	Oriental	P. calleryana & koehnei	-
PI 541074	CPYR_1438.001	Pyrus calleryana	OPR-191 P. calleryana	0.0490868	-0.0251279	-0.0355408	0.0066748	Group3	Oriental	P. calleryana & koehnei	-
PI 541075	CPYR_1439.001	Pyrus calleryana	Autumn Blaze (P. calleryana)	0.0493185	-0.0266605	-0.0373116	0.00636568	Group3	Oriental	P. calleryana & koehnei	-
PI 541166	CPYR_144.001	Pyrus communis	Columbia	-0.0195038	-0.0136286	0.00525284	-0.0086266	Communis	Occidental	Admixed_Communis	P. communis E
PI 541076	CPYR_1440.001	Pyrus calleryana	OPR-195 P. calleryana 6 OP	0.0487984	-0.0262214	-0.03753	0.00658423	Group3	Oriental	P. calleryana & koehnei	-
PI 540989	CPYR_1441.001	Pyrus betulifolia	P. betulifolia	0.0493371	-0.0387116	-0.0806131	-0.00922902	Group3	Oriental	P. betulaefolia	-
PI 540990	CPYR_1442.001	Pyrus betulifolia	P. betulifolia	0.049351	-0.0386549	-0.0800158	-0.00919299	Group3	Oriental	P. betulaefolia	-
PI 540991	CPYR_1443.001	Pyrus betulifolia	P. betulifolia	0.0494386	-0.0388134	-0.0807902	-0.00910808	Group3	Oriental	P. betulaefolia	-
PI 541792	CPYR_1449.001	Pyrus hybrid	P. hybrid (calleryana)	0.0492928	-0.0270993	-0.0382646	0.00751083	Group3	Oriental	P. calleryana & koehnei	-	Pyrus calleryana
PI 541793	CPYR_1450.001	Pyrus hybrid	P. hybrid from Millikan	0.0491331	-0.02693	-0.0377108	0.00752071	Group3	Oriental	P. calleryana & koehnei	-	Pyrus calleryana
PI 541794	CPYR_1451.001	Pyrus hybrid	P. calleryana hybrid	0.0491431	-0.0262894	-0.0367411	0.00732063	Group3	Oriental	P. calleryana & koehnei	-	Pyrus calleryana
PI 541077	CPYR_1452.001	Pyrus calleryana	P. calleryana	0.0492391	-0.0261911	-0.0361949	0.00735143	Group3	Oriental	P. calleryana & koehnei	-
PI 541795	CPYR_1453.001	Pyrus hybrid	P. hybrid	0.0491238	-0.0265787	-0.0371361	0.0073508	Group3	Oriental	P. calleryana & koehnei	-	Pyrus calleryana
PI 541796	CPYR_1455.001	Pyrus hybrid	P. hybrid	0.0491458	-0.0263231	-0.0361588	0.00704632	Group3	Oriental	P. calleryana & koehnei	-	Pyrus calleryana
PI 325927	CPYR_1456.001	Pyrus dimorphophylla	P. dimorphophylla Vo-26	0.0425634	-0.00816964	-0.0220538	-0.00168283	Group3	Oriental	P. dimorphopylla & fauriei	-
PI 541609	CPYR_1457.001	Pyrus dimorphophylla	P. dimorphophylla 407	0.0422372	-0.00863221	-0.022298	-0.0011822	Group3	Oriental	P. dimorphopylla & fauriei	-
PI 540992	CPYR_1458.001	Pyrus betulifolia	P. betulifolia OSU-1	0.0492939	-0.0386783	-0.0802421	-0.00907983	Group3	Oriental	P. betulaefolia	-
PI 541078	CPYR_1460.001	Pyrus calleryana	P. calleryana	0.0449439	-0.0175962	-0.0248374	0.00538767	Group3	Oriental	P. calleryana & koehnei	-
PI 541925	CPYR_1464.001	Pyrus pyrifolia	P. pyrifolia Kor 2	0.0461342	0.0127434	0.0552286	0.00384078	Group4	Oriental	P. pyrifolia & ×sinkiangensis	-
PI 541435	CPYR_1465.001	Pyrus communis subsp. pyraster	P. communis ssp. pyraster Olez 5 - Turkey	-0.0183981	0.00916234	-0.00627639	0.0134953	Communis	Occidental	P. communis pyraster	P. communis pyraster
PI 541436	CPYR_1466.001	Pyrus communis subsp. pyraster	P. communis ssp. pyraster Olez 4 - Turkey	-0.0179973	0.0106879	-0.00681943	0.016939	Communis	Occidental	P. communis pyraster	P. communis pyraster
PI 617521	CPYR_1467.001	Pyrus communis subsp. pyraster	P. communis ssp. pyraster Olez 3 - Turkey	-0.0179702	0.0123902	-0.00803374	0.023235	Communis	Occidental	P. communis pyraster	P. communis pyraster
PI 617522	CPYR_1469.001	Pyrus elaeagrifolia	P. elaeagrifolia Olez 2 glabrous - Turkey	-0.00881474	0.050593	-0.0210052	-0.0150307	Group2	Occidental	Admixed_Group1	P. elaeagrifolia & syriaca	Pyrus hybrid
PI 617523	CPYR_1470.001	Pyrus elaeagrifolia	P. elaeagrifolia Olez 2 glabrous - Turkey	-0.00873029	0.0527352	-0.0220368	-0.0157061	Group2	Occidental	Admixed_Group1	P. elaeagrifolia & syriaca	Pyrus hybrid
PI 541651	CPYR_1472.001	Pyrus fauriei	P. fauriei	0.0424264	-0.00853627	-0.019438	-0.000517474	Group3	Oriental	P. dimorphopylla & fauriei	-
PI 541628	CPYR_1473.001	Pyrus elaeagrifolia	P. elaeagrifolia Olez 2	-0.00689598	0.0593654	-0.0236483	-0.0471865	Group2	Occidental	P. elaeagrifolia	P. elaeagrifolia & syriaca
PI 541797	CPYR_1474.001	Pyrus hybrid	P. pashia x P. calleryana	0.0462378	-0.0170413	-0.0245989	0.00400887	Group3	Oriental	P. calleryana & koehnei	-	Pyrus calleryana
PI 541798	CPYR_1478.001	Pyrus hybrid	P. betulifolia x P. pyrifolia	0.0478399	-0.0116682	-0.00916929	-0.0025921	between Group3 and 4	Oriental	Admixed	-
PI 541799	CPYR_1479.001	Pyrus hybrid	P. ussuriensis x P. calleryana	0.0414288	0.000290664	0.00463327	0.00176328	between Group3 and 4	Oriental	Admixed	-
PI 271658	CPYR_148.001	Pyrus communis	Doyenne du Comice	-0.0215623	-0.0198868	0.00558575	-0.0159586	Communis	Occidental	Admixed_Communis	P. communis F
PI 541800	CPYR_1480.001	Pyrus hybrid	Nelis x P. betulifolia	0.0152127	-0.0201053	-0.0369646	-0.0032704	between European and Asian	Admixed	US Oregon	-
PI 293846	CPYR_1482.001	Pyrus elaeagrifolia	P. elaeagrifolia - Crimea	-0.00877391	0.0529348	-0.0216015	-0.028854	Group2	Occidental	P. elaeagrifolia	P. elaeagrifolia & syriaca
PI 293846	CPYR_1483.001	Pyrus elaeagrifolia	P. elaeagrifolia - Crimea	-0.0075276	0.0510917	-0.0208292	-0.0305724	Group2	Occidental	P. elaeagrifolia	P. elaeagrifolia & syriaca
PI 540994	CPYR_1485.001	Pyrus betulifolia	P. betulifolia-2 x P. betulifolia-1	0.0493065	-0.0384252	-0.0796847	-0.00924364	Group3	Oriental	P. betulaefolia	-
PI 541437	CPYR_1489.001	Pyrus communis	Domestic Pear	-0.0240481	-0.0343287	0.011539	-0.0141711	Communis	Occidental	Admixed_Communis	P. communis G
PI 212579	CPYR_149.003	Pyrus communis	Comte de Chambord	-0.0200389	-0.0103535	0.001752	-0.00527991	Communis	Occidental	Admixed_Communis	P. communis J
PI 617525	CPYR_1490.001	Pyrus elaeagrifolia	P. elaeagrifolia QBZ glabrous	-0.00847484	0.0531868	-0.0214338	-0.0197221	Group2	Occidental	Admixed_Group1	P. elaeagrifolia & syriaca	Pyrus hybrid
PI 617526	CPYR_1494.001	Pyrus hybrid	P. betulifolia 2 x P. call. 2	0.0416127	-0.00837388	-0.0214752	-0.000723513	Group3	Oriental	P. dimorphopylla & fauriei	-	Pyrus dimorphophylla/fauriei
PI 541652	CPYR_1496.001	Pyrus fauriei	P. fauriei Rootstock Selection 12-14	0.0432797	-0.00989821	-0.0246836	-0.000932827	Group3	Oriental	P. dimorphopylla & fauriei	-
PI 541079	CPYR_1497.001	Pyrus calleryana	OPR-132 P. calleryana	0.0483829	-0.0256884	-0.0365768	0.00567775	Group3	Oriental	P. calleryana & koehnei	-
PI 540986	CPYR_1498.001	Pyrus betulifolia	P. betulifolia 3 No. 6	0.0480423	-0.0374301	-0.0776288	-0.00871743	Group3	Oriental	P. betulaefolia	-
PI 541167	CPYR_150.002	Pyrus communis	Comte de Lambertye	-0.0227958	-0.0304154	0.00990847	-0.0176003	Communis	Occidental	Admixed_Communis	P. communis J
PI 478004	CPYR_1501.007	Pyrus ussuriensis	P. ussuriensis 'McDermand' (Harbin)	0.0347601	0.0273944	0.0492289	-0.00225869	Group4	Oriental	P. ussuriensis	-
PI 541983	CPYR_1509.002	Pyrus syriaca	P. syriaca No. 1 - Syria	-0.00430037	0.0626418	-0.0238824	-0.0454623	Group2	Occidental	Group2	P. elaeagrifolia & syriaca
PI 541983	CPYR_1509.005	Pyrus syriaca	P. syriaca No. 1 - Syria	-0.0137406	0.0193999	-0.00853411	-0.0238312	Communis	Occidental	Admixed	P. communis E	Pyrus hybrid
PI 280031	CPYR_151.002	Pyrus communis	Comte de Lamy	-0.0201161	-0.00880059	0.00180755	-0.00793979	Communis	Occidental	Admixed_Communis	P. communis F
PI 541980	CPYR_1510.008	Pyrus syriaca	P. syriaca No. 2 - Syria	-0.00225787	0.0610644	-0.0232978	-0.0452305	Group2	Occidental	Admixed_Group1	P. elaeagrifolia & syriaca
PI 541444	CPYR_1516.002	Pyrus communis	Stuttgarter-Geishirtle (= Zuckerbirne)	-0.018108	0.00550526	-0.00417173	0.0077495	Communis	Occidental	Admixed	P. communis E	Pyrus communis hybrid
PI 483369	CPYR_1523.006	Pyrus communis	Bojka	-0.0184989	0.000564846	-0.00259027	0.00773767	Communis	Occidental	Admixed	P. communis D	Pyrus communis hybrid
PI 483372	CPYR_1526.002	Pyrus hybrid	Ilinka	-0.0173686	0.00927894	-0.00684486	0.031452	Communis	Occidental	Admixed	P. communis hybrid
PI 483374	CPYR_1528.002	Pyrus communis subsp. pyraster	Krolewka	-0.0169777	0.0151958	-0.00866182	0.0267492	Communis	Occidental	Admixed	P. communis hybrid	Pyrus communis hybrid
PI 483378	CPYR_1532.002	Pyrus communis	Wilenska Plenna	-0.0195188	-0.00331753	-0.00139343	0.0111716	Communis	Occidental	Admixed	P. communis E	Pyrus communis hybrid
PI 483380	CPYR_1534.002	Pyrus hybrid	Prague No. 2	-0.0183531	-0.000907971	-0.00103204	0.00711809	Communis	Occidental	Admixed	P. communis D
PI 483382	CPYR_1536.002	Pyrus communis subsp. pyraster	Ananaska Ceska	-0.0235704	-0.0290097	0.00945165	-0.0119479	Communis	Occidental	Admixed_Communis	P. communis F	Pyrus communis
PI 483383	CPYR_1537.001	Pyrus communis subsp. pyraster	P. communis ssp. pyraster - Poland	-0.0175847	0.0120177	-0.00778057	0.0359217	Communis	Occidental	Admixed	P. communis hybrid	Pyrus communis hybrid
PI 483384	CPYR_1538.001	Pyrus communis subsp. pyraster	P. communis ssp. pyraster - Poland	-0.0178446	0.00840175	-0.00614023	0.0264796	Communis	Occidental	P. communis pyraster	P. communis pyraster
PI 483385	CPYR_1539.001	Pyrus communis subsp. pyraster	P. communis ssp. pyraster - Poland	-0.0179862	0.00846925	-0.00602816	0.0221936	Communis	Occidental	P. communis pyraster	P. communis pyraster
PI 483386	CPYR_1540.001	Pyrus communis subsp. pyraster	P. communis ssp. pyraster - Poland	-0.0187685	0.00299701	-0.00393822	0.0170476	Communis	Occidental	Admixed	P. communis E	Pyrus communis hybrid
PI 483387	CPYR_1541.001	Pyrus communis	Krupen Burnusus	-0.0171857	0.0148702	-0.00937709	0.0260892	Communis	Occidental	Admixed	P. communis hybrid	Pyrus communis hybrid
PI 483393	CPYR_1547.001	Pyrus communis	Zelinka	-0.0182953	0.00599767	-0.00472278	0.00941747	Communis	Occidental	Admixed	P. communis E	Pyrus communis hybrid
PI 483399	CPYR_1549.002	Pyrus communis subsp. pyraster	Mednik	-0.0184694	0.00679286	-0.00559799	0.0125364	Communis	Occidental	P. communis pyraster	P. communis pyraster
PI 483401	CPYR_1551.002	Pyrus communis subsp. pyraster	Crna Poloska	-0.0175387	0.0125716	-0.00822532	0.0278719	Communis	Occidental	Admixed	P. communis hybrid	Pyrus communis hybrid
PI 483403	CPYR_1553.001	Pyrus communis subsp. pyraster	Aniversarea	-0.0227604	-0.0239631	0.00703371	-0.0116773	Communis	Occidental	Admixed_Communis	P. communis F	Pyrus communis
PI 541168	CPYR_156.001	Pyrus communis	Conference	-0.0210777	-0.0172391	0.00491603	-0.0131856	Communis	Occidental	Admixed_Communis	P. communis J
PI 541405	CPYR_1572.001	Pyrus communis	OHxF 333	-0.0236721	-0.0316341	0.0102667	-0.00873005	Communis	Occidental	Admixed_Communis	P. communis J
PI 506364	CPYR_1574.001	Pyrus hondoensis	P. hondoensis 'Iwate Mukaku'	0.040887	0.0154435	0.0428402	0.00131465	Group4	Oriental	Admixed	-	Pyrus pyrifolia/ussuriensis hybrid
PI 506365	CPYR_1575.001	Pyrus hondoensis	P. hondoensis 'Iwate Yamanashi'	0.0432507	0.0126313	0.0430014	0.00201484	Group4	Oriental	Admixed	-	Pyrus pyrifolia/ussuriensis hybrid
PI 312147	CPYR_1576.001	Pyrus communis	P. hybrid - Alma-ata (rec. as P. communis)	-0.0115738	0.00363219	0.000610793	-0.0020339	between European and Asian- but close to Communis	Occidental	Admixed	P. communis F	Pyrus hybrid
PI 506368	CPYR_1577.001	Pyrus hondoensis	Iwate No. 1	0.0424791	0.0151928	0.0485135	0.00165983	Group4	Oriental	Admixed	-	Pyrus pyrifolia/ussuriensis hybrid
PI 506369	CPYR_1581.001	Pyrus hondoensis	P. hondoensis - Iwate No. 4	0.04149	0.0148445	0.044777	0.00158721	Group4	Oriental	Admixed	-	Pyrus pyrifolia/ussuriensis hybrid
PI 541450	CPYR_1585.001	Pyrus communis	Domestic Pear (OSU Seedling B) - looks like Bosc	-0.0232334	-0.0311843	0.0109859	-0.0219302	Communis	Occidental	Admixed_Communis	P. communis F
PI 541451	CPYR_1586.001	Pyrus communis	Domestic Pear (OSU Seedling C)	-0.022323	-0.0237715	0.00689612	-0.0101482	Communis	Occidental	Admixed_Communis	P. communis F
PI 541082	CPYR_1587.003	Pyrus calleryana	P. calleryana - Crown Point 5-67	0.0486671	-0.0246915	-0.0343418	0.00628737	Group3	Oriental	P. calleryana & koehnei	-
PI 541590	CPYR_1588.001	Pyrus cordata	P. cordata - Turkey	-0.00839256	0.0484813	-0.0211334	-0.0153653	Group1	Occidental	P. cordata & mamorensis	P. cordata
PI 541591	CPYR_1589.001	Pyrus cordata	P. cordata - Turkey	-0.00830877	0.0507576	-0.021873	-0.016083	Group1	Occidental	P. cordata & mamorensis	P. cordata
PI 292656	CPYR_159.002	Pyrus communis	Coscia	-0.0213907	-0.015185	0.00366648	0.00152233	Communis	Occidental	Admixed_Communis	P. communis G
PI 541867	CPYR_1590.001	Pyrus nivalis	P. nivalis Y-5	-0.0174126	0.00554317	-0.00480929	0.00236873	Communis	Occidental	Admixed	P. communis A	Pyrus communis hybrid
PI 641273	CPYR_1591.001	Pyrus pyrifolia	P. pyrifolia (hybrid)	0.0197812	0.0240058	0.0242216	0.0158187	between European and Asian- but close to Group4	Admixed	Central-South Asia	-	Pyrus hybrid
PI 541452	CPYR_1592.001	Pyrus communis	P. communis - root aphid resistant	-0.017992	0.00974714	-0.00654507	0.0180814	Communis	Occidental	P. communis pyraster	P. communis pyraster	Pyrus communis subsp. pyraster
PI 541683	CPYR_1593.001	Pyrus hondoensis	P. hondoensis	0.0447738	0.00943362	0.0377893	0.000391177	Group4	Oriental	Admixed	-	Pyrus pyrifolia/ussuriensis hybrid
PI 541685	CPYR_1595.005	Pyrus hondoensis	P. hondoensis	0.0450192	0.0105157	0.0433919	0.00141543	Group4	Oriental	Admixed	-	Pyrus pyrifolia/ussuriensis hybrid
PI 541687	CPYR_1597.001	Pyrus hondoensis	P. hondoensis	0.0440448	0.00978734	0.0366111	-6.15235e-05	Group4	Oriental	Admixed	-	Pyrus pyrifolia/ussuriensis hybrid
PI 540934	CPYR_1598.001	Pyrus spinosa	P. spinosa (amygdaliformis) - Sardinia	-0.00880649	0.0666373	-0.0283313	-0.071839	Group2	Occidental	P. spinosa	P. spinosa
PI 540936	CPYR_1600.001	Pyrus spinosa	P. spinosa (amygdaliformis) - Sardinia	-0.009016	0.0662661	-0.0281979	-0.0728799	Group2	Occidental	P. spinosa	P. spinosa
PI 541083	CPYR_1601.001	Pyrus calleryana	P. calleryana OSU-10	0.0497581	-0.0269296	-0.0368607	0.00680297	Group3	Oriental	P. calleryana & koehnei	-
PI 541564	CPYR_1602.001	Pyrus communis subsp. caucasica	P. communis ssp. caucasica - P. Stark	-0.0153183	0.0269658	-0.0147284	0.0848116	Communis	Occidental	P. communis caucasica	P. communis caucasica A
PI 293845	CPYR_1603.001	Pyrus hybrid	P. elaeagrifolia hybrid - Crimea	-0.0104548	0.0459516	-0.0195783	-0.00781987	Group1	Occidental	Admixed_Group1	P. elaeagrifolia & syriaca
PI 293843	CPYR_1604.001	Pyrus hybrid	P. elaeagrifolia hybrid - Crimea	-0.00887706	0.0512446	-0.0215356	-0.025786	Group1/2	Occidental	P. elaeagrifolia	P. elaeagrifolia & syriaca	Pyrus elaeagrifolia
PI 293844	CPYR_1605.001	Pyrus hybrid	P. elaeagrifolia hybrid - Crimea	-0.0116065	0.04019	-0.0174579	-0.00154728	Group1	Occidental	Admixed_Group1	P. elaeagrifolia & syriaca
PI 541929	CPYR_1606.001	Pyrus pyrifolia	P. pyrifolia	0.0456926	0.0125042	0.0533707	0.00292243	Group4	Oriental	P. pyrifolia & ×sinkiangensis	-
PI 541453	CPYR_1607.001	Pyrus communis	P. communis (Imp. Fr.)	-0.0182479	0.00842501	-0.0059345	0.0185836	Communis	Occidental	P. communis pyraster	P. communis pyraster	Pyrus communis subsp. pyraster
PI 540937	CPYR_1608.001	Pyrus spinosa	P. spinosa (amygdaliformis) - Greece (Epires)	-0.00848597	0.0653546	-0.027988	-0.0730632	Group2	Occidental	P. spinosa	P. spinosa
PI 540938	CPYR_1609.003	Pyrus spinosa	P. spinosa (amygdaliformis) - Turkey	-0.00856387	0.0685683	-0.0291089	-0.0755048	Group2	Occidental	P. spinosa	P. spinosa
PI 540939	CPYR_1610.001	Pyrus spinosa	P. spinosa (amygdaliformis) - Turkey	-0.00889211	0.0670532	-0.0285815	-0.0739478	Group2	Occidental	P. spinosa	P. spinosa
PI 540940	CPYR_1611.001	Pyrus spinosa	P. spinosa (amygdaliformis) - Turkey	-0.00864048	0.0678707	-0.0289939	-0.0760192	Group2	Occidental	P. spinosa	P. spinosa
PI 540941	CPYR_1612.001	Pyrus spinosa	P. spinosa (amygdaliformis) - Turkey	-0.00857178	0.0668844	-0.0284359	-0.0738067	Group2	Occidental	P. spinosa	P. spinosa
PI 541454	CPYR_1613.001	Pyrus communis	OHxF 58	-0.0225451	-0.0264497	0.0082076	-0.0127854	Communis	Occidental	Admixed_Communis	P. communis J
PI 541084	CPYR_1614.001	Pyrus calleryana	P. calleryana (hybrid)	0.0124312	-0.0230805	-0.0136296	-0.00473644	between European and Asian	Admixed	Admixed	-	Pyrus hybrid
PI 349023	CPYR_1615.001	Pyrus spinosa	P. spinosa (amygdaliformis) - Macedonia (long chill required)	-0.00993615	0.0607677	-0.0261227	-0.0674599	Group2	Occidental	P. spinosa	P. spinosa
PI 542022	CPYR_1617.002	Pyrus ×bretschneideri	Xiangshui Li [Hsiang Sui-Li]	0.0411617	0.015159	0.0468313	0.000957276	Group4	Oriental	Admixed	-	Pyrus pyrifolia/ussuriensis hybrid
PI 449288	CPYR_162.001	Pyrus communis	Vicar of Winkfield	-0.0162984	0.00319626	-0.00233101	-0.00131333	Communis	Occidental	Admixed	P. communis E
PI 541961	CPYR_1620.001	Pyrus communis	Unknown Cultivar [Bartlett type but round]	-0.0220113	-0.0265364	0.00911776	-0.00998069	Communis	Occidental	Admixed_Communis	P. communis J
PI 502166	CPYR_1626.001	Pyrus communis	Saafaranja	-0.0182238	0.00671717	-0.00511345	0.0117626	Communis	Occidental	Admixed	P. communis pyraster	Pyrus communis hybrid
PI 502167	CPYR_1627.001	Pyrus communis	Sarajka	-0.0182949	0.00703903	-0.00617419	0.0323072	Communis	Occidental	Admixed	P. communis hybrid	Pyrus communis hybrid
PI 502170	CPYR_1630.001	Pyrus communis	Edmundka	-0.0226232	-0.0252567	0.00766354	-0.0167517	Communis	Occidental	Admixed_Communis	P. communis J
PI 502171	CPYR_1631.001	Pyrus communis	Clapp Favorite	-0.024037	-0.0339451	0.0123182	-0.0148347	Communis	Occidental	Admixed_Communis	P. communis J
PI 502173	CPYR_1633.001	Pyrus communis subsp. pyraster	P. communis ssp. pyraster - Poland	-0.0181353	0.00702503	-0.00544	0.0277127	Communis	Occidental	P. communis pyraster	P. communis pyraster
PI 502175	CPYR_1635.001	Pyrus communis	Urechelnite	-0.0177595	0.00879638	-0.0056849	0.0173145	Communis	Occidental	Admixed	P. communis E	Pyrus communis hybrid
PI 502178	CPYR_1638.001	Pyrus communis	P. communis - Macedonia (Smiljevka?)	-0.01802	0.0089529	-0.00663392	0.0225281	Communis	Occidental	Admixed	P. communis hybrid	Pyrus communis hybrid
PI 502179	CPYR_1639.001	Pyrus hybrid	Sbkta (P. elaeagrifolia)	-0.0125403	0.036418	-0.0155532	-0.0301609	Communis/Group1	Occidental	Admixed	P. elaeagrifolia & syriaca
PI 502180	CPYR_1640.001	Pyrus communis	P. communis - Macedonia	-0.01719	0.0106069	-0.00723198	0.0155057	Communis	Occidental	Admixed	P. communis hybrid	Pyrus communis hybrid
PI 541459	CPYR_1646.001	Pyrus communis	Coscia (Precoce?)	-0.0199669	-0.00743805	0.00141615	0.00985727	Communis	Occidental	Admixed_Communis	P. communis A	Pyrus communis hybrid
PI 541805	CPYR_1648.001	Pyrus pyrifolia	Koyama Pear	0.0467183	0.015917	0.0667579	0.00415458	Group4	Oriental	P. pyrifolia & ×sinkiangensis	-
PI 541169	CPYR_165.001	Pyrus communis	Dana Hovey	-0.0214745	-0.0150496	0.00420622	-0.0122164	Communis	Occidental	Admixed_Communis	P. communis I
PI 46582	CPYR_1650.001	Pyrus ×phaeocarpa	P. x phaeocarpa	0.043935	8.88854e-05	0.00951602	0.000621457	between Group3 and 4	Oriental	Admixed	-	Pyrus hybrid
PI 141256	CPYR_1652.001_2	Pyrus communis	Madame Treyve	-0.0229171	-0.0263092	0.0082789	-0.0130679	Communis	Occidental	Admixed_Communis	P. communis J
PI 541807	CPYR_1658.001	Pyrus hybrid	NY 10262	0.00843049	-0.00967781	0.0330877	-0.00470159	between European and Asian	Admixed	Admixed	-
PI 541809	CPYR_1660.001	Pyrus hybrid	NY 10353	-0.00429615	-0.0184064	0.0284454	-0.00992808	between European and Asian	Occidental	Admixed	P. communis F
PI 506385	CPYR_1663.001	Pyrus hybrid	Para de Zahar de Bihor	-0.0182215	0.00907456	-0.00593152	0.00168442	Communis	Occidental	Admixed	P. communis E
PI 506388	CPYR_1664.001	Pyrus communis	Poznica	-0.0181659	0.00676309	-0.00554319	0.0297387	Communis	Occidental	Admixed	P. communis E	Pyrus communis hybrid
PI 506363	CPYR_1666.001	Pyrus ussuriensis	Sotoorihime	0.0425158	0.0132769	0.0436242	0.00158712	Group4	Oriental	Admixed	-	Pyrus pyrifolia/ussuriensis hybrid
PI 506378	CPYR_1670.001	Pyrus communis	Romania Perry Pear	-0.0188899	0.00122383	-0.00273488	0.00367075	Communis	Occidental	Admixed	P. communis E	Pyrus communis hybrid
PI 506380	CPYR_1671.001	Pyrus communis subsp. pyraster	P. communis ssp. pyraster - Romania	-0.0177006	0.00970509	-0.00654811	0.0277681	Communis	Occidental	P. communis pyraster	P. communis pyraster
PI 506376	CPYR_1673.001	Pyrus hybrid	Saprani II	-0.0157005	0.0152765	-0.00914165	0.0414243	Communis	Occidental	Admixed	P. communis hybrid
PI 506373	CPYR_1674.002	Pyrus communis subsp. pyraster	P. communis ssp. pyraster - Serbia	-0.0197583	-0.0024715	-0.00178972	0.00742163	Communis	Occidental	Communis E	P. communis A	Pyrus communis
PI 506371	CPYR_1677.001	Pyrus hybrid	Panajurka	-0.0173701	0.0125228	-0.00796105	0.0290168	Communis	Occidental	Admixed	P. communis hybrid
PI 506362	CPYR_1678.001	Pyrus ×bretschneideri	Ya Li	0.0481355	0.0103827	0.0558164	0.00399656	Group4	Oriental	P. pyrifolia & ×sinkiangensis	-	Pyrus pyrifolia
PI 541170	CPYR_168.001	Pyrus communis	Dawn	-0.0232425	-0.0308828	0.0103735	-0.017131	Communis	Occidental	Admixed_Communis	P. communis J
PI 506379	CPYR_1684.001	Pyrus communis subsp. pyraster	P. communis ssp. pyraster - Romania	-0.0170975	0.0110046	-0.00680599	0.024825	Communis	Occidental	P. communis pyraster	P. communis pyraster
PI 506372	CPYR_1687.002	Pyrus communis	Roosevelt	-0.0215566	-0.017447	0.00549233	-0.0162915	Communis	Occidental	Admixed_Communis	P. communis D
PI 506377	CPYR_1689.001	Pyrus hybrid	Winioska-Saska	-0.0220051	-0.0200709	0.00520851	-0.00993677	Communis	Occidental	Admixed_Communis	P. communis F	Pyrus communis
PI 541171	CPYR_169.002	Pyrus communis	Delices d'Avril	-0.0184035	-0.00209739	3.06648e-05	0.00300591	Communis	Occidental	Admixed_Communis	P. communis A
PI 506383	CPYR_1690.003	Pyrus communis	Tamiioase de Calinesti	-0.0189965	-0.0140689	0.00567879	-0.0119807	Communis	Occidental	Admixed_Communis	P. communis B
PI 541953	CPYR_1697.001	Pyrus salicifolia	P. salicifolia (hybrid) - Russia	-0.0137707	0.0273561	-0.0131739	0.0148925	Communis/Group1	Occidental	Admixed	P. communis hybrid	Pyrus hybrid
PI 541953	CPYR_1697.002	Pyrus salicifolia	P. salicifolia (hybrid) - Russia	-0.0138719	0.0289947	-0.0146057	0.0406823	Communis/Group1	Occidental	Admixed	P. salicifolia & sachokiana	Pyrus hybrid
PI 541303	CPYR_17.001	Pyrus communis	Duchesse d'Angouleme	-0.0217439	-0.021475	0.00620244	-0.0122142	Communis	Occidental	Communis C	P. communis F
PI 277420	CPYR_170.001	Pyrus hybrid	Dessertnaia	-0.0213894	-0.0150546	0.00388296	-0.00403831	Communis	Occidental	Admixed_Communis	P. communis F	Pyrus communis hybrid
PI 541465	CPYR_1700.002	Pyrus communis	Perazola	-0.0184163	0.0080281	-0.00580408	0.0103258	Communis	Occidental	Admixed	P. communis pyraster	Pyrus communis hybrid
PI 541812	CPYR_1702.001	Pyrus hybrid	South Dakota E-31	-0.00397424	-0.00555332	0.0145657	0.00411674	between European and Asian	Occidental	Admixed	P. communis J
PI 541810	CPYR_1703.001	Pyrus hybrid	P. hybrid V-103 - Nepal	0.0136579	0.00646021	0.0262152	-0.0037464	between European and Asian	Admixed	Admixed	-
PI 541468	CPYR_1705.001	Pyrus communis	P. communis o.p. - Uzbekistan	0.0328904	-0.00630525	-0.00257058	0.0107372	between Group3 and 4	Oriental	Admixed	-	Pyrus hybrid
PI 541468	CPYR_1705.002	Pyrus communis	P. communis o.p. - Uzbekistan	0.0300748	-0.00267694	0.00162027	0.00955951	between Group3 and 4	Oriental	Admixed	-	Pyrus hybrid
PI 541468	CPYR_1705.003	Pyrus communis	P. communis o.p. - Uzbekistan	0.0345787	-0.0071777	-0.00381794	0.00746352	between Group3 and 4	Oriental	Admixed	-	Pyrus hybrid
PI 541087	CPYR_1707.001	Pyrus calleryana	P. calleryana o.p. - Uzbekistan	0.0485224	-0.0142423	-0.00939163	0.00500629	Group3	Oriental	Admixed	-	Pyrus hybrid
PI 542035	CPYR_1708.005	Pyrus ×canescens	P. x canescens 1213 - Uzbekistan	-0.0177454	0.00432363	-0.00392169	-0.00303273	Communis	Occidental	Admixed	P. communis E	Pyrus hybrid
PI 279333	CPYR_171.002	Pyrus communis	Urbaniste	-0.0211348	-0.0194485	0.00567358	-0.0116064	Communis	Occidental	Admixed_Communis	P. communis J
PI 541469	CPYR_1710.001	Pyrus communis	P. communis o.p. - Uzbekistan	-0.00932736	0.0145539	0.000910569	0.0183722	between European and Asian- but close to Communis and Group1	Occidental	Admixed	P. communis hybrid	Pyrus communis hybrid
PI 541630	CPYR_1711.001	Pyrus elaeagrifolia	P. elaeagrifolia hybrid - Uzbekistan	-0.0183717	0.00268354	-0.00263066	0.0257267	Communis	Occidental	Admixed	P. communis hybrid	Pyrus communis hybrid
PI 541869	CPYR_1714.001	Pyrus nivalis	P. nivalis 1219 - Uzbekistan	-0.0172605	0.0113131	-0.00826641	0.0655006	Communis	Occidental	Admixed	P. communis caucasica B	Pyrus communis hybrid
PI 541869	CPYR_1714.002	Pyrus nivalis	P. nivalis 1219 - Uzbekistan	-0.0174327	0.0123858	-0.00914694	0.0708938	Communis	Occidental	P. communis caucasica	P. communis caucasica B	Pyrus communis subsp. caucasica
PI 541869	CPYR_1714.003	Pyrus nivalis	P. nivalis 1219 - Tashkent sdlg. 3	-0.0162231	0.0172316	-0.0106739	0.0699803	Communis	Occidental	P. communis caucasica	P. communis caucasica B	Pyrus communis subsp. caucasica
PI 541869	CPYR_1714.004	Pyrus nivalis	P. nivalis 1219 - Uzbekistan	-0.0158402	0.0205662	-0.0124954	0.0785066	Communis	Occidental	P. communis caucasica	P. communis caucasica B	Pyrus communis subsp. caucasica
PI 541471	CPYR_1721.001	Pyrus communis	P. communis o.p. - Uzbekistan	-0.00941559	0.0101806	-0.0176738	0.0479929	between European and Asian- but close to Communis	Occidental	Admixed	P. communis hybrid	Pyrus communis hybrid
PI 541471	CPYR_1721.003	Pyrus communis	P. communis o.p. - Uzbekistan	-0.017053	0.0154362	-0.00935715	0.0526732	Communis	Occidental	Admixed	P. communis hybrid	Pyrus communis hybrid
PI 541471	CPYR_1721.004	Pyrus communis	P. communis o.p. - Uzbekistan	-0.0157953	0.0243029	-0.01406	0.087305	Communis	Occidental	P. communis caucasica	P. communis caucasica B	Pyrus communis subsp. caucasica
PI 541472	CPYR_1725.002	Pyrus communis	Cascade	-0.0232787	-0.0298525	0.0099442	-0.0192894	Communis	Occidental	Admixed_Communis	P. communis A
PI 541172	CPYR_173.001	Pyrus communis	Devoe	-0.0205987	-0.0175324	0.00582255	-0.00942604	Communis	Occidental	Admixed_Communis	P. communis F
PI 617503	CPYR_174.002	Pyrus communis	Directeur Hardy	-0.0214462	-0.0182135	0.00488387	-0.00801555	Communis	Occidental	Admixed_Communis	P. communis F
PI 541708	CPYR_175.002	Pyrus hybrid	Dixie	0.0119502	-0.012383	0.0256557	-0.0110628	between European and Asian	Admixed	South-East US	-
PI 324121	CPYR_176.001	Pyrus communis	Djebel Goutava	-0.024044	-0.0353732	0.0118999	-0.0239571	Communis	Occidental	Admixed_Communis	P. communis J
PI 541173	CPYR_177.004	Pyrus communis	Docteur Desportes	-0.0197089	-0.0169321	0.00563907	-0.0133746	Communis	Occidental	Admixed_Communis	P. communis J
PI 228012	CPYR_178.002	Pyrus pyrifolia	Doitsu	0.0467038	0.0160675	0.0677939	0.00432931	Group4	Oriental	P. pyrifolia & ×sinkiangensis	-
PI 541174	CPYR_179.002	Pyrus communis	Dorset	-0.0205025	-0.0139317	0.00340579	-0.00464804	Communis	Occidental	Admixed_Communis	P. communis A
PI 295089	CPYR_181.001	Pyrus communis	Doyenne d'Alecon	-0.0204941	-0.0144158	0.00390396	-0.00822759	Communis	Occidental	Admixed_Communis	P. communis F
PI 260197	CPYR_184.002	Pyrus communis	Doyenne de Juillet	-0.0226595	-0.0193604	0.00475058	0.00364191	Communis	Occidental	Admixed_Communis	P. communis A
PI 541362	CPYR_186.004	Pyrus communis	Doyenne de Saumur	-0.0218932	-0.0213237	0.00687243	-0.00185243	Communis	Occidental	Admixed_Communis	P. communis J
PI 255610	CPYR_189.003	Pyrus communis	Doyenne Flon Aine	-0.020031	-0.0190649	0.00625652	-0.0149264	Communis	Occidental	Admixed_Communis	P. communis F
PI 541176	CPYR_190.002	Pyrus communis	Doyenne Goubault	-0.0198119	-0.0150148	0.00523201	-0.0134884	Communis	Occidental	Admixed_Communis	P. communis F
PI 541178	CPYR_192.001	Pyrus communis	Docteur Jules Guyot (=Limonera)	-0.0244907	-0.0367033	0.0123769	-0.0190376	Communis	Occidental	Admixed_Communis	P. communis J
PI 541180	CPYR_196.002	Pyrus communis	Duchesse de Berry d'Ete	-0.0221706	-0.0207874	0.00649949	-0.00920432	Communis	Occidental	Admixed_Communis	P. communis A
PI 279330	CPYR_197.002	Pyrus communis	Duchesse de Bordeaux (= Beurré Perrault)	-0.0191743	-0.00914771	0.00225725	-0.00759035	Communis	Occidental	Admixed_Communis	P. communis F
PI 541181	CPYR_199.001	Pyrus communis	Duchesse de Brissac	-0.0226039	-0.0272748	0.00875631	-0.0170739	Communis	Occidental	Admixed_Communis	P. communis J
PI 541636	CPYR_2.006	Pyrus fauriei	P. fauriei - Korea OP seedling	0.0423037	-0.00964269	-0.0228777	-0.000774211	Group3	Oriental	P. dimorphopylla & fauriei	-
PI 541183	CPYR_202.003	Pyrus communis	Early Harvest (=Chambers)	-0.0194491	-0.00303588	-0.0013938	0.0118559	Communis	Occidental	Admixed	P. communis E
PI 541479	CPYR_2022.001	Pyrus communis	Laxinoua	-0.0194795	-0.00321227	-0.00130973	-0.00408446	Communis	Occidental	Admixed	P. communis E
PI 541485	CPYR_2028.003	Pyrus communis	Hessle	-0.0196412	-0.0084038	0.00148694	-0.00680198	Communis	Occidental	Admixed_Communis	P. communis H
PI 541486	CPYR_2029.001	Pyrus communis	Winnals Longdon	-0.0178054	0.00806103	-0.00587864	0.00765201	Communis	Occidental	Communis E	P. communis E
PI 541488	CPYR_2031.001	Pyrus communis	Olivier de Serres	-0.0213113	-0.019118	0.00621489	-0.0109864	Communis	Occidental	Admixed_Communis	P. communis F
PI 541489	CPYR_2032.002	Pyrus communis	Alexandrina Bivort	-0.0206883	-0.0087884	0.000701524	0.00228295	Communis	Occidental	Admixed_Communis	P. communis A
PI 541813	CPYR_2034.001	Pyrus ussuriensis	Shi Hua Li seedling	0.0478005	0.0112883	0.0576125	0.00402569	Group4	Oriental	P. pyrifolia & ×sinkiangensis	-	Pyrus pyrifolia
PI 324053	CPYR_2036.001	Pyrus hybrid	P. hybrid - Ukraine	-0.016003	0.0232214	-0.0128745	0.0527247	Communis	Occidental	Admixed	P. communis hybrid
PI 324027	CPYR_2037.001	Pyrus communis subsp. caucasica	P. communis ssp. caucasica - Stavropol	-0.0139663	0.0266254	-0.0148572	0.0922444	Communis	Occidental	P. communis caucasica	P. communis caucasica A
PI 324029	CPYR_2038.001	Pyrus communis subsp. caucasica	P. communis ssp. caucasica - Stavropol	-0.0183377	0.00931545	-0.00663219	0.0282847	Communis	Occidental	P. communis pyraster	P. communis hybrid	Pyrus communis subsp. pyraster
PI 541184	CPYR_204.001	Pyrus communis	Early Seckel	-0.0226227	-0.0251276	0.00824189	-0.0115601	Communis	Occidental	Admixed_Communis	P. communis A
PI 324031	CPYR_2040.001	Pyrus communis subsp. caucasica	P. communis ssp. caucasica - Stavropol	-0.0152222	0.0277937	-0.0153099	0.0978473	Communis	Occidental	P. communis caucasica	P. communis caucasica A
PI 324035	CPYR_2043.001	Pyrus communis subsp. caucasica	P. communis ssp. caucasica - Caucasus Mts. Russia	-0.0153	0.0269771	-0.0148622	0.0975902	Communis	Occidental	P. communis caucasica	P. communis caucasica A
PI 324038	CPYR_2045.001	Pyrus communis subsp. caucasica	P. communis ssp. caucasica - Caucasus Mts. Russia	-0.0151986	0.026795	-0.0153777	0.0979292	Communis	Occidental	P. communis caucasica	P. communis caucasica A
PI 324043	CPYR_2049.001	Pyrus communis subsp. caucasica	P. communis ssp. caucasica - Caucasus Mts. Russia	-0.0152744	0.0275629	-0.0157278	0.0979877	Communis	Occidental	P. communis caucasica	P. communis caucasica A
PI 392319	CPYR_205.002	Pyrus communis	Ecmianka	-0.0178975	0.011308	-0.00821235	0.034887	Communis	Occidental	Admixed	P. communis hybrid	Pyrus communis hybrid
PI 324044	CPYR_2050.001	Pyrus communis subsp. caucasica	P. communis ssp. caucasica - Caucasus Mts. Russia	-0.0153969	0.0280021	-0.0154911	0.0978738	Communis	Occidental	P. communis caucasica	P. communis caucasica A
PI 324047	CPYR_2053.001	Pyrus communis subsp. caucasica	P. communis ssp. caucasica - Caucasus Mts. Russia	-0.0151077	0.0278286	-0.0154322	0.0974807	Communis	Occidental	P. communis caucasica	P. communis caucasica A
PI 324050	CPYR_2056.001	Pyrus communis subsp. caucasica	P. communis ssp. caucasica - Caucasus Mts. Russia	-0.0154161	0.0281217	-0.0158015	0.0979052	Communis	Occidental	P. communis caucasica	P. communis caucasica A
PI 541490	CPYR_2057.001	Pyrus communis subsp. pyraster	P. communis ssp. pyraster 'Olez Brown' - Turkey	-0.0178965	0.0119761	-0.00771239	0.0194316	Communis	Occidental	P. communis pyraster	P. communis pyraster
PI 293842	CPYR_2059.001	Pyrus communis subsp. pyraster	P. communis ssp. pyraster - Moldavia	-0.0182766	0.00798898	-0.00591818	0.0184993	Communis	Occidental	P. communis pyraster	P. communis pyraster
PI 311714	CPYR_206.001	Pyrus communis	Eletta Morettini	-0.0203163	-0.0171245	0.00553019	-0.00769696	Communis	Occidental	Admixed_Communis	P. communis I
PI 293838	CPYR_2060.001	Pyrus communis subsp. pyraster	P. communis ssp. pyraster - Crimea	-0.0142781	0.0295255	-0.0146448	0.0374804	Communis	Occidental	Admixed	P. communis hybrid	Pyrus communis hybrid
PI 293842	CPYR_2062.001	Pyrus communis subsp. pyraster	P. communis ssp. pyraster - Moldavia	-0.018015	0.00966624	-0.00686486	0.023676	Communis	Occidental	P. communis pyraster	P. communis pyraster
PI 293837	CPYR_2064.001	Pyrus communis subsp. pyraster	P. communis ssp. pyraster - Crimea	-0.0159737	0.0214127	-0.0114852	0.0466906	Communis	Occidental	Admixed	P. communis hybrid	Pyrus communis hybrid
PI 293834	CPYR_2066.001	Pyrus communis subsp. pyraster	P. communis ssp. pyraster - Crimea	-0.0161958	0.0212957	-0.011884	0.0565839	Communis	Occidental	Admixed	P. communis hybrid	Pyrus communis hybrid
PI 293833	CPYR_2067.001	Pyrus communis subsp. pyraster	P. communis ssp. pyraster- Yedentsi Forest	-0.0182151	0.00810885	-0.00604891	0.0193078	Communis	Occidental	P. communis pyraster	P. communis pyraster
PI 293841	CPYR_2068.001	Pyrus communis subsp. pyraster	P. communis ssp. pyraster - Kholorash	-0.0180144	0.00895448	-0.00595695	0.019526	Communis	Occidental	P. communis pyraster	P. communis pyraster
PI 541089	CPYR_2086.001	Pyrus calleryana	OPR-156 P. calleryana	0.0484207	-0.0251181	-0.0349335	0.00655051	Group3	Oriental	P. calleryana & koehnei	-
PI 541092	CPYR_2089.001	Pyrus calleryana	OPR-187 P. calleryana	0.0492825	-0.0262465	-0.0362312	0.0064392	Group3	Oriental	P. calleryana & koehnei	-
PI 541094	CPYR_2091.001	Pyrus calleryana	OPR-138 P. calleryana	0.049443	-0.0276459	-0.0413824	0.00449051	Group3	Oriental	P. calleryana & koehnei	-
PI 541098	CPYR_2095.001	Pyrus calleryana	OPR-220 P. calleryana	0.0489142	-0.0253538	-0.0356813	0.0069429	Group3	Oriental	P. calleryana & koehnei	-
PI 290783	CPYR_210.003	Pyrus communis	Epine de Mai	-0.0186912	-0.0123377	0.00545753	-0.00980536	Communis	Occidental	Admixed_Communis	P. communis F
PI 541501	CPYR_2105.002	Pyrus communis	June Sugar	-0.0200296	-0.00475625	-0.00016725	0.0027394	Communis	Occidental	Admixed_Communis	P. communis E
PI 541688	CPYR_2109.001	Pyrus hondoensis	P. hondoensis	0.0448887	0.0102124	0.0396657	0.00122015	Group4	Oriental	Admixed	-	Pyrus pyrifolia/ussuriensis hybrid
PI 541505	CPYR_2110.004	Pyrus communis	Nova	-0.0217659	-0.0172016	0.0050709	3.13735e-05	Communis	Occidental	Admixed_Communis	P. communis D
PI 541507	CPYR_2113.002	Pyrus communis	Idaho	-0.0239282	-0.034474	0.0122378	-0.0224533	Communis	Occidental	Admixed_Communis	P. communis J
PI 541689	CPYR_2117.002	Pyrus hondoensis	P. hondoensis - Japan	0.0449598	0.00694579	0.0315457	0.00214703	Group4	Oriental	Admixed	-	Pyrus hybrid
PI 541510	CPYR_2118.001	Pyrus communis	Fin de Siecle	-0.0206352	-0.0154473	0.00401653	-0.00866629	Communis	Occidental	Admixed_Communis	P. communis F
PI 541511	CPYR_2119.002	Pyrus communis	Muscat	-0.0183516	0.00371735	-0.00375784	0.00657882	Communis	Occidental	Admixed	P. communis E
PI 541515	CPYR_2123.002	Pyrus communis	Beurré Naghin	-0.0191054	-0.0104033	0.00318183	-0.0144942	Communis	Occidental	Admixed_Communis	P. communis F
PI 541516	CPYR_2124.002	Pyrus communis	Doree de Bourgogne	-0.0175463	-0.00478408	0.00223768	-0.00464847	Communis	Occidental	Communis D	P. communis J
PI 541517	CPYR_2125.001	Pyrus communis	President Deviolaine	-0.0201873	-0.0176081	0.00548681	-0.0116239	Communis	Occidental	Admixed_Communis	P. communis F
PI 541519	CPYR_2127.002	Pyrus communis	Passe Colmar	-0.0213694	-0.0222737	0.00764471	-0.0143839	Communis	Occidental	Admixed_Communis	P. communis J
PI 541520	CPYR_2128.001	Pyrus communis	Swiss Bergamotte	-0.0194732	-0.00218372	-0.00197332	0.000222777	Communis	Occidental	Communis E	P. communis E
PI 541521	CPYR_2129.002	Pyrus communis	Pierre Corneille	-0.0224514	-0.0238938	0.00697744	-0.0121934	Communis	Occidental	Admixed_Communis	P. communis A
PI 541522	CPYR_2130.001	Pyrus communis	Charles Ernest	-0.0215822	-0.0203461	0.00530796	-0.00403878	Communis	Occidental	Admixed_Communis	P. communis J
PI 541523	CPYR_2131.001	Pyrus communis	Bergamotte de Baillargues	-0.0170681	0.00622287	-0.00346129	-0.000880774	Communis	Occidental	Admixed	P. communis A
PI 541533	CPYR_2141.002	Pyrus communis	Anderson (Andy)	-0.023943	-0.0322344	0.0112654	-0.0112818	Communis	Occidental	Admixed_Communis	P. communis A
PI 541461	CPYR_2143.001	Pyrus communis	F.12-173 (P-2366)	-0.0179565	0.00367157	-0.00475275	0.0159271	Communis	Occidental	Admixed	P. communis E	Pyrus communis hybrid
PI 541462	CPYR_2144.001	Pyrus communis	G.28.120 (P-2363)	0.0492613	-0.0249007	-0.0340382	0.00608087	Group3	Oriental	P. calleryana & koehnei	-	Pyrus calleryana
PI 541931	CPYR_2149.002	Pyrus pyrifolia	Hosui	0.0472583	0.0172058	0.0729783	0.00438936	Group4	Oriental	P. pyrifolia & ×sinkiangensis	-
PI 541709	CPYR_216.002	Pyrus hybrid	Estella	-0.00466712	-0.019616	0.0191654	-0.0113536	between European and Asian	Occidental	Admixed	P. communis F
PI 541710	CPYR_217.004	Pyrus hybrid	Eureka	-0.0160536	-0.0306481	0.0168432	-0.0141545	between European and Asian- but close to Communis	Occidental	Admixed_Communis	P. communis I	Pyrus communis
PI 541104	CPYR_2185.001	Pyrus calleryana	Redspire (P. calleryana)	0.0490164	-0.0217451	-0.0256732	0.00618787	Group3	Oriental	P. calleryana & koehnei	-
PI 541105	CPYR_2186.001	Pyrus calleryana	Chanticleer (P. calleryana)	0.0490472	-0.0212766	-0.0241827	0.00675431	Group3	Oriental	P. calleryana & koehnei	-
PI 541107	CPYR_2188.001	Pyrus calleryana	Grant St. Yellow (P. calleryana)	0.0492503	-0.0258798	-0.036134	0.00606724	Group3	Oriental	P. calleryana & koehnei	-
PI 541108	CPYR_2189.001	Pyrus calleryana	Aristocrat (P. calleryana)	0.0493443	-0.0262386	-0.0359218	0.00674989	Group3	Oriental	P. calleryana & koehnei	-
PI 541109	CPYR_2190.001	Pyrus calleryana	Avery Park (P. calleryana) - upright	0.0481089	-0.0250053	-0.0347255	0.00635675	Group3	Oriental	P. calleryana & koehnei	-
PI 541536	CPYR_2199.001	Pyrus communis	Doyenne du Comice - Crimson Gem #2	-0.0237017	-0.0342054	0.011551	-0.020199	Communis	Occidental	Admixed_Communis	P. communis J
PI 617528	CPYR_2205.001	Pyrus hybrid	Nijisseiki x D'Anjou	0.0105688	-0.0156038	0.0422822	-0.00989877	between European and Asian	Admixed	Admixed	-
PI 541537	CPYR_2206.002	Pyrus communis	Orcas	-0.0231842	-0.0303451	0.0099653	-0.0184326	Communis	Occidental	Admixed_Communis	P. communis J
PI 541538	CPYR_2207.001	Pyrus communis	Rescue	-0.023766	-0.0327327	0.0115031	-0.014458	Communis	Occidental	Admixed_Communis	P. communis J
PI 541188	CPYR_221.001	Pyrus communis	Farmingdale	-0.0231575	-0.0254843	0.00740951	-0.00727565	Communis	Occidental	Admixed_Communis	P. communis J
PI 255611	CPYR_222.003	Pyrus communis	Favorite Morel	-0.0198671	-0.0135427	0.00411599	-0.00548041	Communis	Occidental	Admixed_Communis	P. communis D
PI 541309	CPYR_224.001	Pyrus communis	Fertility (not 4x)	-0.0211127	-0.0158892	0.00384682	-0.00843629	Communis	Occidental	Admixed_Communis	P. communis D
PI 541539	CPYR_2253.006	Pyrus communis	Figue d'Alencon	-0.0206385	-0.020681	0.0063415	-0.0141306	Communis	Occidental	Admixed_Communis	P. communis J
PI 541965	CPYR_2254.002	Pyrus ussuriensis	Nan Guo Li [Nangon Li]	0.042194	0.0163174	0.0508197	0.00158005	Group4	Oriental	Admixed	-	Pyrus pyrifolia/ussuriensis hybrid
PI 541540	CPYR_2266.003	Pyrus communis	Laxton's Record	-0.0213734	-0.0186527	0.00503803	-0.0120633	Communis	Occidental	Admixed_Communis	P. communis J
PI 541541	CPYR_2267.003	Pyrus communis	Laxton's Early Market	-0.0223305	-0.0195012	0.00537536	-0.00195446	Communis	Occidental	Admixed_Communis	P. communis F
PI 541542	CPYR_2268.002	Pyrus communis	Laxton's Foremost	-0.0217461	-0.0236545	0.00746805	-0.0184722	Communis	Occidental	Admixed_Communis	P. communis D
PI 541543	CPYR_2269.001	Pyrus communis	Laxton's Superb	-0.0234372	-0.0324379	0.0106363	-0.0160226	Communis	Occidental	Admixed_Communis	P. communis A
PI 541545	CPYR_2271.001	Pyrus communis	Princess	-0.0211918	-0.0144089	0.00330344	-0.010126	Communis	Occidental	Admixed_Communis	P. communis J
PI 541546	CPYR_2272.001	Pyrus communis	Ottawa 291 [O-291]	-0.0225528	-0.0299246	0.00969863	-0.0123109	Communis	Occidental	Admixed_Communis	P. communis J
PI 541547	CPYR_2273.001	Pyrus communis	Golden Spice	-0.00189956	-0.00087921	0.0200055	-0.00628471	between European and Asian	Admixed	North US-Canada	-	Pyrus hybrid
PI 541967	CPYR_2275.001	Pyrus communis	Romania 138-31-38	-0.0219823	-0.0200415	0.00622524	-0.0164121	Communis	Occidental	Admixed_Communis	P. communis F
PI 541968	CPYR_2276.001	Pyrus communis	Romania 138-5-22	-0.0221348	-0.0191171	0.00469756	-0.0122717	Communis	Occidental	Admixed_Communis	P. communis J
PI 541969	CPYR_2277.001	Pyrus communis	Romania 17-4/5-32	-0.0227559	-0.029705	0.0101057	-0.0178843	Communis	Occidental	Admixed_Communis	P. communis J
PI 541549	CPYR_2278.002	Pyrus communis	Pioneer No. 3	0.00542076	0.00133979	0.0288666	-0.0102659	between European and Asian	Admixed	North US-Canada	-	Pyrus hybrid
PI 541550	CPYR_2279.001	Pyrus communis	Remy Chatenay	-0.0207039	-0.0164845	0.00419203	-0.0149451	Communis	Occidental	Communis D	P. communis B
PI 263680	CPYR_228.001	Pyrus communis	Belle Lucrative (=Fondante D'Automne)	-0.0223802	-0.0261774	0.00839365	-0.0164798	Communis	Occidental	Admixed_Communis	P. communis F
PI 541551	CPYR_2280.001	Pyrus communis	Poirier Fleurissant Tard	-0.0167193	0.0127353	-0.00768671	0.0196873	Communis	Occidental	Admixed	P. communis E	Pyrus communis hybrid
PI 541552	CPYR_2281.001	Pyrus communis	Doyenne Perault	-0.0221662	-0.0239531	0.00769216	-0.0204878	Communis	Occidental	Admixed_Communis	P. communis J
PI 541553	CPYR_2282.001	Pyrus communis	Jeanne d'Arc	-0.0201463	-0.0180975	0.00584665	-0.0168068	Communis	Occidental	Communis D	P. communis F
PI 541554	CPYR_2283.001	Pyrus communis	Frangipane	-0.0196777	-0.0049076	-0.000657159	-0.00240388	Communis	Occidental	Communis E	P. communis E
PI 541555	CPYR_2284.001	Pyrus communis	Fiorenza	-0.0241605	-0.0357887	0.0122713	-0.0178465	Communis	Occidental	Communis A	P. communis J
PI 541556	CPYR_2285.001	Pyrus hybrid	Ure	-0.0028871	-0.0162144	0.0277978	-0.0144865	between European and Asian	Admixed	North US-Canada	-
PI 541557	CPYR_2286.001	Pyrus communis	Coscia (Tardive?)	-0.0208228	-0.0174935	0.00590759	-0.00069837	Communis	Occidental	Admixed_Communis	P. communis A
PI 541970	CPYR_2288.001	Pyrus communis	B-22	-7.00442e-05	-0.00490176	0.0162743	-0.00906981	between European and Asian	Admixed	South-East US	-	Pyrus hybrid
PI 541971	CPYR_2289.001	Pyrus hybrid	BP-3 (B-14)	0.00271221	0.00356277	0.0136159	-0.00740993	between European and Asian	Admixed	South-East US	-
PI 541972	CPYR_2290.001	Pyrus hybrid	B-27	0.00107139	-0.00135308	0.0176155	-0.00578654	between European and Asian	Admixed	South-East US	-
PI 541007	CPYR_2291.003	Pyrus betulifolia	P. betulifolia - Shaanxi, China	0.0492909	-0.0355915	-0.0769067	-0.00803046	Group3	Oriental	P. betulaefolia	-
PI 541007	CPYR_2291.006	Pyrus betulifolia	P. betulifolia - Shaanxi, China	0.0514849	-0.040699	-0.0824055	-0.00870932	Group3	Oriental	P. betulaefolia	-
PI 541559	CPYR_2292.001	Pyrus communis	Bestever	-0.0206589	-0.0191404	0.00630128	-0.0130601	Communis	Occidental	Admixed_Communis	P. communis B
PI 541477	CPYR_2295.001	Pyrus communis	Hudar	-0.0217565	-0.0168389	0.00446438	-0.00516353	Communis	Occidental	Admixed_Communis	P. communis F
PI 541480	CPYR_2296.001	Pyrus communis	Manning-Miller	-0.0230489	-0.0306624	0.0108504	-0.0124046	Communis	Occidental	Admixed_Communis	P. communis I
PI 617529	CPYR_2297.001	Pyrus communis	Stacey	-0.0190502	0.00463008	-0.00458643	0.0228687	Communis	Occidental	Admixed	P. communis E	Pyrus communis hybrid
PI 617530	CPYR_2298.001	Pyrus communis	Waterville	-0.0212239	-0.0145128	0.00376038	-0.00108504	Communis	Occidental	Admixed_Communis	P. communis F	Pyrus communis hybrid
PI 264694	CPYR_23.002	Pyrus communis	Arganche	-0.0177282	0.00877116	-0.0061233	0.0150912	Communis	Occidental	P. communis pyraster	P. communis pyraster	Pyrus communis subsp. pyraster
PI 231889	CPYR_230.001	Pyrus communis	Fondante de Charneu	-0.0206027	-0.0120773	0.00301995	-0.0039898	Communis	Occidental	Admixed_Communis	P. communis F
PI 541190	CPYR_231.002_2	Pyrus communis	Fondante de Moulins Lille	-0.0211167	-0.0149161	0.00346015	-0.009672	Communis	Occidental	Admixed_Communis	P. communis F
PI 541191	CPYR_233.001	Pyrus communis	Forelle	-0.01822	0.00658116	-0.00474954	-0.00365759	Communis	Occidental	Admixed	P. communis E	Pyrus communis hybrid
PI 617534	CPYR_2331.001	Pyrus communis	Fame	-0.0223621	-0.0221029	0.00683991	-0.0100142	Communis	Occidental	Admixed_Communis	P. communis F
PI 541506	CPYR_2332.001	Pyrus communis	Tyson	-0.0228971	-0.0234711	0.00706956	-0.00235837	Communis	Occidental	Admixed_Communis	P. communis A
PI 617535	CPYR_2334.001	Pyrus communis subsp. pyraster	French Resistant - rootstock clone	-0.0173536	0.00770866	-0.00599333	0.00930812	Communis	Occidental	Admixed	P. communis E	Pyrus communis hybrid
PI 617537	CPYR_2338.001	Pyrus ussuriensis	Chien Li	0.0412092	0.0197308	0.0518002	0.000551628	Group4	Oriental	Admixed	-	Pyrus pyrifolia/ussuriensis hybrid
PI 617538	CPYR_2339.002	Pyrus communis	Poite Berringer	-0.0217266	-0.0220273	0.00674308	-0.00450593	Communis	Occidental	Admixed_Communis	P. communis J
PI 324127	CPYR_235.002	Pyrus communis	Fragrante	-0.0219608	-0.0234789	0.00769405	-0.0150413	Communis	Occidental	Admixed_Communis	P. communis D
PI 641274	CPYR_2350.002	Pyrus salicifolia	P. salicifolia (hybrid) - Maikop, Russia	-0.0165376	0.0153522	-0.00891917	0.0437662	Communis	Occidental	Admixed	P. salicifolia & sachokiana	Pyrus hybrid
PI 617544	CPYR_2352.001	Pyrus communis	Doina	-0.0209276	-0.0101638	0.00234703	-0.00636267	Communis	Occidental	Admixed_Communis	P. communis F
PI 617545	CPYR_2354.001	Pyrus communis	Aromata di Bistrita	-0.022301	-0.019128	0.00570254	-0.00208082	Communis	Occidental	Admixed_Communis	P. communis E	Pyrus communis hybrid
PI 691242	CPYR_2880.001	Pyrus pyrifolia	Utrennaya Svezheste	0.0295738	0.00842115	0.0511162	0.00596407	Group4	Oriental	P. pyrifolia & ×sinkiangensis	-	uncertain
PI 617546	CPYR_2357.001	Pyrus communis	Republica	-0.0221015	-0.0223759	0.00661725	-0.0203392	Communis	Occidental	Admixed_Communis	P. communis D
PI 312498	CPYR_2358.001	Pyrus communis	Grumkower Butter Birne	-0.0178093	0.00510694	-0.00443424	0.0149653	Communis	Occidental	Admixed	P. communis F	Pyrus communis hybrid
PI 541192	CPYR_236.002	Pyrus communis	Frederick Clapp	-0.0209807	-0.0184055	0.00510848	-0.00878727	Communis	Occidental	Admixed_Communis	P. communis G
PI 617548	CPYR_2362.001	Pyrus hybrid	Spalding	0.00979827	-0.0124588	0.0278007	-0.00684305	between European and Asian	Admixed	South-East US	-
PI 617551	CPYR_2365.002	Pyrus communis	Hall 20	-0.0206053	-0.0126685	0.00297805	-3.79239e-05	Communis	Occidental	Admixed_Communis	P. communis F
PI 132103	CPYR_531.001	Pyrus pyrifolia	Shu Li	0.0370293	0.0164978	0.0391869	-0.000104346	Group4	Oriental	Admixed	-	Pyrus pyrifolia/ussuriensis hybrid
PI 617552	CPYR_2369.001	Pyrus communis	Cedar Lane Farm 1	-0.0214239	-0.0165784	0.00443002	-0.00675022	Communis	Occidental	Admixed_Communis	P. communis J
PI 617553	CPYR_2370.001	Pyrus communis	Cedar Lane Farm 3	-0.0182781	0.00429925	-0.00404894	0.00663464	Communis	Occidental	Communis E	P. communis E
PI 617554	CPYR_2371.001	Pyrus communis	Bantam	-0.00848692	-0.00840894	0.017635	-0.00906353	between European and Asian (closer to EU)	Occidental	Admixed	P. communis J
PI 617556	CPYR_2373.001	Pyrus communis	Gaspard (=Summercrisp)	-0.0203394	-0.00630654	0.000822063	0.00306204	Communis	Occidental	Admixed_Communis	P. communis A	Pyrus communis hybrid
PI 637985	CPYR_2375.003	Pyrus communis	Autumn Red	-0.0219465	-0.0192347	0.00570926	-0.0149291	Communis	Occidental	Admixed_Communis	P. communis F
PI 688153	CPYR_2378.001	Pyrus communis	Red Silk	-0.0236951	-0.0355026	0.0121814	-0.0169323	Communis	Occidental	Admixed_Communis	P. communis G
PI 280033	CPYR_238.003	Pyrus communis	Gansel's Bergamot	-0.0193285	-0.00428737	-0.000582818	-0.00901299	Communis	Occidental	Admixed_Communis	P. communis E
PI 688139	CPYR_2380.001	Pyrus communis	Rubiyat	-0.0184706	0.0059218	-0.0052025	0.0160061	Communis	Occidental	Admixed	P. communis pyraster	Pyrus communis hybrid
PI 312503	CPYR_2386.001	Pyrus hybrid	Michurin Beurré Zimnaya (Winter)	-0.0188155	0.00314906	-0.00380929	0.00858427	Communis	Occidental	Admixed	P. communis E
PI 541711	CPYR_239.002	Pyrus hybrid	Garber	0.0114667	2.99405e-05	0.0219426	0.00228302	between European and Asian	Admixed	South-East US	-
PI 617563	CPYR_2392.001	Pyrus communis	Earlibrite	-0.023585	-0.0300962	0.0104432	-0.0114316	Communis	Occidental	Admixed_Communis	P. communis A
PI 617564	CPYR_2393.001	Pyrus communis	Dave's Delight	-0.025174	-0.0410942	0.014247	-0.015318	Communis	Occidental	Communis A	P. communis F
PI 541194	CPYR_240.002	Pyrus communis	General Galliene	-0.0192401	-0.021961	0.00828707	-0.00893697	Communis	Occidental	Admixed_Communis	P. communis F
PI 260157	CPYR_241.003	Pyrus communis	General Le Clerc	-0.0227403	-0.0256632	0.00781281	-0.0100858	Communis	Occidental	Admixed_Communis	P. communis F
PI 617566	CPYR_2425.001	Pyrus koehnei	P. koehnei - Disneyland	0.0462311	-0.0200131	-0.0307382	0.00319599	Group3	Oriental	P. calleryana & koehnei	-
PI 617568	CPYR_2427.005	Pyrus salicifolia	P. salicifolia - Russia	-0.00776251	0.0636349	-0.0267878	0.0158382	Group2	Occidental	Admixed_Group1	P. salicifolia & sachokiana	Pyrus hybrid
PI 637987	CPYR_2433.017	Pyrus xerophila	P. xerophila? (P. bretschneideri like)	0.0472815	0.00673887	0.0436885	0.00441054	Group4	Oriental	P. pyrifolia & ×sinkiangensis	-	Pyrus pyrifolia
PI 637987	CPYR_2433.018	Pyrus xerophila	P. xerophila? (P. pashia like foliage)	0.0481275	-0.00306692	0.0212801	0.00527484	between Group3 and 4	Oriental	Admixed	-	Pyrus hybrid
PI 637987	CPYR_2433.02	Pyrus xerophila	P. xerophila? (P. pyrifolia or pashia or calleryana hybrid?)	0.0415217	-0.00585713	-0.00336319	0.00673904	between Group3 and 4	Oriental	Admixed	-	Pyrus hybrid
PI 637987	CPYR_2433.021	Pyrus xerophila	P. xerophila?	0.0480197	-0.00225124	0.0216539	0.00493876	between Group3 and 4	Oriental	Admixed	-	Pyrus hybrid
PI 541524	CPYR_2437.001	Pyrus communis	Delbard Premiere	-0.0215706	-0.0156048	0.00432411	0.00734619	Communis	Occidental	Admixed_Communis	P. communis pyraster	Pyrus communis hybrid
PI 654914	CPYR_2438.001	Pyrus communis	Romania 14/125 F2-3-131	-0.00675253	-0.012338	0.0174669	-0.0126456	between European and Asian	Occidental	Admixed	P. communis A
PI 654915	CPYR_2439.001	Pyrus communis	Romania 4/115 F2-8-194	-0.00307076	-0.00674869	0.0205722	-0.0117231	between European and Asian	Admixed	Admixed	-	Pyrus hybrid
PI 264194	CPYR_244.004	Pyrus communis	Gieser Wildeman	-0.0198006	-0.00436015	-0.00077153	-0.00122725	Communis	Occidental	Communis E	P. communis E
PI 665776	CPYR_2440.002	Pyrus communis	Napoca	-0.0217993	-0.0178999	0.00502952	-0.00424831	Communis	Occidental	Admixed_Communis	P. communis F
PI 654916	CPYR_2441.001	Pyrus hybrid	Romania 3/35 FE-12-139	-0.0031927	-0.00687398	0.0209327	-0.00629051	between European and Asian	Admixed	Admixed	-
PI 665782	CPYR_2442.001	Pyrus communis	Pyvert [Vert] (Genetic Dwarf)	-0.0206098	-0.0191537	0.00684979	-0.0168553	Communis	Occidental	Admixed_Communis	P. communis D
PI 654917	CPYR_2445.001	Pyrus ussuriensis	Chinfon Li	0.044471	0.0134101	0.0512195	0.00328358	Group4	Oriental	P. pyrifolia & ×sinkiangensis	-	Pyrus pyrifolia
PI 665785	CPYR_2448.001	Pyrus pashia	P. pashia - Nepal	0.044091	-0.00124873	0.0114006	0.00168637	between Group3 and 4	Oriental	Admixed	-	Pyrus hybrid
PI 654920	CPYR_2449.001	Pyrus communis	Colmar d'Ete	-0.0188541	-0.000269247	-0.00249599	0.00659051	Communis	Occidental	Admixed	P. communis E
PI 654921	CPYR_2450.001	Pyrus communis	Magnate	-0.0206804	-0.0118455	0.00212106	-0.00286374	Communis	Occidental	Admixed_Communis	P. communis F
PI 617571	CPYR_2454.001	Pyrus communis	Enie	-0.0195206	-0.00934552	0.00172946	0.00428246	Communis	Occidental	Admixed_Communis	P. communis A	Pyrus communis hybrid
PI 617572	CPYR_2455.001	Pyrus communis	Miney	-0.0209926	-0.0135433	0.00336346	-0.000121375	Communis	Occidental	Admixed_Communis	P. communis E	Pyrus communis hybrid
PI 617573	CPYR_2456.001	Pyrus communis	Carrick	-0.00530826	-0.011911	0.0161978	-0.00471955	between European and Asian	Occidental	Admixed	P. communis D
PI 541195	CPYR_246.001	Pyrus communis	Gin	-0.017538	0.00966125	-0.00626306	0.00676471	Communis	Occidental	Admixed	P. communis E	Pyrus communis hybrid
PI 541310	CPYR_249.001	Pyrus communis	Glou Morceau	-0.01871	-0.00744301	0.0017713	-0.0108963	Communis	Occidental	Communis D	P. communis F
PI 541119	CPYR_25.001	Pyrus communis	Aurora	-0.0248563	-0.0388423	0.0135186	-0.017703	Communis	Occidental	Admixed_Communis	P. communis J
PI 541712	CPYR_250.003	Pyrus hybrid	Good Christian	-0.0239461	-0.0355375	0.0122716	-0.017659	Communis	Occidental	Admixed_Communis	P. communis A	Pyrus communis
PI 617579	CPYR_2500.001	Pyrus communis	Mission La Purisima Pear 1-A	-0.0197877	-0.00195344	-0.00203536	0.0052749	Communis	Occidental	Admixed	P. communis E
PI 617580	CPYR_2501.001	Pyrus communis	Mission La Purisima Pear 2-A	-0.0199187	-0.000467768	-0.00240038	0.00243143	Communis	Occidental	Admixed	P. communis E	Pyrus communis hybrid
PI 617584	CPYR_2505.001	Pyrus communis	Joey's Red Flesh Pear (=Blutbirne?)	-0.0214713	-0.0128785	0.00245486	0.00296333	Communis	Occidental	Admixed_Communis	P. communis A
PI 617585	CPYR_2506.002	Pyrus communis	Premices de Maria Lesueur	-0.0196978	-0.0185863	0.00513339	-0.00756924	Communis	Occidental	Admixed_Communis	P. communis F
PI 617587	CPYR_2510.002	Pyrus communis	Blanquilla (=Spadona)	-0.0163722	0.0102153	-0.00508751	0.0118266	Communis	Occidental	Admixed	P. communis H	Pyrus communis hybrid
PI 617589	CPYR_2513.004	Pyrus regelii	P. regelii KAZ 93-41-09 - Kazakhstan	0.00649498	0.0427823	-0.0121605	-0.0123438	between European and Asian	Admixed	P. regelii	-
PI 617593	CPYR_2517.001	Pyrus communis	Rombough Mite Resistant Pear #1	-0.0233597	-0.029034	0.00943611	-0.00926641	Communis	Occidental	Admixed_Communis	P. communis J
PI 617594	CPYR_2518.001	Pyrus communis	Potomac	-0.0230537	-0.026039	0.00771632	-0.00758747	Communis	Occidental	Admixed_Communis	P. communis J
PI 617595	CPYR_2519.001	Pyrus communis	US 309	-0.0220553	-0.0215577	0.00627096	-0.0148976	Communis	Occidental	Admixed_Communis	P. communis A
PI 541196	CPYR_252.001	Pyrus communis	Gorham	-0.0240849	-0.0371258	0.0128514	-0.0209867	Communis	Occidental	Admixed_Communis	P. communis J
PI 617596	CPYR_2520.001	Pyrus korshinskyi	P. korshinskyi 94009 - Kyrgyzstan	-0.0153999	0.026933	-0.0145396	0.098812	Communis	Occidental	P. communis caucasica	P. communis caucasica A	Pyrus communis subsp. caucasica
PI 617597	CPYR_2521.001	Pyrus korshinskyi	P. korshinskyi 94010 - Kyrgyzstan	-0.0177861	0.0114899	-0.00755021	0.045314	Communis	Occidental	Admixed	P. communis hybrid	Pyrus hybrid
PI 617598	CPYR_2522.002	Pyrus korshinskyi	P. korshinskyi 94011 - Kyrgyzstan	-0.0198707	-0.00119134	-0.00209485	0.0433389	Communis	Occidental	Admixed	P. communis pyraster	Pyrus hybrid
PI 617598	CPYR_2522.003	Pyrus korshinskyi	P. korshinskyi 94011 - Kyrgyzstan	-0.0194415	-0.00137348	-0.00223718	0.0375558	Communis	Occidental	Admixed	P. communis pyraster	Pyrus hybrid
PI 617598	CPYR_2522.004	Pyrus korshinskyi	P. korshinskyi 94011 - Kyrgyzstan	-0.0199863	-0.00259123	-0.00208978	0.039736	Communis	Occidental	Admixed	P. communis A	Pyrus hybrid
PI 617598	CPYR_2522.005	Pyrus korshinskyi	P. korshinskyi 94011 - Kyrgyzstan	-0.0154586	0.0262064	-0.0147699	0.0968228	Communis	Occidental	P. communis caucasica	P. salicifolia & sachokiana	Pyrus communis subsp. caucasica
PI 617598	CPYR_2522.009	Pyrus korshinskyi	P. korshinskyi 94011 - Kyrgyzstan	-0.015824	0.0255882	-0.0147723	0.0954365	Communis	Occidental	P. communis caucasica	P. salicifolia & sachokiana	Pyrus communis subsp. caucasica
PI 617601	CPYR_2525.001	Pyrus hybrid	Tennessee	-0.00221065	-0.0072151	0.0145568	-0.0031898	between European and Asian	Admixed	South-East US	-
PI 617602	CPYR_2526.001	Pyrus hybrid	Biscamp	0.0147095	-0.0099723	0.0279715	-0.0111234	between European and Asian	Admixed	South-East US	-
PI 617607	CPYR_2532.001	Pyrus communis	Illinois 80E-1 (Illinois selection from Russian seed)	-0.0237657	-0.0311465	0.0104346	-0.0147902	Communis	Occidental	Admixed_Communis	P. communis J
PI 665740	CPYR_2533.001	Pyrus communis	Concorde	-0.0206185	-0.0131447	0.00283429	-0.0150421	Communis	Occidental	Admixed_Communis	P. communis F
PI 617608	CPYR_2534.001	Pyrus communis	IV 12	-0.0209747	-0.0149406	0.00504731	0.00591311	Communis	Occidental	Admixed_Communis	P. communis E	Pyrus communis hybrid
PI 617609	CPYR_2535.001	Pyrus hybrid	Lida	0.00413402	-0.00434985	0.0302309	-0.0116005	between European and Asian	Admixed	North US-Canada	-
PI 617610	CPYR_2536.001	Pyrus communis	Orlovskaja Zolotistaja	-0.0203602	-0.00588269	0.000676915	0.00735116	Communis	Occidental	Admixed_Communis	P. communis A	Pyrus communis hybrid
PI 617612	CPYR_2538.001	Pyrus communis	Oranzhevaja	-0.0212709	-0.0183336	0.00672445	0.00291126	Communis	Occidental	Admixed_Communis	P. communis A
PI 324128	CPYR_254.002	Pyrus communis	Grata	-0.024292	-0.0368926	0.0122818	-0.0186796	Communis	Occidental	Admixed_Communis	P. communis D
PI 617616	CPYR_2542.001	Pyrus communis	Moknine No. 4 - Tunisia	-0.0198147	0.00243052	-0.0041313	0.0177372	Communis	Occidental	P. communis pyraster	P. communis pyraster	Pyrus communis subsp. pyraster
PI 617617	CPYR_2543.001	Pyrus communis	Arbi	-0.0145218	0.0224013	-0.0109461	-0.00644053	Communis/Group1	Occidental	Admixed	P. communis E	Pyrus hybrid
PI 637988	CPYR_2545.001	Pyrus ussuriensis	Liu Yue Xian [Liu Yue Shian]	0.0309427	0.0156733	0.0406061	0.00235622	Group4	Oriental	P. pyrifolia & ×sinkiangensis	-	Pyrus ×sinkiangensis
PI 617620	CPYR_2548.001	Pyrus communis	Junsko Zlato	-0.0236388	-0.0287047	0.00970833	-0.00411613	Communis	Occidental	Admixed_Communis	P. communis B
PI 541713	CPYR_255.001	Pyrus hybrid	Greisa No.1 (=Douglas?)	-0.00465918	-0.021513	0.0212087	-0.0101576	between European and Asian- but close to Communis	Occidental	Admixed_Communis	P. communis D	Pyrus communis
PI 617623	CPYR_2551.004	Pyrus hybrid	P. hybrid KAZ 95-05-04 - Kazakhstan	-0.0180024	0.0101562	-0.00707155	0.0462389	Communis	Occidental	Admixed	P. communis hybrid
PI 617623	CPYR_2551.006	Pyrus hybrid	P. communis hybrid KAZ 95-05-04 - Kazakhstan	-0.0185301	0.00608601	-0.0058798	0.0452298	Communis	Occidental	Admixed	P. communis hybrid
PI 617624	CPYR_2552.002	Pyrus hybrid	P. hybrid KAZ 95-10-08L - Kazakhstan	-0.0163321	0.0223832	-0.0132279	0.0724136	Communis	Occidental	Admixed	P. communis hybrid
PI 617625	CPYR_2553.001	Pyrus hybrid	P. hybrid KAZ 95-10-11F - Kazakhstan	-0.0171686	0.0155342	-0.00992459	0.0577938	Communis	Occidental	Admixed	P. communis hybrid
PI 617629	CPYR_2558.001	Pyrus hybrid	John	0.00330772	-0.0101072	0.0330265	-0.0120467	between European and Asian	Admixed	North US-Canada	-
PI 617631	CPYR_2561.001	Pyrus hybrid	Peter	0.00323781	-0.0114473	0.0324461	-0.0165922	between European and Asian	Admixed	North US-Canada	-
PI 617632	CPYR_2562.001	Pyrus hybrid	Petrovski	0.00700948	0.015429	0.0222113	0.00600574	between European and Asian	Admixed	North US-Canada	-
PI 617633	CPYR_2563.001	Pyrus hybrid	Simon	0.00264309	-0.014147	0.0333194	-0.0109185	between European and Asian	Admixed	North US-Canada	-
PI 617634	CPYR_2564.001	Pyrus communis	Tait Dropmore	-0.0241394	-0.0352288	0.0120648	-0.0135537	Communis	Occidental	Admixed_Communis	P. communis G
PI 617635	CPYR_2565.001	Pyrus hybrid	Thomas	0.00351987	-0.0090446	0.0323238	-0.0130643	between European and Asian	Admixed	North US-Canada	-
PI 617637	CPYR_2567.002	Pyrus communis	Souvenir du Congress	-0.0235355	-0.0319312	0.0104731	-0.0156235	Communis	Occidental	Admixed_Communis	P. communis F
PI 617638	CPYR_2569.002	Pyrus communis	La France	-0.0202712	-0.0134924	0.00321081	-0.00311418	Communis	Occidental	Admixed_Communis	P. communis F
PI 617640	CPYR_2571.001	Pyrus communis	Soldat Laboureur	-0.0203241	-0.00976279	0.00132926	-0.0108425	Communis	Occidental	Admixed_Communis	P. communis F
PI 617641	CPYR_2572.001	Pyrus communis	Brignoles	-0.0177559	0.00715142	-0.00538446	0.0013269	Communis	Occidental	Communis E	P. communis E
PI 617642	CPYR_2573.001	Pyrus hybrid	Turnbull (Turnbull Giant)	0.00921472	-0.0125136	0.0265954	-0.00710986	between European and Asian	Admixed	South-East US	-
PI 617643	CPYR_2574.001	Pyrus hybrid	Tarusa Crimson (=Tamared)	0.0103675	-0.0126263	0.0420215	-0.0102602	between European and Asian	Admixed	Admixed	-
PI 617644	CPYR_2575.001	Pyrus communis	Poire d'Anis	-0.0221428	-0.0201054	0.00580677	-0.00627336	Communis	Occidental	Admixed_Communis	P. communis J
PI 617646	CPYR_2577.001	Pyrus calleryana	Bradford (P. calleryana)	0.0491392	-0.0265476	-0.0368336	0.00683528	Group3	Oriental	P. calleryana & koehnei	-
PI 641276	CPYR_2582.001	Pyrus sp.	Dardhe-e-kuge o.p. - Albania market	-0.0172348	0.012923	-0.0086363	0.0403853	Communis	Occidental	Admixed	P. communis hybrid	Pyrus communis hybrid
PI 641276	CPYR_2582.004	Pyrus sp.	Dardhe-e-kuge o.p. - Albania market	-0.0170719	0.0135703	-0.00899872	0.0384699	Communis	Occidental	Admixed	P. communis hybrid	Pyrus communis hybrid
PI 641279	CPYR_2587.001	Pyrus regelii	P. regelii - Boraldy River Forest, Kazakhstan	0.00486847	0.0403891	-0.0115547	-0.0105405	between European and Asian	Admixed	P. regelii	-
PI 641279	CPYR_2587.002	Pyrus regelii	P. regelii - Boraldy River Forest, Kazakhstan	0.00462186	0.0394606	-0.0121643	-0.0100551	between European and Asian	Admixed	P. regelii	-
PI 541988	CPYR_259.003	Pyrus ussuriensis	Guar Li Sdlg No. 2	0.0433707	0.00945586	0.0325876	0.000222693	Group4	Oriental	Admixed	-	Pyrus pyrifolia/ussuriensis hybrid
PI 617652	CPYR_2593.001	Pyrus communis	Untoasa de Geoagiu	-0.0240468	-0.0358367	0.0123076	-0.0191985	Communis	Occidental	Admixed_Communis	P. communis F
PI 637990	CPYR_2595.002	Pyrus communis	Endicott Pear	-0.017912	0.0012627	-0.00323539	0.00217612	Communis	Occidental	Communis E	P. communis E
PI 641280	CPYR_2597.001	Pyrus sp.	Ledbetter Pear	0.0320303	0.00147327	0.043648	-0.00294012	between European and Asian, but closer to Group4	Oriental	Admixed	-	uncertain
PI 617654	CPYR_2598.002	Pyrus communis	Pyrodwarf - rootstock clone (IPR expires 2017)	-0.0220299	-0.0208195	0.00620018	-0.0139854	Communis	Occidental	Admixed_Communis	P. communis F
PI 541120	CPYR_26.001	Pyrus communis	Ayer	-0.0248499	-0.0413372	0.0150594	-0.0192365	Communis	Occidental	Admixed_Communis	P. communis J
PI 617657	CPYR_2602.001	Pyrus hybrid	Higdon	0.0229479	-0.000582727	0.0303663	-0.00716729	between European and Asian	Admixed	South-East US	-
PI 617661	CPYR_2606.001	Pyrus hybrid	Thanksgiving	0.0282174	-0.00503215	0.0382529	-0.00654579	between European and Asian (closer to As)	Admixed	South-East US	-
PI 617663	CPYR_2608.001	Pyrus pyrifolia	Shin Li	0.0464808	0.0149944	0.0642078	0.00381921	Group4	Oriental	P. pyrifolia & ×sinkiangensis	-
PI 617664	CPYR_2609.001	Pyrus pyrifolia	Henderson	0.0448059	0.0106353	0.0519033	0.00269608	Group4	Oriental	P. pyrifolia & ×sinkiangensis	-
PI 541200	CPYR_261.001	Pyrus communis	H 6831/1.12 (=HW 605?)	-0.0232884	-0.0279871	0.00924184	-0.0138167	Communis	Occidental	Admixed_Communis	P. communis F
PI 617666	CPYR_2611.001	Pyrus hybrid	Florida 58-45	0.00815365	-0.00870242	0.023244	-0.00635229	between European and Asian	Admixed	South-East US	-
PI 617562	CPYR_2385.001	Pyrus communis	Harrow Sweet (HW 609) - IPR expires 2015	-0.0234811	-0.0311255	0.0104431	-0.0174591	Communis	Occidental	Admixed_Communis	P. communis F
PI 617673	CPYR_2618.001	Pyrus pyrifolia	Bou Tsu Li	0.0461588	0.00841251	0.0435255	0.00304376	Group4	Oriental	P. pyrifolia & ×sinkiangensis	-
PI 617674	CPYR_2619.001	Pyrus hybrid	Ooharabeni	0.0101127	-0.01381	0.043366	-0.00641487	between European and Asian	Admixed	Admixed	-
PI 617675	CPYR_2620.001	Pyrus communis	Beurré Six	-0.0237854	-0.0326386	0.010995	-0.0196276	Communis	Occidental	Admixed_Communis	P. communis J
PI 617676	CPYR_2621.001	Pyrus communis	Osenniaja Jakovleva	-0.0204415	-0.00653817	0.000797927	0.00410426	Communis	Occidental	Admixed_Communis	P. communis H	Pyrus communis hybrid
PI 617677	CPYR_2622.001	Pyrus communis	Yungen	-0.0243458	-0.0383553	0.0137846	-0.025285	Communis	Occidental	Admixed_Communis	P. communis I
PI 617678	CPYR_2623.001	Pyrus pyrifolia	Dan Bae (Olympic)	0.0473827	0.0132444	0.0612015	0.00405985	Group4	Oriental	P. pyrifolia & ×sinkiangensis	-
PI 657915	CPYR_2624.001	Pyrus communis	Elliot	-0.0209194	-0.0179018	0.00609131	-0.013194	Communis	Occidental	Admixed_Communis	P. communis J
PI 657916	CPYR_2625.001	Pyrus pyrifolia	Daisui Li	0.043726	0.0143634	0.0568794	0.00372188	Group4	Oriental	P. pyrifolia & ×sinkiangensis	-
PI 693207	CPYR_2627.002	Pyrus communis	Timpurii de Dimbovita	-0.0208406	-0.0129109	0.00303701	0.00157157	Communis	Occidental	Admixed_Communis	P. communis A	Pyrus communis hybrid
PI 691226	CPYR_2628.003	Pyrus communis	Para Toto R-091	-0.0182014	0.00315413	-0.00348197	-0.00527223	Communis	Occidental	Admixed	P. communis F
PI 691227	CPYR_2629.003	Pyrus communis	Prosemica	-0.0176734	0.0101855	-0.00756641	0.0298189	Communis	Occidental	Admixed	P. communis hybrid	Pyrus communis hybrid
PI 665777	CPYR_2631.002	Pyrus communis	Sidi Bou Ali No 3 - Tunisia	-0.0191579	0.00251081	-0.00404071	0.0209008	Communis	Occidental	Admixed	P. communis E	Pyrus communis hybrid
PI 665781	CPYR_2638.002	Pyrus ×bretschneideri	Tsu Li 1	0.0434545	0.0143314	0.0496952	0.00171152	Group4	Oriental	Admixed	-	Pyrus pyrifolia/ussuriensis hybrid
PI 688106	CPYR_2639.003	Pyrus pyrifolia	Yang-Nai-Shian	0.0412186	0.0161725	0.0473174	0.000615807	Group4	Oriental	Admixed	-	Pyrus pyrifolia/ussuriensis hybrid
PI 541202	CPYR_264.002	Pyrus communis	HW 601 (Harrow, Ontario)	-0.0241572	-0.0353657	0.0113809	-0.0111655	Communis	Occidental	Admixed_Communis	P. communis B
PI 654923	CPYR_2642.002	Pyrus pyrifolia	Nepal 5053	0.0453413	0.00737855	0.0432183	0.00221505	Group4	Oriental	P. pyrifolia & ×sinkiangensis	-
PI 665788	CPYR_2646.003	Pyrus ×bretschneideri	Zao Su Li	0.0261127	0.00587054	0.0425696	-0.00103858	between European and Asian	Admixed	Admixed	-	Pyrus hybrid
PI 693202	CPYR_2649.002	Pyrus communis	Summer Beurré De Arenberg	-0.0230268	-0.0291674	0.00968283	-0.00646423	Communis	Occidental	Admixed_Communis	P. communis J
PI 541203	CPYR_265.001	Pyrus communis	Harvest Queen (HW 602)	-0.0258994	-0.0456486	0.0166208	-0.0178052	Communis	Occidental	Communis A	P. communis J
PI 654925	CPYR_2650.004	Pyrus communis	Marie Louise D'uccle	-0.0207781	-0.0133733	0.00280985	-0.0103174	Communis	Occidental	Admixed_Communis	P. communis F
PI 665789	CPYR_2651.002	Pyrus pyrifolia	Atago	0.0464853	0.0153029	0.0654447	0.00448499	Group4	Oriental	P. pyrifolia & ×sinkiangensis	-
PI 654926	CPYR_2654.002	Pyrus ×sinkiangensis	Joghoso I	-0.0152511	0.0201082	-0.00909904	0.000230723	Communis	Occidental	P. communis pyraster	P. communis pyraster	Pyrus communis subsp. pyraster
PI 654927	CPYR_2655.002	Pyrus communis	Gompapa	0.00244655	0.0204642	0.0069186	-0.00074913	between European and Asian	Admixed	Central-South Asia	-	Pyrus hybrid
PI 693210	CPYR_2659.003	Pyrus hybrid	Sur Tangoo (red pear)	-0.0231976	-0.0318044	0.0104746	-0.0149227	Communis	Occidental	Admixed_Communis	P. communis G	Pyrus communis
PI 665793	CPYR_2660.002	Pyrus hybrid	Spin Tangoo (white pear)	0.0136097	0.023578	0.0169527	-0.00309246	between European and Asian- but close to Group4	Admixed	Central-South Asia	-
PI 691231	CPYR_2661.002	Pyrus sp.	Bap Tangoo	0.0290103	0.00725882	0.0131516	0.000422755	between European and Asian, but closer to Group4	Oriental	Admixed	-	Pyrus hybrid
PI 688075	CPYR_2664.004	Pyrus sp.	Shinkwalay	0.010659	0.0176208	0.0120182	-0.000341006	between European and Asian	Admixed	Central-South Asia	-	Pyrus hybrid
PI 693199	CPYR_2667.003	Pyrus pashia	Kharnak III (donkey pear)	0.0494887	-0.0243325	-0.0307771	0.00726322	Group3	Oriental	P. calleryana & koehnei	-	Pyrus calleryana
PI 693208	CPYR_2671.002	Pyrus communis	Frashishi	-0.0151816	0.0167638	-0.00783175	0.000959325	Communis	Occidental	P. communis pyraster	P. communis pyraster	Pyrus communis subsp. pyraster
PI 688108	CPYR_2672.002	Pyrus pashia hybrid	Tan Chi II (little pear) - Pakistan	0.0262588	0.00806915	-0.000306974	-0.00496075	between European and Asian- but close to Group4	Admixed	Central-South Asia	-	Pyrus hybrid
PI 655572	CPYR_2673.002	Pyrus pashia hybrid	Tangay (P. pashia hybrid) - Pakistan	0.0369864	0.00402507	0.0123379	-0.00063133	between Group3 and 4	Oriental	Admixed	-	Pyrus hybrid
PI 691232	CPYR_2675.003	Pyrus hybrid	Khapa - large fruited P. pashia type	0.0266032	0.00858214	-0.00198129	-0.00146287	between European and Asian- but close to Group4	Admixed	Central-South Asia	-
PI 691233	CPYR_2677.002	Pyrus communis	HL-III-2/79	-0.022063	-0.0226716	0.00719172	-0.0168058	Communis	Occidental	Admixed_Communis	P. communis F
PI 654930	CPYR_2678.003	Pyrus communis	Vila	-0.0224327	-0.02167	0.00555812	-0.0139042	Communis	Occidental	Admixed_Communis	P. communis D
PI 665795	CPYR_2679.002	Pyrus communis	TE-1839 (Czech Republic)	-0.0211791	-0.0197941	0.00735114	-0.0051501	Communis	Occidental	Admixed_Communis	P. communis F
PI 315064	CPYR_268.001	Pyrus ussuriensis	Hang Pa Li	0.0186816	0.0161053	0.0226774	0.0019792	between European and Asian	Admixed	Central-South Asia	-	Pyrus hybrid
PI 688090	CPYR_2681.002	Pyrus ×bretschneideri	Xuehuali (Snowflake)	0.0465334	0.0125332	0.0563667	0.00384719	Group4	Oriental	P. pyrifolia & ×sinkiangensis	-	Pyrus pyrifolia
PI 688092	CPYR_2683.002	Pyrus salicifolia	P. salicifolia A-53-14 (Russia)	-0.0210386	-0.0134028	0.00234993	-0.00475969	Communis	Occidental	Admixed_Communis	P. communis F	Pyrus communis
PI 688157	CPYR_2685.003	Pyrus communis	Camusina di Bonarcado	-0.019067	0.00515596	-0.00486457	0.0117199	Communis	Occidental	Admixed	P. communis pyraster	Pyrus communis hybrid
PI 688078	CPYR_2686.003	Pyrus communis	Camusina di Cagliari	-0.018584	0.00840756	-0.00552678	0.00434613	Communis	Occidental	Admixed	P. communis E	Pyrus communis hybrid
PI 654933	CPYR_2689.002	Pyrus communis	De Su Duca	-0.0165188	0.00823184	-0.00426195	0.0082194	Communis	Occidental	Admixed	P. communis F	Pyrus communis hybrid
PI 541989	CPYR_269.003	Pyrus ussuriensis	Hau Kai	0.0410155	0.0192319	0.0477235	-0.00037716	Group4	Oriental	Admixed	-	Pyrus pyrifolia/ussuriensis hybrid
PI 693197	CPYR_2691.002	Pyrus communis	Mela di Laconi	-0.0184489	0.00198813	-0.00297052	-0.0111393	Communis	Occidental	Admixed	P. communis E
PI 665800	CPYR_2693.003	Pyrus communis	Etrusca	-0.019128	-0.000315847	-0.00259746	0.0128632	Communis	Occidental	Admixed	P. communis E	Pyrus communis hybrid
PI 654934	CPYR_2694.002	Pyrus communis	Tosca	-0.0223133	-0.0299996	0.0114563	-0.0115204	Communis	Occidental	Admixed_Communis	P. communis I
PI 654935	CPYR_2698.004	Pyrus communis	Zimska Kajuska	-0.0178544	0.00969407	-0.00676466	0.0211017	Communis	Occidental	Admixed	P. communis hybrid	Pyrus communis hybrid
PI 617679	CPYR_2699.003	Pyrus communis	BU 2/33 - Pyro II (P. communis rootstock clone)	-0.0206881	-0.0136281	0.00283064	-0.00733933	Communis	Occidental	Admixed_Communis	P. communis J
PI 541985	CPYR_27.002	Pyrus ussuriensis	Ba Li Xiang [Ba Li Hsiang]	0.0412523	0.0165781	0.0448493	0.000255936	Group4	Oriental	Admixed	-	Pyrus pyrifolia/ussuriensis hybrid
PI 541897	CPYR_270.001	Pyrus pyrifolia	Hawaii	0.0466587	0.0135314	0.0596047	0.00414058	Group4	Oriental	P. pyrifolia & ×sinkiangensis	-
PI 688093	CPYR_2700.001	Pyrus communis	OH-11 (Pyriam) Rootstock Selection	-0.0207576	-0.0147861	0.00403201	-0.00724723	Communis	Occidental	Admixed_Communis	P. communis J
PI 688112	CPYR_2701.001	Pyrus communis	96.FI.13 (P. communis rootstock clone)	-0.0185611	0.00118533	-0.00268112	-0.000383543	Communis	Occidental	Admixed	P. communis E	Pyrus communis hybrid
PI 688187	CPYR_2702.001	Pyrus communis	96.FI.14 (P. communis rootstock clone)	-0.0170476	0.0154371	-0.00830904	0.00209192	Communis	Occidental	Admixed	P. communis E	Pyrus communis hybrid
PI 617680	CPYR_2703.002	Pyrus communis	QR 708-2 (P. communis rootstock clone)	-0.00879528	-0.00859648	0.0097413	0.00250165	between European and Asian (closer to EU)	Occidental	Admixed	P. communis J
PI 688125	CPYR_2704.002	Pyrus communis	QR 708-12 (P. communis rootstock clone)	-0.0108536	-0.0128343	0.011551	0.00520546	between European and Asian	Occidental	Admixed	P. communis F
-	CPYR_2705.001	Pyrus communis	QR 708-36 (P. communis rootstock clone)	-0.0131309	-0.00870487	0.00746432	0.00742665	between European and Asian- but close to Communis	Occidental	Admixed	P. communis J
PI 654936	CPYR_2706.001	Pyrus communis	Bessemianka	-0.0184172	0.00564664	-0.00479726	0.0180571	Communis	Occidental	Admixed	P. communis E	Pyrus communis hybrid
PI 637991	CPYR_2709.001	Pyrus sp.	Jilin Market 99015	0.0454334	0.0143922	0.0559478	0.00273414	Group4	Oriental	P. pyrifolia & ×sinkiangensis	-	Pyrus pyrifolia
PI 255612	CPYR_271.008	Pyrus communis	Hebe	-0.0194852	-0.00538528	-0.000570831	0.00752582	Communis	Occidental	Admixed_Communis	P. communis B
PI 617683	CPYR_2711.001	Pyrus communis	Mission San Juan Bautista Pear	-0.0195284	-0.00255816	-0.00193815	0.00572611	Communis	Occidental	Admixed	P. communis E	Pyrus communis hybrid
PI 617685	CPYR_2713.001	Pyrus communis	I-5 Milepost 238	-0.0221417	-0.0211108	0.00601385	-0.00718007	Communis	Occidental	Admixed_Communis	P. communis F
PI 617686	CPYR_2714.002	Pyrus communis	Hager Grove Pioneer Pear	-0.0229375	-0.0247566	0.0079995	-0.00951892	Communis	Occidental	Communis B	P. communis D
PI 641281	CPYR_2716.001	Pyrus syriaca	P. syriaca - Israel (seedling)	-0.00313051	0.0663885	-0.0250554	-0.0486	Group2	Occidental	Admixed_Group1	P. elaeagrifolia & syriaca
PI 654937	CPYR_2718.001	Pyrus pashia hybrid	Nepal 5049	0.0440023	-0.00114551	0.0127041	0.00199646	between Group3 and 4	Oriental	Admixed	-	Pyrus hybrid
PI 654938	CPYR_2719.001	Pyrus pyrifolia	Nepal 5137	0.0442776	0.00205202	0.0218824	0.00192403	between Group3 and 4	Oriental	Admixed	-	Pyrus hybrid
PI 691230	CPYR_2721.002	Pyrus pyrifolia	Shoghori 1	-0.00221861	0.0232271	0.00190057	-0.00639027	between European and Asian- but close to Group1	Admixed	Central-South Asia	-	Pyrus hybrid
PI 688091	CPYR_2723.001	Pyrus ×sinkiangensis	Ho Mon	-0.0198614	-0.00966441	0.00178234	-0.00286161	Communis	Occidental	Admixed_Communis	P. communis A	Pyrus communis
PI 641282	CPYR_2724.001	Pyrus communis	Comtesse de Paris	-0.0229293	-0.0233875	0.00812964	-0.0108384	Communis	Occidental	Admixed_Communis	P. communis J
PI 688147	CPYR_2726.001	Pyrus ussuriensis	P. ussuriensis HVSC-053 - Khabarovsk, Russia	0.0339221	0.0281617	0.0480741	-0.00213667	Group4	Oriental	P. ussuriensis	-
PI 637995	CPYR_2730.001	Pyrus ussuriensis	P. ussuriensis 'Primorski Sour' - Khabarovsk sdlg. 1	0.0185711	0.0223087	0.0325753	0.00132213	between European and Asian	Admixed	North US-Canada	-	Pyrus hybrid
PI 637997	CPYR_2732.001	Pyrus hybrid	Le Conte	0.0116383	-0.00440633	0.0235683	-0.00838879	between European and Asian	Admixed	South-East US	-
PI 641283	CPYR_2738.001	Pyrus communis	Philip	0.00345286	-0.00897922	0.0319763	-0.0146596	between European and Asian	Admixed	North US-Canada	-	Pyrus hybrid
PI 665801	CPYR_2740.001	Pyrus communis	N 217-27.12 (rootstock selection)	-0.0184904	0.00586911	-0.00536635	0.0270208	Communis	Occidental	Admixed	P. communis hybrid	Pyrus communis hybrid
PI 654940	CPYR_2741.001	Pyrus communis	Sarteau Rogue	-0.0179053	0.00621516	-0.00456138	-0.0065789	Communis	Occidental	Admixed	P. communis E
PI 665806	CPYR_2742.001	Pyrus communis	India pear selection	0.00621971	0.00601257	-0.0119747	0.00412604	between European and Asian	Admixed	Central-South Asia	-	Pyrus hybrid
PI 693212	CPYR_2744.001	Pyrus communis	India NIC 19388	-0.0233452	-0.0297589	0.00969659	-0.0122276	Communis	Occidental	Admixed_Communis	P. communis G
PI 665807	CPYR_2748.001	Pyrus hybrid	India NIC 20814	0.0439479	0.00259181	0.0265102	0.00186928	between Group3 and 4	Oriental	Admixed	-
PI 654941	CPYR_2752.001	Pyrus hybrid	SIM 103-1 - Canada	-0.0247959	-0.0386842	0.0131512	-0.014548	Communis	Occidental	Admixed_Communis	P. communis G	Pyrus communis
PI 654942	CPYR_2753.002	Pyrus hybrid	SIM 117-11 (Alberta, Canada)	0.00437457	0.0114894	0.0198992	0.00347742	between European and Asian	Admixed	North US-Canada	-
PI 654943	CPYR_2754.001	Pyrus pyrifolia	Hakko	0.0469696	0.0182086	0.0746137	0.00464422	Group4	Oriental	P. pyrifolia & ×sinkiangensis	-
PI 665775	CPYR_2755.001	Pyrus communis	Romania 14/109 F2- F-2	-0.000653302	-0.0114934	0.0273555	-0.0089716	between European and Asian	Admixed	Admixed	-	Pyrus hybrid
PI 654944	CPYR_2756.001	Pyrus pyrifolia	Fu-Wu-Shian	0.0430951	0.0169941	0.0539653	0.00235212	Group4	Oriental	Admixed	-	Pyrus pyrifolia/ussuriensis hybrid
PI 654945	CPYR_2757.001	Pyrus communis	Bellissime d'Hiver	-0.0195056	-0.00339656	-0.0014967	0.00252299	Communis	Occidental	Communis E	P. communis E
PI 654946	CPYR_2758.001	Pyrus pyrifolia	Shoghori II	0.0178377	0.0195883	0.0257387	-0.00236719	between European and Asian	Admixed	Central-South Asia	-	Pyrus hybrid
PI 541205	CPYR_276.001	Pyrus communis	Hendre Huffcap	-0.0179406	0.00610247	-0.00486111	0.0112452	Communis	Occidental	Admixed	P. communis E	Pyrus communis hybrid
PI 688089	CPYR_2760.001	Pyrus salicifolia	P. salicifolia N1 - Russia	-0.0160842	0.0120861	-0.00656207	-0.00682774	Communis	Occidental	Admixed	P. communis hybrid	Pyrus hybrid
PI 654947	CPYR_2761.001	Pyrus sp.	P. salicifolia N65 - Russia	-0.00519756	0.0748496	-0.0303734	-0.0147349	Group2	Occidental	Group2	P. salicifolia & sachokiana	Pyrus salicifolia
PI 688096	CPYR_2764.001	Pyrus pyrifolia	Hong Yiungli	0.0235386	0.0239491	0.0281612	-0.00628611	between European and Asian- but close to Group4	Admixed	Central-South Asia	-	Pyrus hybrid
PI 654949	CPYR_2765.001	Pyrus ×sinkiangensis	Lantai Jululi	-0.0241668	-0.0351824	0.0114717	-0.0210991	Communis	Occidental	Admixed_Communis	P. communis J	Pyrus communis
PI 654950	CPYR_2768.001	Pyrus hybrid	B II-3-25-27 (Bartlett x P. salicifolia) - Russia	-0.0162005	0.010203	-0.0056821	-0.00359647	Communis	Occidental	Admixed	P. communis J
PI 654951	CPYR_2769.001	Pyrus hybrid	Nart	-0.00438963	-0.00574199	0.011624	0.00295628	between European and Asian	Occidental	Admixed	P. communis J
PI 541206	CPYR_277.002	Pyrus communis	Henri Desportes	-0.021563	-0.0205406	0.00591243	-0.0141371	Communis	Occidental	Admixed_Communis	P. communis J
PI 654961	CPYR_2770.001	Pyrus sp.	Tara Mrut [William Feldman]	6.63962e-05	0.0270005	0.00263687	-0.00559334	between European and Asian	Admixed	Central-South Asia	-	Pyrus hybrid
PI 654952	CPYR_2771.001	Pyrus sp.	Gorelde	-0.0175672	0.0133563	-0.00729715	0.00405904	Communis	Occidental	P. communis pyraster	P. communis pyraster	Pyrus communis subsp. pyraster
PI 665803	CPYR_2773.001	Pyrus (betulifolia?) hybrid	Vanovskaya 84-2 - Turkmenistan	0.0104862	-0.0393055	-0.0154119	-0.0192134	between European and Asian	Admixed	Admixed	-	Pyrus hybrid
PI 665805	CPYR_2774.001	Pyrus sp.	Birleshik 84-2 - Turkmenistan	-0.0163359	0.0193308	-0.00963834	0.00377273	Communis	Occidental	P. communis pyraster	P. communis pyraster	Pyrus communis subsp. pyraster
PI 654954	CPYR_2775.001	Pyrus sp.	Saarli 86-1 - Turkmenistan	0.00710837	0.022394	-0.0238719	-0.00209528	between European and Asian	Admixed	Admixed	-	Pyrus hybrid
PI 654955	CPYR_2776.001	Pyrus communis	Karadede 86-3 - Turkmenistan	-0.0151337	0.0210308	-0.0100392	0.00524536	Communis	Occidental	P. communis pyraster	P. communis pyraster	Pyrus communis subsp. pyraster
PI 654956	CPYR_2778.001	Pyrus hybrid	Domestic pear hybrid from Orel, Russia	0.0134206	0.008573	0.0277549	0.0118207	between European and Asian	Admixed	Admixed	-
PI 654957	CPYR_2779.001	Pyrus communis	Severyanka Kzasroshokaya	-0.0243449	-0.0335659	0.0107028	-0.0114154	Communis	Occidental	Admixed_Communis	P. communis G
PI 665812	CPYR_2782.001	Pyrus communis	Moorcroft	-0.0181141	0.00676206	-0.00582609	0.0206285	Communis	Occidental	Admixed	P. communis E	Pyrus communis hybrid
PI 688158	CPYR_2783.001	Pyrus communis	Beth	-0.0237878	-0.034721	0.011627	-0.0218381	Communis	Occidental	Admixed_Communis	P. communis J
PI 654958	CPYR_2784.001	Pyrus ussuriensis	Uzhi Li	0.0411482	0.017593	0.0473552	0.000429739	Group4	Oriental	Admixed	-	Pyrus pyrifolia/ussuriensis hybrid
PI 654960	CPYR_2786.001	Pyrus ×bretschneideri	Syan Li	0.0412308	0.00991247	0.0468752	0.00395345	Group4	Oriental	P. pyrifolia & ×sinkiangensis	-	Pyrus ×sinkiangensis
PI 541207	CPYR_279.002	Pyrus communis	Highland	-0.0232647	-0.0323179	0.0111304	-0.0260344	Communis	Occidental	Admixed_Communis	P. communis F
PI 657917	CPYR_2790.002	Pyrus syriaca	P. syriaca ARM-01-361 - Armenia	-0.00486788	0.0661535	-0.0262176	-0.00601391	Group2	Occidental	Group2	P. salicifolia & sachokiana	Pyrus salicifolia
PI 638000	CPYR_2797.001	Pyrus salicifolia	P. salicifolia ARM-02-067 - Armenia, Arpa Gorge	-0.00529735	0.0808746	-0.032405	-0.0193792	Group2	Occidental	Group2	P. salicifolia & sachokiana
PI 638000	CPYR_2797.003	Pyrus salicifolia	P. salicifolia ARM-02-067 - Armenia, Arpa Gorge	-0.00595528	0.0713765	-0.0289513	-0.0180106	Group2	Occidental	Group2	P. salicifolia & sachokiana
PI 657918	CPYR_2798.001	Pyrus salicifolia	P. salicifolia ARM-02-076 - Armenia, Arpa Gorge	-0.00501441	0.0811556	-0.0323852	-0.0209253	Group2	Occidental	Group2	P. salicifolia & sachokiana
PI 657918	CPYR_2798.003	Pyrus salicifolia	P. salicifolia ARM-02-076 - Armenia, Arpa Gorge	-0.00565263	0.0772961	-0.0310219	-0.0190825	Group2	Occidental	Group2	P. salicifolia & sachokiana
PI 641285	CPYR_2799.001	Pyrus communis subsp. caucasica	P. communis ssp. caucasica ARM-02-167 - Armenia, Vanadzor	-0.0148727	0.0293635	-0.0161536	0.0948503	Communis	Occidental	P. communis caucasica	P. communis caucasica A
PI 541320	CPYR_280.001	Pyrus communis	Honeysweet	-0.0229383	-0.0255713	0.00865995	-0.0156691	Communis	Occidental	Admixed_Communis	P. communis I
PI 665811	CPYR_2806.001	Pyrus communis	Green Horse	-0.0185223	0.00468647	-0.00475551	0.00532132	Communis	Occidental	Admixed	P. communis E
PI 641289	CPYR_2809.001	Pyrus hybrid	Bosarge	0.0462069	0.0149874	0.0626681	0.0041167	Group4	Oriental	P. pyrifolia & ×sinkiangensis	-	Pyrus pyrifolia
PI 541311	CPYR_281.001	Pyrus hybrid	Hood	0.0184414	-0.00980494	0.0297007	-0.00562766	between European and Asian	Admixed	South-East US	-
PI 638004	CPYR_2812.001	Pyrus communis subsp. caucasica	P. communis ssp. caucasica - Armenia, Spitaki-1	-0.0149057	0.0306078	-0.0163425	0.0934891	Communis	Occidental	P. communis caucasica	P. communis caucasica A
PI 638004	CPYR_2812.002	Pyrus communis subsp. caucasica	P. communis ssp. caucasica - Armenia, Spitaki-1	-0.0145256	0.0327162	-0.0173517	0.092517	Communis	Occidental	P. communis caucasica	P. communis caucasica A
PI 638005	CPYR_2813.001	Pyrus communis subsp. caucasica	P. communis ssp. caucasica - Armenia, Spitaki-2	-0.0149623	0.0303321	-0.0162337	0.09179	Communis	Occidental	P. communis caucasica	P. communis caucasica A
PI 638006	CPYR_2814.001	Pyrus communis subsp. caucasica	P. communis ssp. caucasica - Armenia, Spitaki-3	-0.0149558	0.0300817	-0.0159001	0.0947617	Communis	Occidental	P. communis caucasica	P. communis caucasica A
PI 638007	CPYR_2815.002	Pyrus communis subsp. caucasica	P. communis ssp. caucasica - Armenia, Spitaki-4	-0.0148199	0.0298426	-0.0159061	0.0922775	Communis	Occidental	P. communis caucasica	P. communis caucasica A
PI 638008	CPYR_2816.006	Pyrus communis subsp. caucasica	P. communis ssp. caucasica - Armenia 37	-0.0138546	0.0304739	-0.016074	0.0845837	Communis	Occidental	P. communis caucasica	P. communis caucasica A
PI 638009	CPYR_2817.001	Pyrus elaeagrifolia	P. elaeagrifolia - Armenia 38	-0.00733821	0.067445	-0.028461	0.0020875	Group2	Occidental	Group2	P. salicifolia & sachokiana	Pyrus salicifolia
PI 638011	CPYR_2819.001	Pyrus pyrifolia	Hamesi	0.029529	0.00703487	0.0501201	-2.14456e-05	Group4	Oriental	P. pyrifolia & ×sinkiangensis	-	uncertain
PI 638012	CPYR_2820.001	Pyrus pyrifolia	Choju (=Ichiban Nashi tm)	0.0468723	0.0159219	0.0688022	0.00440971	Group4	Oriental	P. pyrifolia & ×sinkiangensis	-
PI 657919	CPYR_2821.001	Pyrus pyrifolia	Mishirasu	0.0114164	-0.00378278	0.0323496	-0.00627257	between European and Asian	Admixed	Admixed	-	Pyrus hybrid
PI 665804	CPYR_2822.001	Pyrus sp.	Hyrs-Dere 84-1	-0.015357	0.0246841	-0.0112007	0.00101483	Group1?	Occidental	P. communis pyraster	P. communis pyraster	Pyrus communis subsp. pyraster
PI 638013	CPYR_2823.001	Pyrus communis	Bloodgood (=Julienne?)	-0.0229704	-0.0255742	0.00787698	-0.00793256	Communis	Occidental	Admixed_Communis	P. communis A
PI 638016	CPYR_2826.001	Pyrus communis	Yaquina (Payson)	-0.0187847	-0.000993416	-0.00181396	-0.000655799	Communis	Occidental	Admixed	P. communis E
PI 638018	CPYR_2828.006	Pyrus betulifolia	P. betulifolia 'Du Li' - Shaanxi, China	0.0502189	-0.036802	-0.0752798	-0.00823157	Group3	Oriental	P. betulaefolia	-
PI 638019	CPYR_2829.001	Pyrus communis	X-Ceptional	-0.0209299	-0.0136072	0.00314128	-0.00368091	Communis	Occidental	Admixed_Communis	P. communis A
PI 641292	CPYR_2835.003	Pyrus communis subsp. caucasica	P. communis ssp. caucasica GE-2004-037 - Georgia, Aregri Valley	-0.0150965	0.0295342	-0.0158247	0.094027	Communis	Occidental	P. communis caucasica	P. communis caucasica A
PI 641293	CPYR_2836.001	Pyrus communis subsp. caucasica	P. communis ssp. caucasica GE-2004-039 - Georgia, Shatili	-0.0151976	0.0295392	-0.0158857	0.0959213	Communis	Occidental	P. communis caucasica	P. communis caucasica A
PI 641294	CPYR_2837.001	Pyrus communis subsp. caucasica	P. communis ssp. caucasica GE-2004-041 - Georgia, Shatili	-0.0152932	0.0289519	-0.0157096	0.0959237	Communis	Occidental	P. communis caucasica	P. communis caucasica A
PI 641295	CPYR_2838.002	Pyrus communis subsp. caucasica	P. communis ssp. caucasica GE-2004-051 - Georgia, Barisakho	-0.0151991	0.0270223	-0.0152755	0.0897597	Communis	Occidental	P. communis caucasica	P. communis caucasica A
PI 641296	CPYR_2839.003	Pyrus communis subsp. caucasica	P. communis ssp. caucasica GE-2004-068 - Georgia, Bakuriani	-0.0151882	0.0284894	-0.0156647	0.0961682	Communis	Occidental	P. communis caucasica	P. communis caucasica A
PI 541208	CPYR_284.001	Pyrus communis	Hoskins	-0.0110683	-0.029217	0.018146	-0.0158591	between European and Asian	Occidental	Admixed_Communis	P. communis J
PI 641297	CPYR_2840.003	Pyrus communis subsp. caucasica	P. communis ssp. caucasica GE-2004-075 - Georgia, Satere	-0.0151923	0.0283264	-0.0158747	0.0967542	Communis	Occidental	P. communis caucasica	P. communis caucasica A
PI 641298	CPYR_2841.001	Pyrus communis subsp. caucasica	P. communis ssp. caucasica GE-2004-081 - Georgia, Bakuriani	-0.014933	0.0276674	-0.0155406	0.0943099	Communis	Occidental	P. communis caucasica	P. communis caucasica A
PI 641299	CPYR_2842.001	Pyrus communis subsp. caucasica	P. communis ssp. caucasica GE-2004-120 - Georgia, Nikortsminda	-0.0153748	0.0267449	-0.0146501	0.0908358	Communis	Occidental	P. communis caucasica	P. communis caucasica A
PI 641300	CPYR_2844.003	Pyrus communis subsp. caucasica	P. communis ssp. caucasica GE-2004-131 - Georgia, Kharagauli	-0.014609	0.0290658	-0.0154333	0.0855491	Communis	Occidental	P. communis caucasica	P. communis caucasica A
PI 641301	CPYR_2845.001	Pyrus communis subsp. caucasica	P. communis ssp. caucasica GE-2004-136 - Georgia, Kharagauli	-0.0150666	0.0269926	-0.0148011	0.0900372	Communis	Occidental	P. communis caucasica	P. communis caucasica A
PI 657920	CPYR_2846.001	Pyrus communis	Zebra Pear O.P. - Georgia	-0.0205136	-0.0112793	0.00195743	-0.00386563	Communis	Occidental	Admixed_Communis	P. communis F
PI 657920	CPYR_2846.002	Pyrus communis	Zebra Pear O.P. - Georgia	-0.0192268	-0.00447259	-0.000775466	-0.00205818	Communis	Occidental	Admixed_Communis	P. communis I
PI 657920	CPYR_2846.004	Pyrus communis	Zebra Pear O.P. - Georgia	-0.0164246	0.00117154	-0.000650803	0.000952552	Communis	Occidental	Admixed	P. communis A
PI 657920	CPYR_2846.005	Pyrus communis	Zebra Pear O.P. - Georgia	-0.0174947	0.00177888	-0.00166862	-0.00352594	Communis	Occidental	Admixed	P. communis F
PI 657920	CPYR_2846.006	Pyrus communis	Zebra Pear O.P. - Georgia	-0.0176141	-0.0025096	0.000804318	-0.00358997	Communis	Occidental	Admixed_Communis	P. communis F
PI 657921	CPYR_2849.001	Pyrus salicifolia	P. salicifolia GE-2004-141 - Akhaltsike, Georgia	-0.00570739	0.0789316	-0.0320114	-0.0101154	Group2	Occidental	Group2	P. salicifolia & sachokiana
PI 657921	CPYR_2849.002	Pyrus salicifolia	P. salicifolia GE-2004-141 - Akhaltsike, Georgia	-0.0061693	0.0694175	-0.028373	-0.00570891	Group2	Occidental	Group2	P. salicifolia & sachokiana
PI 541209	CPYR_285.003	Pyrus communis	Hourdequin	-0.0205735	-0.00884569	0.000903738	5.25114e-05	Communis	Occidental	Admixed_Communis	P. communis E
PI 654962	CPYR_2851.001	Pyrus communis	SIM 117-7 (Alberta, Canada)	0.0115288	0.00670536	0.0334146	-0.00577604	between European and Asian	Admixed	North US-Canada	-	Pyrus hybrid
PI 665784	CPYR_2854.001	Pyrus ×bretschneideri	Shian-Sui Li	0.0113552	-0.0011216	0.0341115	-0.00066214	between European and Asian	Admixed	Admixed	-	Pyrus hybrid
PI 665808	CPYR_2858.001	Pyrus communis	Pamyati Yakoleva	-0.0115652	-0.00269916	0.00944303	-0.0035332	between European and Asian- but close to Communis	Occidental	Admixed	P. communis J	Pyrus communis hybrid
PI 665773	CPYR_2859.001	Pyrus communis	Zutica	-0.0191986	-0.000725277	-0.00222966	0.00597603	Communis	Occidental	Communis E	P. communis E
PI 541210	CPYR_286.004	Pyrus communis	Howell - Sport	-0.0228961	-0.0277617	0.00863153	-0.00985985	Communis	Occidental	Admixed_Communis	P. communis A
PI 665774	CPYR_2860.001	Pyrus communis	Ilinjaca	-0.0164519	0.0131095	-0.00825926	0.0413958	Communis	Occidental	Admixed	P. communis hybrid	Pyrus communis hybrid
PI 665810	CPYR_2862.001	Pyrus communis	Jarve Seemik	-0.0200411	-0.00355575	-0.00157839	0.0164038	Communis	Occidental	Admixed_Communis	P. communis E	Pyrus communis hybrid
PI 654963	CPYR_2864.001	Pyrus communis	Sampionka	-0.021864	-0.0281166	0.00971715	-0.0115523	Communis	Occidental	Admixed_Communis	P. communis J
PI 691243	CPYR_2866.001	Pyrus communis subsp. caucasica	P. communis ssp. caucasica -Tavush Marz, Armenia	-0.0148732	0.0299714	-0.0160991	0.0913826	Communis	Occidental	P. communis caucasica	P. communis caucasica A
PI 691244	CPYR_2867.001	Pyrus communis	Plant de Blanc	-0.0170594	0.00875456	-0.00564321	0.0147192	Communis	Occidental	Admixed	P. communis E	Pyrus communis hybrid
PI 665780	CPYR_2869.001	Pyrus ussuriensis	Mian Suan (3x?)	0.0407445	0.0198445	0.0525065	0.00039291	Group4	Oriental	Admixed	-	Pyrus pyrifolia/ussuriensis hybrid
PI 691234	CPYR_2873.001	Pyrus communis	Diana	-0.0198167	-0.00792089	0.00104239	-0.00983115	Communis	Occidental	Admixed_Communis	P. communis D
PI 691235	CPYR_2874.001	Pyrus hybrid	B II-3 = 28-30	-0.0191325	-0.00298646	-0.000961898	-0.00648028	Communis	Occidental	Admixed_Communis	P. communis J	Pyrus communis
PI 688109	CPYR_2875.002	Pyrus hybrid	B II-3 = 34 = 36 P. salicifolia	-0.0195712	-0.00269941	-0.00156797	0.00540661	Communis	Occidental	Admixed_Communis	P. communis A	Pyrus communis
PI 665802	CPYR_2877.001	Pyrus communis	Shakarok	0.00997868	-0.0154906	0.0399775	-0.00805829	between European and Asian	Admixed	Admixed	-	Pyrus hybrid
PI 541990	CPYR_288.002	Pyrus ussuriensis	Huangxianshui Li [Huang Hsing Sui Li]	0.0387825	0.0189498	0.0442689	-0.000784446	Group4	Oriental	Admixed	-	Pyrus pyrifolia/ussuriensis hybrid
PI 657922	CPYR_2881.001	Pyrus communis	Blake's Pride	-0.0228944	-0.0286536	0.00925915	-0.0119086	Communis	Occidental	Admixed_Communis	P. communis I
PI 657923	CPYR_2882.001	Pyrus sachokiana	P. sachokiana GE-2006-115 - Georgia	-0.00874712	0.0657347	-0.0275427	-0.0022838	Group2	Occidental	Group2	P. salicifolia & sachokiana
PI 657923	CPYR_2882.002	Pyrus sachokiana	P. sachokiana GE-2006-115 - Georgia	-0.00803632	0.066674	-0.0275638	-0.0050429	Group2	Occidental	Group2	P. salicifolia & sachokiana
PI 657923	CPYR_2882.003	Pyrus sachokiana	P. sachokiana GE-2006-115 - Georgia	-0.00832044	0.0679585	-0.0282059	-0.00334314	Group2	Occidental	Group2	P. salicifolia & sachokiana
PI 657923	CPYR_2882.004	Pyrus sachokiana	P. sachokiana GE-2006-115 - Georgia	0.0128094	0.0162318	0.023941	-0.00489316	between European and Asian- but close to Group4	Admixed	Admixed	-	Pyrus hybrid
PI 657923	CPYR_2882.005	Pyrus sachokiana	P. sachokiana GE-2006-115 - Georgia	-0.0138696	0.0348239	-0.0164609	0.0430217	Communis/Group1	Occidental	Admixed	P. communis hybrid	Pyrus hybrid
PI 657924	CPYR_2883.002	Pyrus salicifolia	P. salicifolia GE-2006-111 - Georgia, Vashlovani	-0.0051117	0.0803481	-0.0318659	-0.0156256	Group2	Occidental	Group2	P. salicifolia & sachokiana
PI 657924	CPYR_2883.003	Pyrus salicifolia	P. salicifolia GE-2006-111 - Georgia, Vashlovani	-0.00502271	0.08171	-0.032552	-0.0180708	Group2	Occidental	Group2	P. salicifolia & sachokiana
PI 657925	CPYR_2884.001	Pyrus communis subsp. caucasica	P. (salicifolia hyb.) communis ssp. caucasica GE-2006-128 - Kakhe	-0.0102022	0.0537898	-0.0225993	0.0128853	Group1/2	Occidental	Admixed_Group1	P. salicifolia & sachokiana	Pyrus hybrid
PI 688115	CPYR_2892.002	Pyrus sachokiana	P. sachokiana GE-2006-114	-0.0114742	0.0455483	-0.0196842	0.00663695	Group1	Occidental	Admixed_Group1	P. communis hybrid	Pyrus hybrid
PI 688164	CPYR_2898.001	Pyrus communis	Hand Village Pear AM-2006-225	-0.0142319	0.0318675	-0.015333	0.0424641	Communis	Occidental	Admixed	P. communis hybrid	Pyrus communis hybrid
PI 688084	CPYR_2901.001	Pyrus hybrid	P. salicifolia large fruited hybrid AM-2006-186 - Armenia, Eghegi	-0.00633187	0.0624227	-0.0257313	0.00526924	Group2	Occidental	Admixed_Group1	P. salicifolia & sachokiana
PI 541993	CPYR_291.001	Pyrus ussuriensis	Hung Li	0.0461355	0.0100545	0.0495516	0.00402734	Group4	Oriental	P. pyrifolia & ×sinkiangensis	-	Pyrus pyrifolia
PI 688191	CPYR_2913.001	Pyrus communis	96.FI.12 (P. communis rootstock clone)	-0.0214379	-0.0174964	0.00488965	-0.0163237	Communis	Occidental	Admixed_Communis	P. communis D	Pyrus communis hybrid
CPYR 2915	CPYR_2915.001	Pyrus communis	G.45.11	-0.0208891	-0.0124957	0.00278377	-0.00871117	Communis	Occidental	Admixed_Communis	P. communis F	Pyrus communis hybrid
PI 280034	CPYR_292.001	Pyrus communis	Huyshe's Victoria	-0.0215768	-0.0186536	0.00539784	-0.0187182	Communis	Occidental	Admixed_Communis	P. communis F
PI 657927	CPYR_2920.001	Pyrus hybrid	David	0.00657116	0.0128251	0.0221109	0.00669849	between European and Asian	Admixed	North US-Canada	-
PI 657929	CPYR_2922.001	Pyrus communis	Sauvignac	-0.0208851	-0.012783	0.0030241	-0.00122511	Communis	Occidental	Admixed_Communis	P. communis F	Pyrus communis hybrid
PI 665741	CPYR_2925.001	Pyrus ussuriensis	P. ussuriensis 86-077 sdlg. C	0.0466436	0.0147347	0.0618408	0.00402971	Group4	Oriental	P. pyrifolia & ×sinkiangensis	-	Pyrus pyrifolia
PI 665742	CPYR_2926.001	Pyrus communis	Riehl Best	-0.0217784	-0.0189432	0.00499727	-0.0006966	Communis	Occidental	Admixed_Communis	P. communis F
PI 688074	CPYR_2928.001	Pyrus ussuriensis	Guan-Hong-Shieo	0.0430684	0.0135701	0.0451247	0.00165796	Group4	Oriental	Admixed	-	Pyrus pyrifolia/ussuriensis hybrid
PI 691239	CPYR_2929.001	Pyrus hybrid	India IC 20818	0.0440883	-0.00128496	0.0130788	0.00118278	between Group3 and 4	Oriental	Admixed	-
PI 693201	CPYR_2930.002	Pyrus communis	Lutsu Voipirn	-0.0184607	0.00646702	-0.00546344	0.0161373	Communis	Occidental	Admixed	P. communis E	Pyrus communis hybrid
PI 665744	CPYR_2932.001	Pyrus communis	Sunrise	-0.0240451	-0.0330828	0.0111136	-0.0126329	Communis	Occidental	Admixed_Communis	P. communis G
PI 665745	CPYR_2934.003	Pyrus ×sinkiangensis	Chinese Fragrant Pear Seedling 3	0.0440701	0.013369	0.0522527	0.0042255	Group4	Oriental	P. pyrifolia & ×sinkiangensis	-
PI 665745	CPYR_2934.004	Pyrus ×sinkiangensis	Chinese Fragrant Pear Seedling 4	0.0322436	0.0174454	0.0390475	0.000825882	Group4	Oriental	P. pyrifolia & ×sinkiangensis	-
PI 665745	CPYR_2934.005	Pyrus ×sinkiangensis	Chinese Fragrant Pear Seedling 5	0.0342806	0.0158825	0.0468655	0.0024909	Group4	Oriental	P. pyrifolia & ×sinkiangensis	-
PI 657932	CPYR_2935.002	Pyrus salicifolia	P. salicifolia - AZN-91 Azerbaijan	-0.00780009	0.066439	-0.0274203	-0.0115401	Group2	Occidental	Group2	P. salicifolia & sachokiana
PI 657932	CPYR_2935.006	Pyrus salicifolia	P. salicifolia - AZN-91 Azerbaijan	-0.0072176	0.0673726	-0.0274835	-0.0144367	Group2	Occidental	Group2	P. salicifolia & sachokiana
PI 665746	CPYR_2937.002	Pyrus ussuriensis	P. ussuriensis JPN-2009-145	0.0347708	0.0212719	0.0388695	-0.000764928	Group4	Oriental	Admixed	-	Pyrus pyrifolia/ussuriensis hybrid
PI 665748	CPYR_2939.001	Pyrus ussuriensis	P. ussuriensis JPN-2009-149	0.0374967	0.0187556	0.0423522	-0.000153159	Group4	Oriental	Admixed	-	Pyrus pyrifolia/ussuriensis hybrid
PI 352641	CPYR_294.001	Pyrus pyrifolia	Imamura Aki	0.0459126	0.0132769	0.0576326	0.00365227	Group4	Oriental	P. pyrifolia & ×sinkiangensis	-
PI 665750	CPYR_2941.001	Pyrus hybrid	Tennosui	0.0163231	-0.00351701	0.0440912	-0.00702873	between European and Asian- but close to Group4	Admixed	Admixed	-
PI 665751	CPYR_2942.001	Pyrus hybrid	Southern King	0.00637842	-0.00358698	0.0206544	-0.00692125	between European and Asian	Admixed	South-East US	-
PI 688149	CPYR_2944.001	Pyrus communis	De Cloche (3x)	-0.0182255	0.00274781	-0.00356688	0.00695957	Communis	Occidental	Communis E	P. communis E
PI 665813	CPYR_2945.001	Pyrus communis	Jaunette	-0.0183426	0.001537	-0.00314783	0.0138149	Communis	Occidental	Admixed	P. communis E
PI 665753	CPYR_2946.001_2	Pyrus communis	Beurré Crapaud	-0.0178404	0.00632238	-0.00502515	0.0165752	Communis	Occidental	Admixed	P. communis E	Pyrus communis hybrid
PI 688192	CPYR_2947.001	Pyrus communis	Faccia della Madonna	-0.0185826	0.00792888	-0.00607252	0.00583037	Communis	Occidental	P. communis pyraster	P. communis pyraster	Pyrus communis subsp. pyraster
PI 318871	CPYR_295.001	Pyrus dimorphophylla	P. dimorphophylla - Inunashi - Japan	0.042201	-0.00810906	-0.0198338	-0.000568281	Group3	Oriental	P. dimorphopylla & fauriei	-
PI 665754	CPYR_2951.001	Pyrus communis	Gldani Pear G10-120	-0.00254373	0.0213285	0.00269386	0.0442122	between European and Asian	Admixed	Admixed	-	Pyrus hybrid
PI 665755	CPYR_2952.001	Pyrus salicifolia	P. salicifolia - Georgia G10-122	-0.0111455	0.03588	-0.0144652	-0.0177844	Communis/Group1	Occidental	Admixed	P. communis hybrid	Pyrus hybrid
PI 665755	CPYR_2952.003	Pyrus salicifolia	P. salicifolia - Georgia G10-122	-0.00422018	0.0785365	-0.0314668	-0.0241061	Group2	Occidental	Group2	P. salicifolia & sachokiana
PI 688137	CPYR_2955.001	Pyrus communis	Horner 4	0.0114302	-0.0303005	-0.00985209	-0.0043571	between European and Asian	Admixed	Admixed	-	Pyrus hybrid
PI 688117	CPYR_2956.001	Pyrus communis	Horner 10	-0.0233453	-0.0318626	0.0105774	-0.0172075	Communis	Occidental	Admixed_Communis	P. communis I
PI 228013	CPYR_296.002	Pyrus pyrifolia	Ishiiwase	0.0466532	0.0161337	0.0678841	0.00401705	Group4	Oriental	P. pyrifolia & ×sinkiangensis	-
PI 688119	CPYR_2960.001	Pyrus communis	Rutter	-0.0231589	-0.027254	0.0086729	-0.0179891	Communis	Occidental	Admixed_Communis	P. communis F
PI 688120	CPYR_2961.002	Pyrus spinosa	P. spinosa ALB-2011-001	-0.00951666	0.0643673	-0.0274255	-0.0650771	Group2	Occidental	P. spinosa	P. spinosa
PI 688120	CPYR_2961.003	Pyrus spinosa	P. spinosa ALB-2011-001	-0.00964239	0.061208	-0.0262988	-0.0600436	Group2	Occidental	P. spinosa	P. spinosa
PI 665757	CPYR_2962.005	Pyrus spinosa	P. spinosa ALB-2011-007	-0.00920797	0.0648735	-0.0277492	-0.0668001	Group2	Occidental	P. spinosa	P. spinosa
PI 665757	CPYR_2962.006	Pyrus spinosa	P. spinosa ALB-2011-007	-0.00941112	0.0641114	-0.0270727	-0.0653415	Group2	Occidental	P. spinosa	P. spinosa
PI 665758	CPYR_2963.004	Pyrus spinosa	P. spinosa ALB-2011-010	-0.00973695	0.0603928	-0.0259018	-0.0578814	Group2	Occidental	P. spinosa	P. spinosa
PI 665759	CPYR_2964.001	Pyrus spinosa	P. spinosa ALB-2011-015	-0.00960878	0.064823	-0.0276412	-0.0694472	Group2	Occidental	P. spinosa	P. spinosa
PI 665759	CPYR_2964.005	Pyrus spinosa	P. spinosa ALB-2011-015	-0.00956158	0.0649142	-0.0274442	-0.0697842	Group2	Occidental	P. spinosa	P. spinosa
PI 665760	CPYR_2965.001	Pyrus communis subsp. pyraster	P. communis ssp. pyraster ALB-2011-024	-0.0158845	0.0147672	-0.0087759	0.0386479	Communis	Occidental	Admixed	P. communis hybrid	Pyrus communis hybrid
PI 665760	CPYR_2965.003	Pyrus communis subsp. pyraster	P. communis ssp. pyraster ALB-2011-024	-0.0158828	0.0146234	-0.00832474	0.0376685	Communis	Occidental	Admixed	P. communis hybrid	Pyrus communis hybrid
PI 665761	CPYR_2966.001	Pyrus spinosa	P. spinosa ALB-2011-028	-0.0092224	0.0669907	-0.0284555	-0.0700879	Group2	Occidental	P. spinosa	P. spinosa
PI 665762	CPYR_2967.002	Pyrus spinosa	P. spinosa ALB-2011-034	-0.00868474	0.0690583	-0.0291535	-0.075798	Group2	Occidental	P. spinosa	P. spinosa
PI 665762	CPYR_2967.004	Pyrus spinosa	P. spinosa ALB-2011-034	-0.0084686	0.0694956	-0.0298141	-0.0770744	Group2	Occidental	P. spinosa	P. spinosa
PI 665763	CPYR_2968.001	Pyrus spinosa	P. spinosa ALB-2011-038	-0.00897714	0.0672398	-0.028504	-0.0751049	Group2	Occidental	P. spinosa	P. spinosa
PI 665763	CPYR_2968.002	Pyrus spinosa	P. spinosa ALB-2011-038	-0.00912162	0.0670484	-0.0286939	-0.0725334	Group2	Occidental	P. spinosa	P. spinosa
PI 665764	CPYR_2969.002	Pyrus spinosa	P. spinosa ALB-2011-043	-0.00890949	0.0666191	-0.0283229	-0.0710958	Group2	Occidental	P. spinosa	P. spinosa
PI 665764	CPYR_2969.003	Pyrus spinosa	P. spinosa ALB-2011-043	-0.00893068	0.0663627	-0.0280853	-0.0715052	Group2	Occidental	P. spinosa	P. spinosa
PI 665765	CPYR_2970.001	Pyrus spinosa	P. spinosa ALB-2011-064	-0.00877974	0.0684655	-0.0292395	-0.0771613	Group2	Occidental	P. spinosa	P. spinosa
PI 665765	CPYR_2970.002	Pyrus spinosa	P. spinosa ALB-2011-064	-0.00850982	0.0695522	-0.029404	-0.0784406	Group2	Occidental	P. spinosa	P. spinosa
PI 665766	CPYR_2971.001	Pyrus spinosa	P. spinosa ALB-2011-067	-0.00882673	0.0691021	-0.0292878	-0.0781541	Group2	Occidental	P. spinosa	P. spinosa
PI 665766	CPYR_2971.004	Pyrus spinosa	P. spinosa ALB-2011-067	-0.00864339	0.06927	-0.0292954	-0.0762528	Group2	Occidental	P. spinosa	P. spinosa
PI 665767	CPYR_2972.003	Pyrus spinosa	P. spinosa ALB-2011-070	-0.00888239	0.0675963	-0.0288095	-0.0752626	Group2	Occidental	P. spinosa	P. spinosa
PI 665767	CPYR_2972.007	Pyrus spinosa	P. spinosa ALB-2011-070	-0.00877605	0.0612547	-0.0260798	-0.0679766	Group2	Occidental	P. spinosa	P. spinosa
PI 665768	CPYR_2973.001	Pyrus spinosa	P. spinosa ALB-2011-072	-0.00868444	0.0684461	-0.028917	-0.0770815	Group2	Occidental	P. spinosa	P. spinosa
PI 665768	CPYR_2973.002	Pyrus spinosa	P. spinosa ALB-2011-072	-0.00875739	0.0694645	-0.0297744	-0.0787189	Group2	Occidental	P. spinosa	P. spinosa
PI 665769	CPYR_2974.001	Pyrus spinosa	P. spinosa ALB-2011-078	-0.00907101	0.0687963	-0.0294483	-0.0758142	Group2	Occidental	P. spinosa	P. spinosa
PI 665769	CPYR_2974.002	Pyrus spinosa	P. spinosa ALB-2011-078	-0.00864208	0.0691819	-0.029297	-0.0769626	Group2	Occidental	P. spinosa	P. spinosa
PI 665770	CPYR_2975.002	Pyrus spinosa	P. spinosa ALB-2011-089a	-0.0100212	0.0583036	-0.0250057	-0.0612871	Group2	Occidental	P. spinosa	P. spinosa
-	CPYR_2975.004	Pyrus spinosa	P. spinosa ALB-2011-089b	-0.00880734	0.067354	-0.0289244	-0.0742308	Group2	Occidental	P. spinosa	P. spinosa
PI 665770	CPYR_2975.006	Pyrus spinosa	P. spinosa ALB-2011-089b	-0.00903156	0.0667718	-0.0289117	-0.0755624	Group2	Occidental	P. spinosa	P. spinosa
PI 691228	CPYR_2978.001	Pyrus communis	Malti	-0.0184749	0.00717761	-0.00546494	0.0153487	Communis	Occidental	Admixed	P. communis pyraster	Pyrus communis hybrid
PI 693198	CPYR_2980.001	Pyrus ×sinkiangensis	Keshinugeamut Li	0.0163093	0.0215915	0.0167258	-0.00190495	between European and Asian	Admixed	Central-South Asia	-	Pyrus hybrid
PI 691237	CPYR_2982.001	Pyrus sp.	Marut	0.0167189	0.0211724	0.0230389	-0.00494082	between European and Asian	Admixed	Central-South Asia	-	Pyrus hybrid
PI 693204	CPYR_2983.001	Pyrus communis	Birleshik 84-1 - Turkmenistan	-0.0249741	-0.0392326	0.0129902	-0.0208923	Communis	Occidental	Admixed_Communis	P. communis J
PI 693206	CPYR_2984.001	Pyrus communis	India NIC 19390	0.0415778	-0.00817547	-0.0160872	0.00132841	between Group3 and 4	Oriental	Admixed	-	Pyrus hybrid
PI 688102	CPYR_2986.001	Pyrus communis	Arlingham Squash	-0.0184174	0.00372791	-0.00369372	0.00839127	Communis	Occidental	Admixed	P. communis E
PI 688131	CPYR_2987.001	Pyrus communis	Oldfield	-0.018126	0.00429927	-0.00454298	0.0109319	Communis	Occidental	Admixed	P. communis E
PI 688121	CPYR_2988.001	Pyrus communis	Gem (US 71655-014)	-0.0229848	-0.0256209	0.00793468	-0.0104577	Communis	Occidental	Admixed_Communis	P. communis J
PI 665771	CPYR_2989.003	Pyrus ×sinkiangensis	Chinese Fragrant Pear	0.0396898	0.0141633	0.0496103	0.00300002	Group4	Oriental	P. pyrifolia & ×sinkiangensis	-
PI 665772	CPYR_2990.001	Pyrus ×bretschneideri	Ya Li seedling China source	0.0452667	0.0154146	0.0572141	0.00254647	Group4	Oriental	P. pyrifolia & ×sinkiangensis	-	Pyrus pyrifolia
PI 665772	CPYR_2990.003	Pyrus ×bretschneideri	Ya Li seedling China source	0.045934	0.0125806	0.0526382	0.00267736	Group4	Oriental	P. pyrifolia & ×sinkiangensis	-	Pyrus pyrifolia
PI 688202	CPYR_2992.001	Pyrus communis	Kings Valley Pear 1	-0.0196864	-0.00335076	-0.00140741	0.00814613	Communis	Occidental	Communis E	P. communis E
PI 688180	CPYR_2993.001	Pyrus communis	Kings Valley Pear 2	-0.019168	-0.00232777	-0.00176434	0.0100862	Communis	Occidental	Admixed	P. communis E
PI 542012	CPYR_3.003	Pyrus ussuriensis	P. ussuriensis K-8 (hybrid) - Korea	0.0386371	0.0206382	0.0495143	0.000218303	Group4	Oriental	Admixed	-	Pyrus pyrifolia/ussuriensis hybrid
PI 693196	CPYR_3000.001	Pyrus ussuriensis	Ba Li Shian	0.0414521	0.0180487	0.0476781	7.91232e-05	Group4	Oriental	Admixed	-	Pyrus pyrifolia/ussuriensis hybrid
PI 688126	CPYR_3003.001	Pyrus communis	Turkmenistan No. 8	-0.014748	0.0260233	-0.0113131	-0.00368869	Communis	Occidental	Admixed	P. communis pyraster	Pyrus hybrid
PI 688156	CPYR_3004.001	Pyrus pyrifolia	Tama	0.0470825	0.0172031	0.07213	0.00467917	Group4	Oriental	P. pyrifolia & ×sinkiangensis	-
PI 693213	CPYR_3006.001	Pyrus communis	Fowler Pear	-0.0224096	-0.0211088	0.00612832	-0.0073883	Communis	Occidental	Admixed_Communis	P. communis E
PI 307541	CPYR_301.002	Pyrus communis	Jalovcovka	-0.0224827	-0.0217074	0.00623082	-0.00453478	Communis	Occidental	Admixed_Communis	P. communis A	Pyrus communis hybrid
PI 688204	CPYR_3011.001	Pyrus communis	Suij	-0.0203439	-0.00943179	0.0012698	-0.0122593	Communis	Occidental	Admixed_Communis	P. communis E
PI 693214	CPYR_3014.001	Pyrus communis	Loreli's Favorite	-0.0215762	-0.0191856	0.00536324	-0.00158289	Communis	Occidental	Admixed_Communis	P. communis F	Pyrus communis hybrid
PI 49490	CPYR_3015.001	Pyrus communis	Giant Seckel	-0.00541088	-0.0203286	0.0182113	-0.00875781	between European and Asian	Occidental	Admixed_Communis	P. communis I
CPYR 3016	CPYR_3016.001	Pyrus communis	Flattened Pear	-0.0180907	0.00222698	-0.00371511	0.0165194	Communis	Occidental	Admixed	P. communis E	Pyrus communis hybrid
PI 541898	CPYR_303.003	Pyrus pyrifolia	Japanese Golden Russet	0.0466367	0.017327	0.0699564	0.00446766	Group4	Oriental	P. pyrifolia & ×sinkiangensis	-
PI 285530	CPYR_304.001	Pyrus communis	Johantorp	-0.0197984	-0.00500113	-0.000707489	0.00476897	Communis	Occidental	Admixed_Communis	P. communis A
PI 200378	CPYR_305.005	Pyrus communis	Josephine de Malines	-0.020723	-0.0169575	0.00488047	-0.0164476	Communis	Occidental	Admixed_Communis	P. communis F
PI 292376	CPYR_307.001	Pyrus communis	Jubileinaia	-0.024453	-0.0350795	0.0119636	-0.00992069	Communis	Occidental	Admixed_Communis	P. communis G
PI 541122	CPYR_31.003	Pyrus communis	Barillet Deschamp	-0.0206635	-0.0142731	0.00364602	-0.0074403	Communis	Occidental	Admixed_Communis	P. communis F
PI 282972	CPYR_311.004	Pyrus communis	Kair Aarmund	-0.0166463	0.0200059	-0.011912	0.0587575	Communis	Occidental	Admixed	P. communis hybrid	Pyrus communis hybrid
PI 40019	CPYR_314.001	Pyrus sp.	Kansu Pear	0.0382083	0.0101732	0.0177198	0.000516621	Group4	Oriental	Admixed	-	Pyrus hybrid
PI 228014	CPYR_317.003	Pyrus pyrifolia	Kikusui	0.0467856	0.0171533	0.0707853	0.00421192	Group4	Oriental	P. pyrifolia & ×sinkiangensis	-
PI 352633	CPYR_318.002	Pyrus pyrifolia	Kimizukawase	0.0465978	0.0161427	0.0676799	0.00410791	Group4	Oriental	P. pyrifolia & ×sinkiangensis	-
PI 307542	CPYR_320.002	Pyrus communis	Kiparyjska	-0.0199547	-0.00259563	-0.0017461	0.0112608	Communis	Occidental	Admixed	P. communis E
PI 352634	CPYR_322.001	Pyrus pyrifolia	Kosui	0.0472248	0.0173175	0.0726327	0.00461709	Group4	Oriental	P. pyrifolia & ×sinkiangensis	-
PI 295680	CPYR_327.003	Pyrus communis	Kruidernier	-0.019469	-0.00379431	-0.00109088	0.00474867	Communis	Occidental	Admixed	P. communis E
PI 228015	CPYR_329.001	Pyrus pyrifolia	Kumoi [Kumoe]	0.046747	0.0165119	0.0693028	0.00409411	Group4	Oriental	P. pyrifolia & ×sinkiangensis	-
PI 295092	CPYR_335.001	Pyrus communis	Lajre (3x)	-0.0201972	-0.0153736	0.00384035	-0.0135761	Communis	Occidental	Admixed_Communis	P. communis F
PI 541212	CPYR_339.002	Pyrus communis	Lawrence	-0.0218708	-0.0223278	0.00655634	-0.0119033	Communis	Occidental	Admixed_Communis	P. communis A
PI 541213	CPYR_340.001	Pyrus communis	Lawson	-0.0224118	-0.0213955	0.00654775	-0.00699651	Communis	Occidental	Admixed_Communis	P. communis F
PI 263682	CPYR_341.003	Pyrus communis	Le Brun	-0.0222962	-0.0269584	0.00924662	-0.0166441	Communis	Occidental	Admixed_Communis	P. communis J
PI 260158	CPYR_343.001	Pyrus communis	Le Lectier	-0.0210424	-0.016094	0.00372906	-0.0112112	Communis	Occidental	Admixed_Communis	P. communis F
PI 322035	CPYR_344.001	Pyrus communis	Le Nain Vert (Genetic Dwarf)	-0.0165407	0.00542232	-0.00232187	0.00441696	Communis	Occidental	Admixed	P. communis A
PI 541214	CPYR_345.003	Pyrus communis	Lehoux Grignon	-0.0207267	-0.015345	0.00422594	-0.0113392	Communis	Occidental	Admixed_Communis	P. communis F
PI 541215	CPYR_346.001	Pyrus communis	Lemon	-0.0179442	0.00781884	-0.00609365	0.0229562	Communis	Occidental	Admixed	P. communis E	Pyrus communis hybrid
PI 318867	CPYR_347.001	Pyrus communis	Leopardo Morettini	-0.0225336	-0.0246573	0.00748925	-0.0115431	Communis	Occidental	Admixed_Communis	P. communis A
PI 541124	CPYR_35.001	Pyrus communis	Barnet	-0.0175927	0.00730429	-0.00562085	0.00368342	Communis	Occidental	Communis E	P. communis E
PI 541216	CPYR_352.004	Pyrus communis	Lieutenant Poidevin	-0.0218077	-0.0231636	0.00688389	-0.0141658	Communis	Occidental	Admixed_Communis	P. communis F
PI 541217	CPYR_354.001	Pyrus communis	Lincoln	-0.0228555	-0.0258708	0.00809983	-0.00562996	Communis	Occidental	Admixed_Communis	P. communis F
PI 541994	CPYR_355.001	Pyrus ussuriensis	Lao Suan Li [Lo Suan Li]	0.0419019	0.0172844	0.04863	0.000175629	Group4	Oriental	Admixed	-	Pyrus pyrifolia/ussuriensis hybrid
PI 541219	CPYR_357.003	Pyrus communis	Longworth	-0.0207202	-0.00909955	0.000917631	0.00555613	Communis	Occidental	Admixed_Communis	P. communis E
PI 260159	CPYR_359.001	Pyrus communis	Louis Pasteur	-0.0205567	-0.0166498	0.00497442	-0.00578542	Communis	Occidental	Admixed_Communis	P. communis J
PI 215321	CPYR_36.002	Pyrus communis	Baronne Leroy	-0.0198425	-0.00903654	0.0023912	-0.0111243	Communis	Occidental	Admixed_Communis	P. communis F
PI 541221	CPYR_361.002	Pyrus communis	Louis Vilmorin	-0.0210011	-0.014444	0.0028838	-0.00658524	Communis	Occidental	Admixed_Communis	P. communis A
PI 541222	CPYR_362.001	Pyrus communis	Lowry No. 1	-0.0215904	-0.0188359	0.00596711	-0.0170991	Communis	Occidental	Admixed_Communis	P. communis J
PI 541223	CPYR_364.002	Pyrus communis	Lucy Duke	-0.0227507	-0.0239729	0.00718351	-0.0127617	Communis	Occidental	Admixed_Communis	P. communis J
PI 541322	CPYR_367.001	Pyrus communis	Luscious	-0.014995	-0.0202408	0.012779	-0.00790964	between European and Asian- but close to Communis	Occidental	Admixed_Communis	P. communis A
PI 541224	CPYR_370.001	Pyrus communis	Madame Andre Leroy	-0.0211718	-0.0151832	0.00332904	-0.0131131	Communis	Occidental	Admixed_Communis	P. communis F
PI 541225	CPYR_372.003	Pyrus communis	Madame Favre	-0.0189863	-0.00510092	0.000705658	-0.00418221	Communis	Occidental	Admixed_Communis	P. communis E
PI 541226	CPYR_373.003	Pyrus communis	Madame Lye Baltet	-0.0212881	-0.0191068	0.00525882	-0.013029	Communis	Occidental	Admixed_Communis	P. communis F
PI 123968	CPYR_374.002	Pyrus communis	Madame Soulanges	-0.0222852	-0.023577	0.00715015	-0.0156544	Communis	Occidental	Admixed_Communis	P. communis F
PI 300693	CPYR_38.001_07	Pyrus communis	Bartlett	-0.0254343	-0.0453088	0.0163634	-0.0235717	Communis	Occidental	Communis A	P. communis J
PI 541229	CPYR_381.005	Pyrus communis	Marguerite Marillat	-0.0241669	-0.0346704	0.0117377	-0.0153091	Communis	Occidental	Admixed_Communis	P. communis J
PI 541230	CPYR_382.002	Pyrus communis	Marie Louise	-0.0209671	-0.0164541	0.00476834	-0.00516333	Communis	Occidental	Admixed_Communis	P. communis F
PI 255615	CPYR_383.004	Pyrus communis	Mariette de Millepieds	-0.020363	-0.01272	0.00306979	-0.0105667	Communis	Occidental	Admixed_Communis	P. communis F
PI 231810	CPYR_389.002	Pyrus communis	Madame du Ballett	-0.0197263	-0.0156962	0.00519479	-0.0135624	Communis	Occidental	Admixed_Communis	P. communis A
PI 313932	CPYR_390.001	Pyrus elaeagrifolia	P. elaeagrifolia (hybrid)	-0.0099427	0.0542369	-0.0235151	0.0380721	Group2	Occidental	Admixed_Group1	P. salicifolia & sachokiana	Pyrus hybrid
PI 324132	CPYR_391.002	Pyrus communis	Mellina	-0.0230962	-0.0308993	0.0101626	-0.0218511	Communis	Occidental	Admixed_Communis	P. communis J
PI 541232	CPYR_392.002	Pyrus communis	Mendel	-0.0211151	-0.0241618	0.00927751	-0.0144309	Communis	Occidental	Admixed_Communis	P. communis J
PI 541233	CPYR_393.003	Pyrus communis	Messire Jean	-0.0182883	0.0039698	-0.00426223	-0.00197318	Communis	Occidental	Admixed	P. communis E
PI 541720	CPYR_395.002	Pyrus hybrid	Missouri No. 83	-0.000565757	-0.0139627	0.0212015	-0.00343656	between European and Asian	Admixed	Admixed	-
PI 541234	CPYR_397.002	Pyrus communis	Monchallard	-0.0212939	-0.0192962	0.00580783	5.19059e-05	Communis	Occidental	Admixed_Communis	P. communis A
PI 541314	CPYR_398.001	Pyrus communis	Mooers	-0.0121681	-0.0252816	0.0185989	-0.0111056	between European and Asian	Occidental	Admixed_Communis	P. communis F
PI 541315	CPYR_399.001	Pyrus communis	unknown	-0.0231299	-0.0289602	0.00921023	-0.0120199	Communis	Occidental	Admixed_Communis	P. communis G
PI 324125	CPYR_40.004	Pyrus communis	Bella di Giugno (=Mirandino Rosso)	-0.0196091	-0.00181407	-0.00205612	0.0131247	Communis	Occidental	Admixed	P. communis E	Pyrus communis hybrid
PI 324133	CPYR_401.003	Pyrus communis	Mora	-0.0212635	-0.0144393	0.00340075	-0.00337834	Communis	Occidental	Admixed_Communis	P. communis A
PI 318869	CPYR_402.001	Pyrus communis	Morettini 113	-0.0231839	-0.023505	0.00727326	0.0021	Communis	Occidental	Admixed_Communis	P. communis J
PI 282975	CPYR_403.003	Pyrus communis	Muskatelka Prava	-0.0179695	0.00793354	-0.00510139	0.00776612	Communis	Occidental	Admixed	P. communis E	Pyrus communis hybrid
PI 255616	CPYR_410.001	Pyrus communis	Napoleon	-0.0197585	-0.00709637	0.000446577	-0.00245434	Communis	Occidental	Admixed_Communis	P. communis F
PI 392317	CPYR_412.001	Pyrus pyrifolia	Niitaka (=Singo)	0.0463892	0.0158121	0.0657405	0.00414489	Group4	Oriental	P. pyrifolia & ×sinkiangensis	-
PI 224196	CPYR_413.001	Pyrus pyrifolia	Nijisseiki	0.0469089	0.0169541	0.0711842	0.00466493	Group4	Oriental	P. pyrifolia & ×sinkiangensis	-
PI 541728	CPYR_415.001	Pyrus hybrid	Nijisseiki x Old Home (Decline susceptible)	0.0121422	0.000935699	0.0394101	0.000859543	between European and Asian	Admixed	Admixed	-
PI 231806	CPYR_416.002	Pyrus communis	Normannischen Ciderbirne	-0.0174805	0.00711946	-0.00540472	0.0188812	Communis	Occidental	Admixed	P. communis E	Pyrus communis hybrid
PI 541235	CPYR_418.003	Pyrus communis	Notaire Lepin (= Doyenne George Boucher)	-0.0212465	-0.0220792	0.00702797	-0.0185027	Communis	Occidental	Admixed_Communis	P. communis F
PI 246419	CPYR_420.001	Pyrus communis	Nouveau Poiteau	-0.0209709	-0.0133938	0.00299269	-0.00418232	Communis	Occidental	Admixed_Communis	P. communis F
PI 292372	CPYR_421.003	Pyrus communis	Novogodnaia	0.0494907	-0.0243581	-0.03194	0.00668776	Group3	Oriental	P. calleryana & koehnei	-	Pyrus calleryana
PI 541237	CPYR_425.001	Pyrus communis	OH 20 fire blight resistant rootstock	0.0110056	-0.00571744	0.01925	-0.00225854	between European and Asian	Admixed	Admixed	-	Pyrus hybrid
PI 541238	CPYR_427.001	Pyrus hybrid	OH 50 fire blight resistant rootstock	-0.0225806	-0.0266865	0.00823818	-0.00711807	Communis	Occidental	Admixed_Communis	P. communis J	Pyrus communis
PI 392318	CPYR_428.001	Pyrus pyrifolia	Okusankichi	0.0459002	0.0154506	0.0631687	0.00426088	Group4	Oriental	P. pyrifolia & ×sinkiangensis	-
PI 541456	CPYR_431.001	Pyrus communis	Old Home	-0.0215008	-0.0163657	0.00384309	-0.00351649	Communis	Occidental	Communis Old Home	P. communis I
PI 437060	CPYR_432.001	Pyrus communis	Onward	-0.022525	-0.0267621	0.00839537	-0.0205106	Communis	Occidental	Admixed_Communis	P. communis F
PI 541239	CPYR_433.002	Pyrus hybrid	Orel No. 15	-0.0185059	0.00604815	-0.00537203	0.0141155	Communis	Occidental	Admixed	P. communis F
PI 541316	CPYR_435.001	Pyrus communis	Packham Late	-0.0217016	-0.0188444	0.00514283	-0.00979648	Communis	Occidental	Admixed_Communis	P. communis E
PI 280405	CPYR_436.001	Pyrus communis	Packham's Triumph	-0.021567	-0.0259334	0.00910701	-0.0153953	Communis	Occidental	Admixed_Communis	P. communis J
PI 541998	CPYR_439.001	Pyrus ussuriensis	Pai Li (Beijing White Pear)	0.0451409	0.0165146	0.0589105	0.00225528	Group4	Oriental	Admixed	-	Pyrus pyrifolia/ussuriensis hybrid
PI 541126	CPYR_44.004	Pyrus communis	Belle de Feron	-0.0215092	-0.0156276	0.00330141	0.00161283	Communis	Occidental	Admixed_Communis	P. communis A
PI 280035	CPYR_440.002	Pyrus communis	Parrot	-0.0213183	-0.0190132	0.00593721	-0.00993602	Communis	Occidental	Admixed_Communis	P. communis J
PI 131662	CPYR_441.001	Pyrus communis	Passe Crassane	-0.0204613	-0.0180778	0.00635941	-0.0136601	Communis	Occidental	Admixed_Communis	P. communis F
PI 541240	CPYR_446.001	Pyrus communis	P. Barry	-0.0191564	-0.0138066	0.0047279	-0.0143258	Communis	Occidental	Admixed_Communis	P. communis H
PI 541149	CPYR_90.002	Pyrus communis	Beurré Phillippe Delfosse	-0.0221905	-0.0222134	0.00591571	-0.00450336	Communis	Occidental	Admixed_Communis	P. communis J
PI 392321	CPYR_448.002	Pyrus communis	Pautalia (=Jubileer D'ar)	-0.0193168	0.00326982	-0.00474412	0.0271804	Communis	Occidental	Admixed	P. communis E	Pyrus communis hybrid
PI 541304	CPYR_45.001	Pyrus communis	Belle Poitevien	-0.0218058	-0.0216301	0.00695556	-0.0121906	Communis	Occidental	Admixed_Communis	P. communis F
PI 277526	CPYR_450.003	Pyrus communis	Petit Muscat	-0.0195122	0.000442389	-0.00263527	0.0189034	Communis	Occidental	Admixed	P. communis E	Pyrus communis hybrid
PI 541242	CPYR_451.002	Pyrus communis	Petit Blanquet	-0.0184889	0.00777608	-0.00596033	0.00889559	Communis	Occidental	Admixed	P. communis pyraster	Pyrus communis hybrid
PI 541999	CPYR_453.003	Pyrus ×bretschneideri	Ping Ding Li	0.0445343	0.0151262	0.0522225	0.00172758	Group4	Oriental	Admixed	-	Pyrus pyrifolia/ussuriensis hybrid
PI 267863	CPYR_455.002	Pyrus ussuriensis	Ping Guo Li [Pingo Li]	0.0430766	0.016968	0.0537954	0.00130767	Group4	Oriental	Admixed	-	Pyrus pyrifolia/ussuriensis hybrid
PI 324135	CPYR_457.002	Pyrus communis	Porporata	-0.0211901	-0.0133637	0.00349529	-0.0058484	Communis	Occidental	Admixed_Communis	P. communis J
PI 279338	CPYR_459.001	Pyrus communis	Precoce de Trevoux	-0.0245833	-0.0351689	0.0128542	-0.0119233	Communis	Occidental	Admixed_Communis	P. communis J
PI 322034	CPYR_46.001	Pyrus communis	Belle Guerandaise	-0.0183742	-0.00731755	0.00236235	-0.00998622	Communis	Occidental	Admixed_Communis	P. communis F
PI 541245	CPYR_466.002	Pyrus communis	President Loubet	-0.0203503	-0.00799076	0.000696002	0.00494642	Communis	Occidental	Admixed_Communis	P. communis J
PI 279339	CPYR_462.001	Pyrus communis	President Drouard	-0.0200802	-0.0192163	0.00650574	-0.00951561	Communis	Occidental	Admixed_Communis	P. communis H
PI 322036	CPYR_465.002	Pyrus communis	President Heron	-0.0228192	-0.0268779	0.00828287	-0.00984854	Communis	Occidental	Admixed_Communis	P. communis D
PI 264197	CPYR_467.002	Pyrus communis	President Osmonville 40	-0.0216724	-0.0270856	0.00978903	-0.0206882	Communis	Occidental	Admixed_Communis	P. communis J
PI 392322	CPYR_469.003	Pyrus communis	Progres	-0.0211096	-0.0127023	0.00327957	0.000254402	Communis	Occidental	Admixed_Communis	P. communis E
PI 541247	CPYR_470.002	Pyrus communis	Pulteney	-0.0215996	-0.0268407	0.00929438	-0.0125591	Communis	Occidental	Admixed_Communis	P. communis I
PI 292379	CPYR_471.004	Pyrus communis	Radchinskaia	-0.0183808	0.00648613	-0.00533267	0.0177341	Communis	Occidental	Admixed	P. communis E	Pyrus communis hybrid
PI 292377	CPYR_472.001	Pyrus communis	Ranniaia Mleevskaia (Mleevskaya Rannaya)	-0.0214995	-0.0132021	0.00277922	0.00421147	Communis	Occidental	Admixed_Communis	P. communis E	Pyrus communis hybrid
PI 541317	CPYR_474.001	Pyrus communis	Red Pear	-0.0180059	0.00720425	-0.00519526	0.0060614	Communis	Occidental	Admixed	P. communis E	Pyrus communis hybrid
PI 260152	CPYR_48.003	Pyrus communis	Belle Picarde	-0.0220397	-0.0202418	0.00594361	-0.00967015	Communis	Occidental	Admixed_Communis	P. communis A
PI 617504	CPYR_1361.001	Pyrus communis	OHxF 9	-0.0229197	-0.0280355	0.00879731	-0.00827936	Communis	Occidental	Admixed_Communis	P. communis J
PI 541250	CPYR_483.002	Pyrus communis	Reimer's Hybrid	-0.0227169	-0.0240271	0.00802434	-0.00304624	Communis	Occidental	Admixed_Communis	P. communis J
PI 541251	CPYR_484.002	Pyrus communis	Reliance	-0.0200498	-0.00869925	0.00168479	-0.00724943	Communis	Occidental	Admixed_Communis	P. communis F
PI 541715	CPYR_486.004	Pyrus hybrid	Richard Peters	-0.00528978	-0.0211418	0.0208275	-0.0113047	between European and Asian	Occidental	Admixed	P. communis B
PI 286384	CPYR_487.001	Pyrus communis	Rocha	-0.0227608	-0.0228008	0.00649676	-0.0150754	Communis	Occidental	Admixed_Communis	P. communis A
PI 541252	CPYR_488.001	Pyrus communis	Rogue Red	-0.02197	-0.0220033	0.00704163	-0.0193201	Communis	Occidental	Admixed_Communis	P. communis F
PI 541253	CPYR_489.002	Pyrus communis	Roi Charles de Wurttemberg	-0.0215326	-0.0187827	0.00477676	-0.014078	Communis	Occidental	Communis C	P. communis F
PI 260161	CPYR_490.004	Pyrus communis	King Sobieski	-0.0192061	0.000337323	-0.00313641	0.0204211	Communis	Occidental	Admixed	P. communis E	Pyrus communis hybrid
PI 541254	CPYR_491.004	Pyrus communis	Rosee de Juillet	-0.0199514	-0.0057345	-0.00025499	0.000137023	Communis	Occidental	Admixed_Communis	P. communis E
PI 295094	CPYR_494.002	Pyrus communis	Rotkottig Frau Ostergotland	-0.0191665	0.00396574	-0.00451896	0.00892362	Communis	Occidental	Admixed	P. communis E	Pyrus communis hybrid
PI 541256	CPYR_496.001	Pyrus communis	Rousselet de Reims	-0.0187188	0.00378442	-0.00347758	0.00549706	Communis	Occidental	Communis E	P. communis F
PI 337444	CPYR_497.001	Pyrus communis	Rousselet of Stuttgart x Dr. Jules Guyot No. II	-0.0211604	-0.0132539	0.00358805	-0.00576395	Communis	Occidental	Admixed_Communis	P. communis D
PI 337446	CPYR_499.001	Pyrus communis	Rousselet of Stuttgart x Dr. Jules Guyot No. VII (Vavilov)	-0.0218574	-0.0160261	0.00374689	-0.0020665	Communis	Occidental	Admixed_Communis	P. communis J
PI 541911	CPYR_5.009	Pyrus pyrifolia	P. pyrifolia K-31 - Korea	0.0442217	0.0104666	0.040981	0.00257915	Group4	Oriental	Admixed	-	Pyrus pyrifolia/ussuriensis hybrid
PI 337448	CPYR_501.001	Pyrus communis	Rousselet of Stuttgart x Dr. Jules Guyot No. IX	-0.0214954	-0.0167189	0.00447497	-0.0032188	Communis	Occidental	Admixed_Communis	P. communis D
PI 541257	CPYR_502.003	Pyrus communis	Royale Vendee	-0.0199092	-0.0113344	0.00352908	-0.0146934	Communis	Occidental	Communis D	P. communis F
PI 279936	CPYR_504.001	Pyrus communis	RX 196	-0.0237715	-0.0344314	0.0117529	-0.0170331	Communis	Occidental	Admixed_Communis	P. communis D
PI 279937	CPYR_505.002	Pyrus communis	RX 226	-0.024029	-0.0333088	0.0108142	-0.0187761	Communis	Occidental	Admixed_Communis	P. communis J
PI 279940	CPYR_507.002	Pyrus communis	RX 274	-0.0238633	-0.032674	0.010868	-0.0157949	Communis	Occidental	Admixed_Communis	P. communis J
PI 541259	CPYR_508.001	Pyrus communis	Saint Andre	-0.0208549	-0.0237046	0.00925862	-0.017089	Communis	Occidental	Admixed_Communis	P. communis F
PI 541260	CPYR_509.001	Pyrus communis	Saint Ghislain	-0.0223682	-0.0233958	0.00698764	-0.00544703	Communis	Occidental	Admixed_Communis	P. communis F
PI 541127	CPYR_51.002	Pyrus communis	Bergamotte d'Automne	-0.0142508	0.0123184	-0.00411056	0.0142221	Communis	Occidental	Admixed	P. communis H
PI 277529	CPYR_512.004	Pyrus communis	Sanguinole	-0.0225962	-0.0195777	0.0051498	-0.0049799	Communis	Occidental	Admixed_Communis	P. communis D	Pyrus communis hybrid
PI 215329	CPYR_513.003	Pyrus communis	Santa Claus	-0.0211732	-0.0126363	0.00267517	-0.00984977	Communis	Occidental	Admixed_Communis	P. communis F
PI 295095	CPYR_514.005	Pyrus communis	Santa Maria	-0.0214963	-0.0248378	0.00942048	-0.0148621	Communis	Occidental	Admixed_Communis	P. communis F
PI 286220	CPYR_516.002	Pyrus communis	Scipiona	-0.0153737	0.0131525	-0.00589441	-0.00168592	Communis	Occidental	Admixed	P. communis A	Pyrus communis hybrid
PI 541262	CPYR_519.001	Pyrus communis	Seckel	-0.0228096	-0.0238796	0.00801834	-0.00964552	Communis	Occidental	Admixed_Communis	P. communis J
PI 541128	CPYR_52.002	Pyrus communis	Bergamote d'Ete	-0.019146	-0.000227286	-0.00227716	0.00136018	Communis	Occidental	Communis E	P. communis E
PI 228017	CPYR_520.001	Pyrus pyrifolia	Seigyoku	0.0468448	0.0162952	0.0698268	0.00432902	Group4	Oriental	P. pyrifolia & ×sinkiangensis	-
PI 541263	CPYR_521.002	Pyrus communis	Senateur Belle	-0.0211918	-0.0183126	0.00546421	-0.00912199	Communis	Occidental	Admixed_Communis	P. communis E
PI 352635	CPYR_526.002	Pyrus pyrifolia	Shinko	0.0465925	0.0146772	0.0638577	0.00452097	Group4	Oriental	P. pyrifolia & ×sinkiangensis	-
PI 352638	CPYR_527.002	Pyrus pyrifolia	Shinseiho	0.046369	0.0170621	0.0696642	0.00445341	Group4	Oriental	P. pyrifolia & ×sinkiangensis	-
PI 224087	CPYR_528.001	Pyrus pyrifolia	Shinseiki	0.047344	0.0158275	0.0688996	0.0047542	Group4	Oriental	P. pyrifolia & ×sinkiangensis	-
PI 352636	CPYR_529.001	Pyrus pyrifolia	Shinsui	0.0467754	0.0172027	0.070076	0.00416649	Group4	Oriental	P. pyrifolia & ×sinkiangensis	-
PI 260153	CPYR_53.001	Pyrus communis	Bergamotte Esperen	-0.0187561	-0.00520831	0.000627775	-0.00337284	Communis	Occidental	Admixed_Communis	P. communis J
PI 278731	CPYR_533.001	Pyrus pyrifolia	Sivaganga Estate	0.0447511	0.00700893	0.0437484	0.00153584	Group4	Oriental	P. pyrifolia & ×sinkiangensis	-
PI 127716	CPYR_534.001	Pyrus hybrid	Sladky	-0.00676239	-0.00622919	0.0162835	-0.00197636	between European and Asian	Occidental	Admixed	P. communis F
PI 541716	CPYR_535.001	Pyrus hybrid	Smith	0.0107047	-0.00744577	0.0238077	-0.00169798	between European and Asian	Admixed	South-East US	-
PI 282978	CPYR_537.001	Pyrus communis	Solanka	-0.0195477	-0.00270181	-0.00183098	0.00517727	Communis	Occidental	Admixed	P. communis E
PI 541129	CPYR_54.002	Pyrus communis	Bergamotte Sageret	-0.0190357	-0.00508787	0.000296002	0.00581764	Communis	Occidental	Admixed_Communis	P. communis F
PI 541231	CPYR_547.001	Pyrus communis	Maxine	-0.0233537	-0.0285468	0.00865855	-0.00632069	Communis	Occidental	Admixed_Communis	P. communis A
PI 541266	CPYR_548.002	Pyrus communis	Stout	-0.0183838	-0.00291838	0.00058608	-0.00223797	Communis	Occidental	Admixed_Communis	P. communis A
PI 541268	CPYR_550.002	Pyrus communis	Success de la Meilleraye	-0.0210799	-0.0165001	0.00463945	-0.0149878	Communis	Occidental	Admixed_Communis	P. communis J
PI 541269	CPYR_553.002	Pyrus communis	Sucre Verte	-0.0181612	0.00499666	-0.00413676	0.0105984	Communis	Occidental	Admixed	P. communis F	Pyrus communis hybrid
PI 352637	CPYR_554.001	Pyrus pyrifolia	Suisei	0.0470189	0.0176761	0.0721831	0.00427805	Group4	Oriental	P. pyrifolia & ×sinkiangensis	-
PI 312507	CPYR_556.001	Pyrus communis	Summer Blood Birne	-0.0185506	0.00645637	-0.00518806	0.0109799	Communis	Occidental	Admixed	P. communis E	Pyrus communis hybrid
PI 264698	CPYR_557.002	Pyrus communis	Summer Muskatel Birne	-0.0230352	-0.0244413	0.00702446	-0.00102359	Communis	Occidental	Admixed_Communis	P. communis A
PI 541150	CPYR_558.002	Pyrus communis	Beurré Superfin	-0.0218309	-0.0193639	0.00528186	-0.0121184	Communis	Occidental	Admixed_Communis	P. communis J
PI 541270	CPYR_559.001_2	Pyrus communis	Suzette de Bavay	-0.0236792	-0.0318167	0.0108507	-0.0123644	Communis	Occidental	Admixed_Communis	P. communis J
PI 541130	CPYR_56.002	Pyrus communis	Besi d'Hery	-0.0185054	-0.000122287	-0.00178458	-0.00459737	Communis	Occidental	Communis E	P. communis E
PI 542002	CPYR_562.003	Pyrus ussuriensis	Da Tou Huang [Ta Tau Huang]	0.0411209	0.0192102	0.0511863	0.000615034	Group4	Oriental	Admixed	-	Pyrus pyrifolia/ussuriensis hybrid
PI 282979	CPYR_563.003	Pyrus communis	Talasova Zimni	-0.0186408	0.00345156	-0.0040401	-0.00262149	Communis	Occidental	Admixed	P. communis A
PI 541271	CPYR_567.001	Pyrus communis	Taynton Squash	-0.0181713	0.00460912	-0.0046509	0.015796	Communis	Occidental	Admixed	P. communis E	Pyrus communis hybrid
PI 541272	CPYR_568.002	Pyrus communis	Tedrow Beauty	-0.0218109	-0.0203568	0.0059247	-0.0129537	Communis	Occidental	Admixed_Communis	P. communis J
PI 541273	CPYR_569.001	Pyrus communis	Thorn	-0.0186174	0.00317264	-0.00425591	0.0141806	Communis	Occidental	Communis E	P. communis E
PI 541131	CPYR_57.001	Pyrus communis	Besi de La Motte	-0.0173568	-0.0024651	0.000185161	0.0071712	Communis	Occidental	Admixed_Communis	P. communis J
PI 352660	CPYR_572.001	Pyrus communis	Timpurii de Voinsati	-0.0221063	-0.0193795	0.00527894	0.000852291	Communis	Occidental	Admixed_Communis	P. communis A	Pyrus communis hybrid
PI 134606	CPYR_573.002	Pyrus hybrid	Tioma	0.00695207	0.0156024	0.0219781	0.00589762	between European and Asian	Admixed	North US-Canada	-
PI 295097	CPYR_574.003	Pyrus communis	Tirelemont	-0.0220305	-0.0184319	0.00464006	-0.00790109	Communis	Occidental	Admixed_Communis	P. communis F
PI 295098	CPYR_577.001	Pyrus communis	Tongre (=Durondeau)	-0.0221823	-0.0180694	0.00446551	-0.0053071	Communis	Occidental	Admixed_Communis	P. communis F
PI 260162	CPYR_578.001	Pyrus communis	Tonkowietka	-0.0180664	0.00795064	-0.00586432	0.0216371	Communis	Occidental	Admixed	P. communis hybrid	Pyrus communis hybrid
PI 282980	CPYR_579.002	Pyrus communis	Toulouska pozdni	-0.0197643	-0.0150207	0.00549133	-0.0105551	Communis	Occidental	Admixed_Communis	P. communis A
PI 137080	CPYR_581.002	Pyrus communis	Triomphe de Touraine	-0.019443	-0.0101942	0.00262455	-0.00826609	Communis	Occidental	Admixed_Communis	P. communis F
PI 541275	CPYR_582.003	Pyrus communis	Triomphe de Vienne	-0.0231346	-0.0318678	0.0106329	-0.0167954	Communis	Occidental	Admixed_Communis	P. communis J
PI 292373	CPYR_583.002	Pyrus communis	Trubchanka Popularnaia	-0.0189986	0.00340138	-0.00408685	0.0168355	Communis	Occidental	Admixed	P. communis pyraster	Pyrus communis hybrid
PI 541276	CPYR_586.001	Pyrus communis	USDA No. 463	-0.0241811	-0.0335793	0.0121426	-0.0191484	Communis	Occidental	Admixed_Communis	P. communis J
PI 64229	CPYR_588.001	Pyrus hybrid	Van Fleet Hybrid No. 1	0.0121658	0.00273584	0.0331004	0.00147361	between European and Asian	Admixed	Admixed	-
PI 541133	CPYR_59.002	Pyrus communis	Beurré Clairgeau	-0.0226789	-0.0237368	0.0063528	-0.0137335	Communis	Occidental	Communis C	P. communis I
PI 541277	CPYR_592.001	Pyrus communis	Vermont Beauty	-0.0226766	-0.0246261	0.00778385	-0.0147257	Communis	Occidental	Admixed_Communis	P. communis F
PI 541278	CPYR_593.002	Pyrus communis	Verte Longue d'Automne	-0.0152995	0.00940026	-0.00302478	0.00524834	Communis	Occidental	Admixed	P. communis F
PI 145821	CPYR_596.001	Pyrus hybrid	Vineland 29018	0.00970525	-0.0169229	0.0352002	-0.00931361	between European and Asian	Admixed	Admixed	-
PI 541279	CPYR_597.002	Pyrus communis	W-1 fire blight resistant rootstock	-0.0180059	0.00546241	-0.00430643	0.0129552	Communis	Occidental	Admixed	P. communis E	Pyrus communis hybrid
PI 66131	CPYR_598.001	Pyrus hybrid	Waite (Canner)	-0.0243344	-0.0343703	0.0118605	-0.0108565	Communis	Occidental	Admixed_Communis	P. communis G	Pyrus communis
PI 541280	CPYR_599.001	Pyrus communis	Warner	-0.0231074	-0.0253086	0.00714354	-0.000457391	Communis	Occidental	Admixed_Communis	P. communis A
PI 541912	CPYR_6.008	Pyrus pyrifolia	P. pyrifolia K-16 - Korea	0.0439995	0.0115389	0.0441285	0.00199895	Group4	Oriental	Admixed	-	Pyrus pyrifolia/ussuriensis hybrid
PI 541281	CPYR_602.004	Pyrus communis	White Doyenne	-0.0254348	-0.0424351	0.0147159	-0.0205752	Communis	Occidental	Communis B	P. communis A
PI 541282	CPYR_603.002	Pyrus communis	White Star	-0.0158873	0.00421525	-0.00115503	0.000323591	Communis	Occidental	Admixed	P. communis F
PI 279341	CPYR_612.001	Pyrus communis	Williams Precoce Morettini	-0.0231131	-0.0254162	0.00797757	-0.0051266	Communis	Occidental	Admixed_Communis	P. communis F
PI 541286	CPYR_619.001	Pyrus communis	Worden Seckle	-0.0211111	-0.0144573	0.00411027	-0.00424199	Communis	Occidental	Admixed_Communis	P. communis B
PI 541136	CPYR_62.003	Pyrus communis	Beurré d'Angleterre	-0.0207186	-0.0112006	0.00202658	-0.00324119	Communis	Occidental	Admixed_Communis	P. communis F
PI 45845	CPYR_620.001	Pyrus ×bretschneideri	Yaguang Li [Ya Kuang Li]	0.0437566	0.0165199	0.0525412	0.00130748	Group4	Oriental	Admixed	-	Pyrus pyrifolia/ussuriensis hybrid
PI 224089	CPYR_622.001	Pyrus pyrifolia	Yakumo	0.0468633	0.0173997	0.0712368	0.00442086	Group4	Oriental	P. pyrifolia & ×sinkiangensis	-
PI 541287	CPYR_625.001	Pyrus communis	Yellow Huffcap	-0.0184477	0.00352045	-0.00462143	0.0101238	Communis	Occidental	Admixed	P. communis E
PI 541956	CPYR_629.001	Pyrus sp.	Kansu x self	0.00581077	-0.0132302	0.0156323	-0.00885957	between European and Asian	Admixed	Admixed	-	Pyrus hybrid
PI 617502	CPYR_63.001	Pyrus communis	Anjou	-0.0228442	-0.0249813	0.00756163	-0.00919776	Communis	Occidental	Admixed_Communis	P. communis G
PI 540924	CPYR_633.001	Pyrus spinosa	P. spinosa (amygdaliformis) - Turkey	-0.00843182	0.0687885	-0.0291142	-0.0748201	Group2	Occidental	P. spinosa	P. spinosa
PI 540929	CPYR_634.001	Pyrus spinosa	P. spinosa (amygdaliformis) - Turkey	-0.00859842	0.0715662	-0.0298949	-0.0779244	Group2	Occidental	P. spinosa	P. spinosa
PI 540930	CPYR_635.001	Pyrus spinosa	P. spinosa (amygdaliformis) - Turkey	-0.00866109	0.0665619	-0.0281552	-0.0723176	Group2	Occidental	P. spinosa	P. spinosa
PI 349021	CPYR_636.001	Pyrus spinosa	P. spinosa (amygdaliformis) - Macedonia (pure)	-0.00938126	0.062851	-0.0266058	-0.0716984	Group2	Occidental	P. spinosa	P. spinosa
PI 349021	CPYR_637.001	Pyrus spinosa	P. spinosa (amygdaliformis) - Macedonia (pure)	-0.00931894	0.0648812	-0.0276035	-0.0718299	Group2	Occidental	P. spinosa	P. spinosa
PI 349021	CPYR_638.001	Pyrus spinosa	P. spinosa (amygdaliformis) - Macedonia	-0.00953922	0.0646579	-0.0275329	-0.0717246	Group2	Occidental	P. spinosa	P. spinosa
PI 540922	CPYR_639.001	Pyrus spinosa	P. spinosa (amygdaliformis) - Greece	-0.0101918	0.062002	-0.0262825	-0.0679357	Group2	Occidental	P. spinosa	P. spinosa
PI 295083	CPYR_64.003	Pyrus communis	Beurré d'Arenberg	-0.0192472	-0.00792325	0.00154323	6.70918e-05	Communis	Occidental	Admixed_Communis	P. communis F
PI 540923	CPYR_641.001	Pyrus spinosa	P. spinosa (amygdaliformis) - Greece (hybrid?)	-0.00940508	0.0646092	-0.0276495	-0.0708361	Group2	Occidental	P. spinosa	P. spinosa
PI 540931	CPYR_642.001	Pyrus spinosa	P. spinosa (amygdaliformis) - Greece	-0.00984261	0.0625978	-0.0268201	-0.06781	Group2	Occidental	P. spinosa	P. spinosa
PI 322707	CPYR_646.001	Pyrus betulifolia	P. betulifolia - Ukraine	0.0493603	-0.0365613	-0.0754056	-0.00812612	Group3	Oriental	P. betulaefolia	-
PI 540947	CPYR_647.002	Pyrus betulifolia	P. betulifolia	0.0493406	-0.0283096	-0.052824	-0.00589397	Group3	Oriental	P. betulaefolia	-
PI 541718	CPYR_648.001	Pyrus hybrid	P. betulifolia hybrid	0.0489508	-0.024567	-0.0429847	-0.00514039	Group3	Oriental	Admixed_Group3	-
PI 540945	CPYR_655.001	Pyrus betulifolia	OPR-113 P. betulifolia No. 4	0.0485371	-0.0356619	-0.074818	-0.00833012	Group3	Oriental	P. betulaefolia	-
PI 541137	CPYR_65.002	Pyrus communis	Beurré de Bollwiller	-0.0210205	-0.0203518	0.00660878	-0.0146815	Communis	Occidental	Admixed_Communis	P. communis F
PI 541729	CPYR_650.001	Pyrus hybrid	P. calleryana x P. fauriei	0.0472437	-0.0189326	-0.0311424	0.00318301	Group3	Oriental	Admixed_Group3	-
PI 540948	CPYR_651.001	Pyrus betulifolia	P. betulifolia	0.0486208	-0.0355741	-0.0744024	-0.00788475	Group3	Oriental	P. betulaefolia	-
PI 540949	CPYR_652.001	Pyrus betulifolia	P. betulifolia 3	0.0491748	-0.0387534	-0.0797836	-0.008813	Group3	Oriental	P. betulaefolia	-
PI 540943	CPYR_653.001	Pyrus betulifolia	OPR-110 P. betulifolia No. 1	0.0490881	-0.0378155	-0.0780591	-0.00877022	Group3	Oriental	P. betulaefolia	-
PI 322285	CPYR_684.001	Pyrus communis subsp. caucasica	P. communis ssp. caucasica - Ukraine	-0.0167867	0.0175028	-0.0102682	0.0491917	Communis	Occidental	Admixed	P. communis hybrid	Pyrus communis hybrid
PI 540946	CPYR_656.001	Pyrus betulifolia	OPR-114 P. betulifolia No. 5	0.0492112	-0.0388286	-0.080839	-0.00917674	Group3	Oriental	P. betulaefolia	-
PI 540943	CPYR_657.001	Pyrus betulifolia	P. betulifolia	0.0487875	-0.0379477	-0.0790834	-0.00891702	Group3	Oriental	P. betulaefolia	-
PI 540944	CPYR_658.001	Pyrus betulifolia	P. betulifolia	0.0491331	-0.0385087	-0.0798585	-0.00932321	Group3	Oriental	P. betulaefolia	-
PI 541008	CPYR_659.001	Pyrus cordata	P. boissieriana (received as)	-0.00838856	0.0346526	-0.0141211	-0.00100706	Group1	Occidental	Admixed_Group1	P. communis hybrid	uncertain
PI 420809	CPYR_661.001	Pyrus calleryana	P. calleryana	0.0146965	-0.00712138	-0.0154857	0.0164764	between European and Asian	Admixed	Admixed	-	Pyrus hybrid
PI 541013	CPYR_662.001	Pyrus calleryana	Capital (P. calleryana)	0.0493409	-0.0244551	-0.0323182	0.00590577	Group3	Oriental	P. calleryana & koehnei	-
PI 541021	CPYR_663.001	Pyrus calleryana	P. calleryana	0.0484589	-0.0259977	-0.0372968	0.00654973	Group3	Oriental	P. calleryana & koehnei	-
PI 420995	CPYR_664.001	Pyrus calleryana	Whitehouse (P. calleryana)	0.0488615	-0.020041	-0.0222146	0.0062186	Group3	Oriental	P. calleryana & koehnei	-
PI 214185	CPYR_665.001	Pyrus calleryana	P. calleryana D6	0.0493328	-0.0256465	-0.035316	0.00672349	Group3	Oriental	P. calleryana & koehnei	-
PI 541009	CPYR_666.001	Pyrus calleryana	P. calleryana	0.0488494	-0.0263277	-0.0363029	0.00627427	Group3	Oriental	P. calleryana & koehnei	-
PI 541025	CPYR_667.001	Pyrus calleryana	OPR-268 P. calleryana	0.0495131	-0.0264492	-0.0374027	0.00652302	Group3	Oriental	P. calleryana & koehnei	-
PI 541026	CPYR_668.001	Pyrus calleryana	P. calleryana	0.0491283	-0.0261637	-0.0359599	0.00706471	Group3	Oriental	P. calleryana & koehnei	-
PI 541010	CPYR_669.001	Pyrus calleryana	P. calleryana	0.0493058	-0.026357	-0.0359086	0.00735555	Group3	Oriental	P. calleryana & koehnei	-
PI 541011	CPYR_670.001	Pyrus calleryana	P. calleryana	0.0495968	-0.0254796	-0.0341437	0.00693809	Group3	Oriental	P. calleryana & koehnei	-
PI 541017	CPYR_671.001	Pyrus calleryana	P. calleryana No. 11	0.0423676	-0.0221915	-0.0313623	0.00514797	Group3	Oriental	P. calleryana & koehnei	-
PI 541027	CPYR_672.002	Pyrus calleryana	P. calleryana (hybrid)	0.0466027	-0.00718716	0.00800154	0.00497823	Group3	Oriental	Admixed	-	Pyrus hybrid
PI 541018	CPYR_673.001	Pyrus calleryana	P. calleryana PC-5	0.0483174	-0.0254479	-0.034884	0.00714575	Group3	Oriental	P. calleryana & koehnei	-
PI 617505	CPYR_674.001	Pyrus calleryana	P. calleryana PC-6	0.0495797	-0.0267303	-0.037432	0.00721596	Group3	Oriental	P. calleryana & koehnei	-
PI 132091	CPYR_677.001	Pyrus fauriei	P. fauriei Arnold Arboretum	0.0436917	0.000975832	0.0108116	0.00143291	between Group3 and 4	Oriental	Admixed	-	Pyrus hybrid
PI 313928	CPYR_678.001	Pyrus calleryana f. graciliflora	P. calleryana v. graciliflora	0.0483283	-0.020948	-0.0238484	0.00580464	Group3	Oriental	P. calleryana & koehnei	-
PI 263679	CPYR_68.002	Pyrus communis	Beurré de Jonghe	-0.018984	-0.00922993	0.00240343	-0.011236	Communis	Occidental	Admixed_Communis	P. communis D
PI 313929	CPYR_680.001	Pyrus communis subsp. caucasica	P. communis ssp. caucasica - U.S.S.R.	-0.0152202	0.0275434	-0.0153001	0.0976891	Communis	Occidental	P. communis caucasica	P. communis caucasica A
PI 541563	CPYR_681.001	Pyrus communis subsp. caucasica	P. communis ssp. caucasica No.6	-0.0151303	0.0285621	-0.015655	0.0998131	Communis	Occidental	P. communis caucasica	P. communis caucasica A
PI 541289	CPYR_682.001	Pyrus communis subsp. caucasica	P. communis ssp. caucasica Mag 4 - Pyatigorsk, Russia	-0.0150683	0.0287929	-0.015985	0.0979275	Communis	Occidental	P. communis caucasica	P. communis caucasica A
PI 322286	CPYR_685.001	Pyrus communis subsp. caucasica	P. communis ssp. caucasica - Ukraine	-0.0166231	0.0183163	-0.0101469	0.0323185	Communis	Occidental	Admixed	P. communis hybrid	Pyrus communis hybrid
PI 541957	CPYR_686.002	Pyrus communis subsp. caucasica	P. communis ssp. caucasica F-25	-0.0182147	0.00549306	-0.00548667	0.0190487	Communis	Occidental	Admixed	P. communis E	Pyrus communis hybrid
PI 337437	CPYR_687.001	Pyrus communis subsp. caucasica	P. communis ssp. caucasica - Stavropol	-0.016181	0.0200734	-0.0114777	0.0647517	Communis	Occidental	Admixed	P. salicifolia & sachokiana	Pyrus communis hybrid
PI 337438	CPYR_688.001	Pyrus communis subsp. caucasica	P. communis ssp. caucasica - Stavropol	-0.016784	0.0185232	-0.0107751	0.0680075	Communis	Occidental	Admixed	P. communis hybrid	Pyrus communis hybrid
PI 337439	CPYR_689.001	Pyrus communis subsp. caucasica	P. communis ssp. caucasica - Stavropol	-0.017895	0.0110571	-0.00723617	0.0301806	Communis	Occidental	Admixed	P. communis hybrid	Pyrus communis hybrid
PI 541139	CPYR_69.002	Pyrus communis	Beurré de Nantes	-0.0217732	-0.0228429	0.007377	-0.0156161	Communis	Occidental	Admixed_Communis	P. communis J
PI 337441	CPYR_690.001	Pyrus communis subsp. caucasica	P. communis ssp. caucasica - Stavropol	-0.0152406	0.0279109	-0.0153947	0.0984009	Communis	Occidental	P. communis caucasica	P. communis caucasica A
PI 541290	CPYR_691.001	Pyrus communis subsp. caucasica	P. communis ssp. caucasica Mag 1 - Pyatigorsk, Russia	-0.0155775	0.0276162	-0.0152701	0.0997423	Communis	Occidental	P. communis caucasica	P. communis caucasica A
PI 541560	CPYR_692.001	Pyrus communis subsp. caucasica	P. communis ssp. caucasica Mag 5 - Pyatigorsk, Russia	-0.0152775	0.0288735	-0.0160957	0.0998808	Communis	Occidental	P. communis caucasica	P. communis caucasica A
PI 541291	CPYR_693.001	Pyrus communis subsp. pyraster	P. communis ssp. pyraster Olez 5 - Turkey	-0.0187518	0.00651782	-0.00579034	0.018413	Communis	Occidental	P. communis pyraster	P. communis pyraster
PI 440631	CPYR_694.001	Pyrus communis subsp. caucasica	P. communis ssp. caucasica - Gofitskoye	-0.016919	0.016772	-0.0101151	0.0492942	Communis	Occidental	Admixed	P. communis hybrid	Pyrus communis hybrid
PI 440631	CPYR_695.001	Pyrus communis subsp. caucasica	P. communis ssp. caucasica - Gofitskoye	-0.0167839	0.0181136	-0.0103848	0.0494073	Communis	Occidental	Admixed	P. communis hybrid	Pyrus communis hybrid
PI 440632	CPYR_697.001	Pyrus communis subsp. caucasica	P. communis ssp. caucasica - Gofitskoye	-0.0162208	0.0192044	-0.0112201	0.0619549	Communis	Occidental	Admixed	P. communis hybrid	Pyrus communis hybrid
PI 440632	CPYR_698.001	Pyrus communis subsp. caucasica	P. communis ssp. caucasica - Gofitskoye	-0.0169048	0.0165756	-0.00997036	0.0527024	Communis	Occidental	Admixed	P. communis hybrid	Pyrus communis hybrid
PI 541440	CPYR_699.001	Pyrus communis	P. communis	-0.0183401	0.00336361	-0.00449103	0.0185636	Communis	Occidental	Admixed	P. communis E	Pyrus communis hybrid
PI 541140	CPYR_70.003	Pyrus communis	Beurré de Saint Nicolas	-0.0211915	-0.0179341	0.00565776	-0.00815402	Communis	Occidental	Admixed_Communis	P. communis F
PI 541318	CPYR_701.001	Pyrus communis	LA-62 (Virus Indicator)	-0.0181007	0.00323211	-0.00365456	0.00988605	Communis	Occidental	Admixed	P. communis E
PI 541561	CPYR_702.001	Pyrus communis subsp. caucasica	P. communis ssp. caucasica Mag 2 - Pyatigorsk, Russia	-0.0153867	0.028169	-0.0154317	0.0985352	Communis	Occidental	P. communis caucasica	P. communis caucasica A
PI 392324	CPYR_704.002	Pyrus communis	Kustendil No. 510	-0.0211311	-0.0177653	0.0049486	-0.0138164	Communis	Occidental	Communis D	P. communis F
PI 392325	CPYR_705.001	Pyrus communis	Kustendil No. 980	-0.0209062	-0.0131824	0.00344277	-0.00263104	Communis	Occidental	Admixed_Communis	P. communis A	Pyrus communis hybrid
PI 541439	CPYR_708.001	Pyrus communis	B-13 (Bartlett seedling - Virus Indicator)	-0.0235961	-0.0289699	0.00929734	-0.00935864	Communis	Occidental	Admixed_Communis	P. communis A
PI 541369	CPYR_709.001	Pyrus communis	OHxF 51	-0.0235309	-0.0314285	0.0106048	-0.0145025	Communis	Occidental	Admixed_Communis	P. communis I
PI 541292	CPYR_710.001	Pyrus communis subsp. pyraster	P. communis ssp. pyraster Olez 1 - Turkey	-0.0181084	0.0107115	-0.0068402	0.0211424	Communis	Occidental	P. communis pyraster	P. communis pyraster
PI 324130	CPYR_711.001	Pyrus communis	IP-1100	-0.0220263	-0.0229607	0.0064084	-0.0161117	Communis	Occidental	Admixed_Communis	P. communis D
PI 541323	CPYR_712.001	Pyrus communis subsp. pyraster	P. communis ssp. pyraster - Turkey	-0.0184767	0.00923898	-0.00625952	0.0157064	Communis	Occidental	P. communis pyraster	P. communis pyraster
PI 541294	CPYR_715.002	Pyrus communis	P-12 fire blight resistant rootstock	-0.0182264	0.00344406	-0.00384238	0.00753232	Communis	Occidental	Communis E	P. communis A
PI 541295	CPYR_716.001	Pyrus communis subsp. pyraster	P-18 (Oregon 18) fire blight resistant rootstock	-0.015368	0.015701	-0.00889067	0.0382116	Communis	Occidental	Admixed	P. communis hybrid	Pyrus communis hybrid
PI 440629	CPYR_717.001	Pyrus communis subsp. caucasica	P. communis ssp. caucasica - Stavropol	-0.015429	0.0273525	-0.0150426	0.0994119	Communis	Occidental	P. communis caucasica	P. communis caucasica A
PI 440629	CPYR_718.001	Pyrus communis subsp. caucasica	P. communis ssp. caucasica - Stavropol	-0.0156252	0.0260588	-0.0147239	0.0935591	Communis	Occidental	P. communis caucasica	P. communis caucasica A
PI 440629	CPYR_719.001	Pyrus communis subsp. caucasica	P. communis ssp. caucasica - Stavropol	-0.0153582	0.0271778	-0.0150054	0.0988024	Communis	Occidental	P. communis caucasica	P. communis caucasica A
PI 255607	CPYR_72.004	Pyrus communis	Beurré Dubuisson	-0.0214199	-0.0198955	0.0060259	-0.0168602	Communis	Occidental	Admixed_Communis	P. communis J
PI 440629	CPYR_720.001	Pyrus communis subsp. caucasica	P. communis ssp. caucasica - Stavropol	-0.0152298	0.0285129	-0.0153445	0.0989615	Communis	Occidental	P. communis caucasica	P. communis caucasica A
PI 440629	CPYR_721.001	Pyrus communis subsp. caucasica	P. communis ssp. caucasica - Stavropol	-0.0153912	0.026392	-0.0150396	0.097363	Communis	Occidental	P. communis caucasica	P. communis caucasica A
PI 541296	CPYR_722.002	Pyrus communis	P-70 fire blight resistant rootstock	-0.0162297	0.0126803	-0.0078059	0.0390872	Communis	Occidental	Admixed	P. communis hybrid	Pyrus communis hybrid
PI 541297	CPYR_723.002	Pyrus communis	P-79 fire blight resistant rootstock	-0.0177342	0.00722324	-0.00558662	0.00371819	Communis	Occidental	Admixed	P. communis E
PI 541298	CPYR_724.001	Pyrus communis subsp. pyraster	P-87 fire blight resistant rootstock	-0.016559	0.0148555	-0.00852868	0.0212678	Communis	Occidental	Admixed	P. communis E	Pyrus communis hybrid
PI 541859	CPYR_725.002	Pyrus nivalis	P. nivalis P-91 (pure)	-0.0169661	0.00927722	-0.00639073	0.0145019	Communis	Occidental	Admixed	P. communis E	Pyrus communis hybrid
PI 541370	CPYR_726.001	Pyrus communis	OHxF 97	-0.0232975	-0.0299195	0.00976769	-0.0111427	Communis	Occidental	Admixed_Communis	P. communis I
PI 440630	CPYR_727.001	Pyrus communis subsp. caucasica	P. communis ssp. caucasica - Yankulyski	-0.0162299	0.0222909	-0.0132204	0.0865267	Communis	Occidental	P. communis caucasica	P. communis caucasica A
PI 440630	CPYR_728.001	Pyrus communis subsp. caucasica	P. communis ssp. caucasica - Yankulyski	-0.0166129	0.0211718	-0.0126814	0.0767715	Communis	Occidental	Admixed	P. communis caucasica A	Pyrus communis hybrid
PI 440630	CPYR_729.001	Pyrus communis subsp. caucasica	P. communis ssp. caucasica - Yankulyski	-0.0165682	0.0216342	-0.0129173	0.078306	Communis	Occidental	Admixed	P. communis caucasica A	Pyrus communis hybrid
PI 440630	CPYR_730.001	Pyrus communis subsp. caucasica	P. communis ssp. caucasica - Yankulyski	-0.0163351	0.0214253	-0.0127834	0.0768422	Communis	Occidental	Admixed	P. communis caucasica A	Pyrus communis hybrid
PI 541321	CPYR_731.001	Pyrus communis subsp. caucasica	P. communis ssp. caucasica - Yankulyski	-0.0167217	0.0196034	-0.0120017	0.0747831	Communis	Occidental	Admixed	P. communis caucasica A	Pyrus communis hybrid
PI 541373	CPYR_734.001	Pyrus communis	OHxF 288	-0.0231665	-0.0314792	0.0106486	-0.014709	Communis	Occidental	Admixed_Communis	P. communis D
PI 541374	CPYR_735.001	Pyrus communis	OHxF 361	-0.0237718	-0.0319355	0.0103257	-0.0101872	Communis	Occidental	Admixed_Communis	P. communis D
PI 313930	CPYR_736.001	Pyrus ×complexa	P. complexa [x complexa]	-0.00969731	0.0516107	-0.0219525	0.0222443	Group1/2	Occidental	Admixed_Group1	P. salicifolia & sachokiana	Pyrus hybrid
PI 541571	CPYR_739.001	Pyrus cordata	P. cordata - Turkey	-0.00830384	0.0480493	-0.0209699	-0.0149502	Group1	Occidental	P. cordata & mamorensis	P. cordata
PI 541142	CPYR_74.002	Pyrus communis	Beurré Dumont	-0.0240789	-0.0337608	0.0110406	-0.0138471	Communis	Occidental	Admixed_Communis	P. communis G
PI 541572	CPYR_740.001	Pyrus cordata	P. cordata - Turkey	-0.00823963	0.0489227	-0.0211189	-0.0154476	Group1	Occidental	P. cordata & mamorensis	P. cordata
PI 541573	CPYR_741.001	Pyrus cordata	P. cordata - Turkey	-0.00814405	0.0470801	-0.0202373	-0.0136879	Group1	Occidental	P. cordata & mamorensis	P. cordata
PI 541574	CPYR_742.001	Pyrus cordata	P. cordata - Turkey	-0.00828757	0.0464285	-0.0202526	-0.0133135	Group1	Occidental	P. cordata & mamorensis	P. cordata
PI 541576	CPYR_744.001	Pyrus cordata	P. cordata - Turkey	-0.00818557	0.048613	-0.0210518	-0.0161243	Group1	Occidental	P. cordata & mamorensis	P. cordata
PI 617506	CPYR_745.001	Pyrus cordata	P. cordata (pure) - France	-0.00825205	0.0332778	-0.0136041	0.0264566	Group1	Occidental	Admixed_Group1	P. mamorensis	uncertain
PI 541577	CPYR_747.001	Pyrus cordata	P. cordata (hybrid) - France	-0.0143479	0.00532839	-0.00244741	0.00448624	Communis	Occidental	Admixed	P. communis A	Pyrus hybrid
PI 541579	CPYR_749.001	Pyrus cordata	P. cordata - France	-0.00876406	0.0305506	-0.0125293	0.0240889	Group1	Occidental	Admixed_Group1	P. mamorensis	uncertain
PI 483363	CPYR_75.002	Pyrus communis	Beurré Easter	-0.0214223	-0.0184649	0.00537365	-0.0153666	Communis	Occidental	Admixed_Communis	P. communis F
PI 541582	CPYR_752.001	Pyrus cordata	P. cordata - France	-0.00783805	0.0332819	-0.0135591	0.0256605	Group1	Occidental	Admixed_Group1	P. mamorensis	uncertain
PI 316552	CPYR_753.001	Pyrus cossonii	P. cossonii - Netherlands	-0.0180247	0.00354355	-0.00345823	0.000808219	Communis	Occidental	Admixed	P. communis E	Pyrus communis hybrid
PI 541610	CPYR_757.001	Pyrus dimorphophylla	P. dimorphophylla 408	0.0417577	-0.00828581	-0.0201214	-0.00146408	Group3	Oriental	P. dimorphopylla & fauriei	-
PI 541731	CPYR_759.001	Pyrus hybrid	P. dimorphophylla x P. calleryana	0.0431447	-0.00965221	-0.0239482	-0.000965412	Group3	Oriental	P. dimorphopylla & fauriei	-	Pyrus dimorphophylla/fauriei
PI 541143	CPYR_76.002	Pyrus communis	Beurré Fouqueray	-0.0206516	-0.0141055	0.00303892	-0.0131061	Communis	Occidental	Admixed_Communis	P. communis F
PI 541732	CPYR_760.001	Pyrus hybrid	P. dimorphophylla x P. calleryana	0.0462499	-0.0177424	-0.0285529	0.00272528	Group3	Oriental	Admixed_Group3	-
PI 541733	CPYR_761.001	Pyrus hybrid	P. dimorphophylla x P. calleryana	0.0467421	-0.0176917	-0.0283247	0.0029082	Group3	Oriental	Admixed_Group3	-
PI 541734	CPYR_762.001	Pyrus hybrid	P. dimorphophylla x P. fauriei	0.0431884	-0.00982191	-0.0240425	-0.00108263	Group3	Oriental	P. dimorphopylla & fauriei	-	Pyrus dimorphophylla/fauriei
PI 541735	CPYR_763.001	Pyrus hybrid	P. dimorphophylla x P. fauriei W-6	0.0434881	-0.0095532	-0.0227431	-0.000558511	Group3	Oriental	P. dimorphopylla & fauriei	-	Pyrus dimorphophylla/fauriei
PI 541617	CPYR_765.001	Pyrus elaeagrifolia	P. elaeagrifolia MSU6768	-0.00708423	0.0638372	-0.0253492	-0.0519835	Group2	Occidental	P. elaeagrifolia	P. elaeagrifolia & syriaca
PI 541721	CPYR_767.001	Pyrus hybrid	P. elaeagrifolia Olez 3 (hybrid) - Turkey	-0.0131179	0.0330662	-0.0144298	-0.0155167	Communis/Group1	Occidental	Admixed	P. elaeagrifolia & syriaca
PI 541613	CPYR_768.001	Pyrus elaeagrifolia	P. elaeagrifolia Olez 2 - Turkey	-0.00678013	0.0594125	-0.0233769	-0.0484926	Group2	Occidental	P. elaeagrifolia	P. elaeagrifolia & syriaca
PI 541614	CPYR_769.001	Pyrus elaeagrifolia	P. elaeagrifolia Olez 2 - Turkey	-0.00704061	0.0608244	-0.0242876	-0.0503852	Group2	Occidental	P. elaeagrifolia	P. elaeagrifolia & syriaca
PI 541144	CPYR_77.002	Pyrus communis	Beurré Giffard	-0.0223092	-0.0213082	0.00701555	-0.00542605	Communis	Occidental	Admixed_Communis	P. communis J
PI 541615	CPYR_770.001	Pyrus elaeagrifolia	P. elaeagrifolia WB-4 - Turkey	-0.00658413	0.0600027	-0.0238379	-0.0461587	Group2	Occidental	P. elaeagrifolia	P. elaeagrifolia & syriaca
PI 541616	CPYR_771.001	Pyrus elaeagrifolia	P. elaeagrifolia WB-5 - Turkey	-0.00665465	0.059375	-0.0236828	-0.0476584	Group2	Occidental	P. elaeagrifolia	P. elaeagrifolia & syriaca
PI 617507	CPYR_776.001	Pyrus fauriei	P. fauriei MSU5768	0.0430674	-0.00489606	-0.00965148	-0.000538069	Group3	Oriental	P. dimorphopylla & fauriei	-
PI 541634	CPYR_777.001	Pyrus fauriei	P. fauriei No. 5	0.0424604	-0.010811	-0.02679	-0.00118846	Group3	Oriental	P. dimorphopylla & fauriei	-
PI 541635	CPYR_778.001	Pyrus fauriei	P. fauriei OSU 69	0.0427765	-0.0102021	-0.0239892	-0.00102906	Group3	Oriental	P. dimorphopylla & fauriei	-
PI 541633	CPYR_779.001	Pyrus fauriei	P. fauriei No. 4	0.0427142	-0.0103869	-0.0257682	-0.00110138	Group3	Oriental	P. dimorphopylla & fauriei	-
PI 541145	CPYR_78.002	Pyrus communis	Beurré Gris	-0.0194077	-0.00528277	-0.000224916	-0.00410979	Communis	Occidental	Admixed_Communis	P. communis E
PI 541637	CPYR_780.001	Pyrus fauriei	P. fauriei No. 4	0.0427684	-0.00969779	-0.0216042	-0.000310494	Group3	Oriental	P. dimorphopylla & fauriei	-
PI 541737	CPYR_781.007	Pyrus hybrid	P. betulifolia hybrid OP seedling	0.0466098	-0.0110996	-0.0112962	-0.000829444	between Group3 and 4	Oriental	Admixed	-
PI 541738	CPYR_783.001	Pyrus hybrid	P. fauriei x P. betulifolia-1	0.0466164	-0.0245522	-0.0529622	-0.00482013	Group3	Oriental	Admixed_Group3	-
PI 541739	CPYR_784.001	Pyrus hybrid	P. fauriei x P. betulifolia-1	0.0457366	-0.0233663	-0.0505623	-0.00420358	Group3	Oriental	Admixed_Group3	-
PI 541146	CPYR_79.002	Pyrus communis	Beurré Gris d'Hiver Nouveau	-0.0230724	-0.0278032	0.00905315	-0.0196754	Communis	Occidental	Admixed_Communis	P. communis D
PI 541664	CPYR_790.001	Pyrus gharbiana	P. gharbiana No. 4	-0.0130652	0.0286644	-0.0135506	0.0094578	Group1	Occidental	Admixed	P. communis E	uncertain
PI 541666	CPYR_794.001	Pyrus gharbiana	P. gharbiana	-0.00808508	0.0406747	-0.0175612	0.00924772	Group1	Occidental	Admixed_Group1	P. mamorensis	uncertain
PI 541671	CPYR_798.001	Pyrus hondoensis	P. hondoensis No. 1	0.0349331	0.0230505	0.040108	-0.000846146	Group4	Oriental	P. ussuriensis	-	Pyrus ussuriensis
PI 541674	CPYR_800.001	Pyrus hondoensis	P. hondoensis	0.0346037	0.0229651	0.0397836	-0.00123908	Group4	Oriental	P. ussuriensis	-	Pyrus ussuriensis
PI 541675	CPYR_801.001	Pyrus hondoensis	P. hondoensis	0.0348951	0.0226548	0.0392994	-0.00125382	Group4	Oriental	P. ussuriensis	-	Pyrus ussuriensis
PI 541676	CPYR_803.001	Pyrus hondoensis	P. hondoensis	0.0421887	0.00533214	0.014253	-0.00281454	Group4	Oriental	Admixed	-	Pyrus hybrid
PI 541677	CPYR_806.002	Pyrus hondoensis	P. hondoensis	0.0308844	0.0190872	0.0378997	-0.0023422	Group4	Oriental	P. ussuriensis	-	Pyrus ussuriensis
PI 541678	CPYR_807.001	Pyrus hondoensis	P. hondoensis	0.0342288	0.022257	0.0378346	-0.000938688	Group4	Oriental	P. ussuriensis	-	Pyrus ussuriensis
PI 541825	CPYR_808.001	Pyrus koehnei	P. koehnei	0.0435774	-0.0229043	-0.0263849	0.00262824	Group3	Oriental	P. calleryana & koehnei	-
PI 541826	CPYR_809.001	Pyrus koehnei	P. koehnei	0.0471286	-0.0226838	-0.0328021	0.00469562	Group3	Oriental	P. calleryana & koehnei	-
PI 541827	CPYR_812.001	Pyrus koehnei	P. koehnei	0.0482789	-0.0238025	-0.0347284	0.00535917	Group3	Oriental	P. calleryana & koehnei	-
PI 541828	CPYR_813.001	Pyrus koehnei	P. koehnei	0.0474784	-0.0232102	-0.0347172	0.00500703	Group3	Oriental	P. calleryana & koehnei	-
PI 541829	CPYR_815.001	Pyrus koehnei	P. koehnei	0.0487952	-0.0241229	-0.0350668	0.00510043	Group3	Oriental	P. calleryana & koehnei	-
PI 541834	CPYR_820.001	Pyrus koehnei	P. koehnei hybrid	0.0467471	-0.0112912	-0.00709679	0.00396994	between Group3 and 4	Oriental	Admixed	-	Pyrus hybrid
PI 541834	CPYR_825.001	Pyrus koehnei	P. koehnei	0.0479593	-0.0242789	-0.0360178	0.00530446	Group3	Oriental	P. calleryana & koehnei	-
PI 307539	CPYR_83.002	Pyrus communis	Beurré Inflancka	-0.0197949	-0.0025006	-0.00196733	0.0168385	Communis	Occidental	Admixed	P. communis E	Pyrus communis hybrid
PI 541592	CPYR_830.001	Pyrus cossonii	P. cossonii - Russia	-0.0122125	0.0270675	-0.0125173	0.0299158	Group1	Occidental	Admixed	P. communis hybrid	uncertain
PI 541843	CPYR_834.001	Pyrus mamorensis	P. mamorensis - Morocco	-0.00570379	0.0486201	-0.0190633	0.00952744	Group1	Occidental	P. cordata & mamorensis	P. mamorensis
PI 541846	CPYR_837.001	Pyrus mamorensis	P. mamorensis - Morocco	-0.00584673	0.0476875	-0.0187064	0.00939255	Group1	Occidental	P. cordata & mamorensis	P. mamorensis
PI 280030	CPYR_84.003	Pyrus communis	Beurré Jean van Geert	-0.0224419	-0.0216226	0.00599377	-0.00708342	Communis	Occidental	Admixed_Communis	P. communis E
PI 541848	CPYR_842.001	Pyrus mamorensis	P. mamorensis - Morocco	-0.00583873	0.0489309	-0.0191288	0.00952886	Group1	Occidental	P. cordata & mamorensis	P. mamorensis
PI 541849	CPYR_844.001	Pyrus mamorensis	P. mamorensis - Morocco	-0.00586234	0.0497966	-0.019466	0.010826	Group1	Occidental	P. cordata & mamorensis	P. mamorensis
PI 541851	CPYR_846.001	Pyrus mamorensis	P. mamorensis - Morocco	-0.00579127	0.0493128	-0.0192402	0.0100914	Group1	Occidental	P. cordata & mamorensis	P. mamorensis
PI 541148	CPYR_86.002	Pyrus communis	Beurré Millet	-0.0211626	-0.0164293	0.00364989	-0.00398122	Communis	Occidental	Admixed_Communis	P. communis J
PI 312145	CPYR_860.003	Pyrus nivalis	P. nivalis	-0.0132847	0.0302912	-0.0133798	-0.0136273	Group1	Occidental	Admixed	P. communis E
PI 541860	CPYR_862.001	Pyrus nivalis	P. nivalis No. 2	-0.0162065	0.0150377	-0.00830326	-0.00530961	Communis	Occidental	Admixed	P. communis E	Pyrus hybrid
PI 541861	CPYR_863.001	Pyrus nivalis	P. nivalis	-0.0114021	0.0396783	-0.0168245	-0.0346048	Group1	Occidental	Admixed_Group1	P. elaeagrifolia & syriaca	Pyrus hybrid
PI 541862	CPYR_864.001	Pyrus nivalis	P. nivalis	-0.0132895	0.0342025	-0.0154817	-0.0247435	Group1	Occidental	Admixed	P. communis A
PI 541745	CPYR_866.001	Pyrus nivalis	P. nivalis (hybrid) - Yugoslavia - compact habit	-0.0196803	-0.0100917	0.00214438	-0.00813289	Communis	Occidental	Admixed_Communis	P. communis G	Pyrus communis hybrid
PI 215325	CPYR_87.003	Pyrus communis	Beurré de Mortillet	-0.0240834	-0.0340062	0.0110042	-0.0185609	Communis	Occidental	Admixed_Communis	P. communis J
PI 541896	CPYR_875.001	Pyrus pseudopashia	P. pseudopashia [P. pashia Kansu?]	0.0387432	0.0101708	0.0188833	0.000315377	Group4	Oriental	Admixed	-	Pyrus hybrid
PI 542037	CPYR_880.001	Pyrus ×phaeocarpa	P. x phaeocarpa	0.0484206	-0.0127963	-0.0115826	-0.00210504	between Group3 and 4	Oriental	Admixed	-	Pyrus hybrid
PI 541567	CPYR_881.001	Pyrus communis subsp. pyraster	P. communis ssp. pyraster No. 9	-0.0162359	0.0132656	-0.00841403	0.0381853	Communis	Occidental	Admixed	P. communis hybrid	Pyrus communis hybrid
PI 377611	CPYR_883.001	Pyrus communis subsp. pyraster	P. communis ssp. pyraster - Macedonia	-0.0192409	0.00582607	-0.00552055	0.0185412	Communis	Occidental	P. communis pyraster	P. communis pyraster
PI 235575	CPYR_884.002	Pyrus pyrifolia	P. pyrifolia No. 579	0.0463128	0.00684472	0.042336	0.00391202	Group4	Oriental	P. pyrifolia & ×sinkiangensis	-
PI 420808	CPYR_885.001	Pyrus pyrifolia	P. pyrifolia - Thailand	0.0452185	0.00783817	0.0441129	0.00213986	Group4	Oriental	P. pyrifolia & ×sinkiangensis	-
PI 358953	CPYR_886.001	Pyrus pyrifolia	HN-36 P. pyrifolia (Virus Indicator)	0.0466473	0.0175171	0.070688	0.00466824	Group4	Oriental	P. pyrifolia & ×sinkiangensis	-
PI 358954	CPYR_887.001	Pyrus pyrifolia	HN-39 P. pyrifolia (Virus Indicator)	0.046701	0.0171315	0.070672	0.00428645	Group4	Oriental	P. pyrifolia & ×sinkiangensis	-
PI 541944	CPYR_889.001	Pyrus regelii	P. regelii No. 3 (hybrid)	0.00671438	0.040617	-0.0109896	-0.0107354	between European and Asian	Admixed	P. regelii	-
PI 541945	CPYR_890.001	Pyrus regelii	P. regelii	0.00671783	0.0427487	-0.0119175	-0.0119704	between European and Asian	Admixed	P. regelii	-
PI 541948	CPYR_891.001	Pyrus salicifolia	P. salicifolia No. 1	-0.00653896	0.0724985	-0.0293123	-0.00696399	Group2	Occidental	Group2	P. salicifolia & sachokiana
PI 541951	CPYR_893.001	Pyrus salicifolia	Pendula	-0.00621037	0.0667759	-0.0279788	0.00211596	Group2	Occidental	Group2	P. salicifolia & sachokiana
PI 541899	CPYR_895.001	Pyrus pyrifolia	P. pyrifolia	0.0460176	0.0082168	0.0433527	0.00392369	Group4	Oriental	P. pyrifolia & ×sinkiangensis	-
PI 541746	CPYR_898.001	Pyrus hybrid	P. serrulata x P. heterophylla	0.0267094	0.0208484	0.00320322	-0.00353673	between European and Asian, but closer to Group4	Oriental	Admixed	-
PI 322710	CPYR_902.001	Pyrus communis	P. communis - Ukraine	0.0141806	-0.0175322	-0.0380441	0.0013082	between European and Asian	Admixed	US Oregon	-	Pyrus hybrid
PI 322711	CPYR_903.001	Pyrus communis	B-37 (P. communis) - Ukraine	-0.0235887	-0.0346296	0.0120832	-0.020425	Communis	Occidental	Admixed_Communis	P. communis J
PI 312154	CPYR_904.002	Pyrus hybrid	P. elaeagrifolia (hybrid) - Hungary	-0.0125855	0.035363	-0.0149823	-0.022339	Group1	Occidental	Admixed	P. elaeagrifolia & syriaca
PI 541914	CPYR_905.001	Pyrus pyrifolia	P. pyrifolia hybrid - Afghanistan	0.023869	0.0166887	0.0344472	0.000786589	between European and Asian- but close to Group4	Admixed	Central-South Asia	-	Pyrus hybrid
PI 541974	CPYR_907.001	Pyrus syriaca	P. syriaca - Israel	-0.00313511	0.0678428	-0.0259915	-0.0504565	Group2	Occidental	Admixed_Group1	P. elaeagrifolia & syriaca
PI 541975	CPYR_908.001	Pyrus syriaca	P. syriaca No. 1 - Israel	-0.00340873	0.0672257	-0.0259784	-0.0498883	Group2	Occidental	Admixed_Group1	P. elaeagrifolia & syriaca
PI 541975	CPYR_909.001	Pyrus syriaca	P. syriaca No. 1 - Israel	-0.00328681	0.0669075	-0.0255937	-0.0497112	Group2	Occidental	Admixed_Group1	P. elaeagrifolia & syriaca
PI 307540	CPYR_91.003	Pyrus communis	Beurré Slucka	-0.0181463	0.00628363	-0.00498517	0.0148798	Communis	Occidental	Admixed	P. communis E	Pyrus communis hybrid
PI 541976	CPYR_912.001	Pyrus syriaca	P. syriaca Mayron B - Israel	-0.00321058	0.0674493	-0.0258717	-0.0501643	Group2	Occidental	Admixed_Group1	P. elaeagrifolia & syriaca
PI 541976	CPYR_913.001	Pyrus syriaca	P. syriaca - Israel	-0.00326184	0.0672215	-0.0261853	-0.0498054	Group2	Occidental	Admixed_Group1	P. elaeagrifolia & syriaca
PI 541977	CPYR_914.001	Pyrus syriaca	P. syriaca No. 2 - Israel	-0.0031946	0.0680641	-0.0262812	-0.0502569	Group2	Occidental	Admixed_Group1	P. elaeagrifolia & syriaca
PI 541977	CPYR_915.001	Pyrus syriaca	P. syriaca No. 2 - Israel	-0.00321082	0.0682421	-0.0259908	-0.0504247	Group2	Occidental	Admixed_Group1	P. elaeagrifolia & syriaca
PI 541977	CPYR_916.001	Pyrus syriaca	P. syriaca No. 2 - Israel	-0.00325145	0.0679184	-0.0259985	-0.0502725	Group2	Occidental	Admixed_Group1	P. elaeagrifolia & syriaca
PI 312149	CPYR_920.001	Pyrus syriaca	P. syriaca - Armenia	-0.00575736	0.0681164	-0.0277834	0.000278192	Group2	Occidental	Group2	P. salicifolia & sachokiana	Pyrus salicifolia
PI 617510	CPYR_921.001	Pyrus betulifolia	P. betulifolia	0.0466145	-0.0237829	-0.0508601	-0.00442442	Group3	Oriental	Admixed_Group3	-	Pyrus hybrid
PI 617511	CPYR_922.001	Pyrus hybrid	P. hybrid	-0.00286873	-0.00995699	0.0181373	-0.007249	between European and Asian	Admixed	North US-Canada	-
PI 542009	CPYR_924.001	Pyrus ussuriensis	P. ussuriensis - China	0.0345495	0.0268234	0.047609	-0.00263857	Group4	Oriental	P. ussuriensis	-
PI 318874	CPYR_925.001	Pyrus hondoensis	P. hondoensis - Aonashi	0.0419986	0.00638002	0.0161478	-0.002769	Group4	Oriental	Admixed	-	Pyrus hybrid
PI 312150	CPYR_927.001	Pyrus ussuriensis	P. ussuriensis - Alma-ata	0.0342081	0.0279957	0.0486741	-0.00267956	Group4	Oriental	P. ussuriensis	-
PI 312151	CPYR_928.001	Pyrus ussuriensis	P. ussuriensis - Tashkent	0.0339106	0.0277898	0.0469152	-0.00267613	Group4	Oriental	P. ussuriensis	-
PI 312152	CPYR_929.001	Pyrus ussuriensis	P. ussuriensis - Tajikistan	0.0339628	0.0276478	0.0480215	-0.00252491	Group4	Oriental	P. ussuriensis	-
PI 313938	CPYR_931.001	Pyrus ussuriensis	P. ussuriensis (hybrid?)	0.0395518	0.0120984	0.0359734	0.000291715	Group4	Oriental	Admixed	-	Pyrus pyrifolia/ussuriensis hybrid
PI 313939	CPYR_932.001	Pyrus ×uyematsuana	P. x uyematsuana	0.0452516	0.0030659	0.0217828	0.0020997	between Group3 and 4	Oriental	Admixed	-	Pyrus hybrid
PI 325928	CPYR_940.001	Pyrus dimorphophylla	P. dimorphophylla Vo 27 - Japan	0.0418309	-0.00805485	-0.021785	-0.00141194	Group3	Oriental	P. dimorphopylla & fauriei	-
PI 325929	CPYR_941.001	Pyrus dimorphophylla	P. dimorphophylla Vo 28 - Japan	0.0422407	-0.00829446	-0.0209837	-0.00114005	Group3	Oriental	P. dimorphopylla & fauriei	-
PI 325932	CPYR_943.001	Pyrus dimorphophylla	P. dimorphophylla Vo 32 - Japan	0.0425466	-0.00859894	-0.0224132	-0.00170238	Group3	Oriental	P. dimorphopylla & fauriei	-
PI 541151	CPYR_95.001	Pyrus communis	Blakeney Red	-0.0176629	0.00629013	-0.00467298	-0.00348059	Communis	Occidental	Admixed	P. communis E
PI 541152	CPYR_97.004	Pyrus communis	Bon Chretien Bonnamour	-0.0231849	-0.0278766	0.0088933	-0.0155022	Communis	Occidental	Admixed_Communis	P. communis A
PI 541866	CPYR_970.001	Pyrus nivalis	P. nivalis - United Kingdom	-0.0130901	0.0320511	-0.0140802	-0.0128873	Group1	Occidental	Admixed	P. communis D
PI 541866	CPYR_970.002	Pyrus nivalis	P. nivalis - United Kingdom	-0.0184576	0.000702492	-0.00293607	-0.00175411	Communis	Occidental	Admixed	P. communis E	Pyrus communis hybrid
PI 255609	CPYR_98.003	Pyrus communis	Bon Chretien d'Hiver	-0.0178717	0.00278901	-0.00299149	-0.0161275	Communis	Occidental	Admixed	P. communis E
PI 377614	CPYR_984.002	Pyrus communis subsp. pyraster	P. communis ssp. pyraster - Macedonia	-0.015869	0.0153171	-0.0088174	0.0319769	Communis	Occidental	Admixed	P. communis hybrid	Pyrus communis hybrid
PI 377614	CPYR_984.004	Pyrus communis subsp. pyraster	P. communis ssp. pyraster - Macedonia	-0.0165463	0.0115242	-0.00767102	0.0349514	Communis	Occidental	Admixed	P. communis hybrid	Pyrus communis hybrid
PI 369881	CPYR_986.001	Pyrus communis subsp. pyraster	P. communis ssp. pyraster - Macedonia	-0.019141	0.00605961	-0.00553547	0.0165673	Communis	Occidental	P. communis pyraster	P. communis pyraster
PI 349026	CPYR_989.001	Pyrus communis subsp. pyraster	P. communis ssp. pyraster - Macedonia	-0.0191597	0.0060194	-0.0055092	0.018142	Communis	Occidental	P. communis pyraster	P. communis pyraster
PI 349026	CPYR_989.006	Pyrus communis subsp. pyraster	P. communis ssp. pyraster (foliage mutant) - Macedonia	-0.01856	0.00790238	-0.00633255	0.0190364	Communis	Occidental	P. communis pyraster	P. communis pyraster
PI 349027	CPYR_991.002	Pyrus communis subsp. pyraster	P. communis ssp. pyraster - Macedonia	-0.0136469	0.0309925	-0.0148915	0.00682595	Communis	Occidental	Admixed	P. communis hybrid	Pyrus hybrid
PI 349028	CPYR_993.001	Pyrus communis subsp. pyraster	P. communis ssp. pyraster - Macedonia	-0.0156823	0.0149565	-0.00910256	0.0401377	Communis	Occidental	Admixed	P. communis hybrid	Pyrus communis hybrid
-	DH(DoubleHaploid)	Pyrus communis	DH sequenced	-0.0255811	-0.0465017	0.01677	-0.0209831	Communis	Occidental	Communis A	P. communis J
-	Illinois76	Pyrus ussuriensis x pyrifolia	Illinois 76	0.0489063	-0.0204251	-0.0244928	0.00599331	Group3	Oriental	P. calleryana & koehnei	-	Pyrus calleryana
-	Moonglow	Pyrus communis	Moonglow	-0.023046	-0.0268008	0.0083805	-0.012388	Communis	Occidental	Admixed_Communis	P. communis D
-	NJ487601193	(Pyrus ussuriensis x Pyrus pyrifolia) x Pyrus communis	NJ487601193	0.0459519	0.0153195	0.0585889	0.00286306	Group4	Oriental	P. pyrifolia & ×sinkiangensis	-	Pyrus pyrifolia
-	NJA2R59T69	Pyrus hybrid	NJA2R59T69	0.0104552	-0.0107036	0.0360716	-0.0060106	between European and Asian	Admixed	Admixed	-
-	NJB9R1T117	Pyrus communis x Pyrus ussuriensis	NJB9R1T117	-0.00936965	-0.0173368	0.0184538	-0.00610586	between European and Asian- but close to Communis	Occidental	Admixed_Communis	P. communis F	Pyrus communis
-	p01	Pyrus communis	PÉR_MAŽUCH	-0.0159315	0.0166973	-0.00825202	-0.0167792	Communis	Occidental	Admixed	P. communis E	Pyrus hybrid
-	p02	Pyrus communis	PÉR_TEMPORIVO	-0.0167985	0.0113598	-0.00686192	0.015722	Communis	Occidental	Admixed	P. communis E	Pyrus communis hybrid
-	p04	Pyrus communis	PÉR_ŽUCHERIN	-0.0186381	0.00742509	-0.00612611	0.0173297	Communis	Occidental	Admixed	P. communis E	Pyrus communis hybrid
-	p05	Pyrus communis	PÉR_STUER	-0.0191174	-0.00121233	-0.00170678	0.00718931	Communis	Occidental	Admixed	P. communis E
-	p06	Pyrus communis	PÉR_DE_LA_REGINA	-0.0180439	0.00226807	-0.00326993	-0.00535018	Communis	Occidental	Admixed	P. communis E
-	p08	Pyrus communis	PÉR_MOSCATO	-0.0181901	0.00838179	-0.00695056	0.0333124	Communis	Occidental	Admixed	P. communis hybrid	Pyrus communis hybrid
-	P0176	Pyrus communis	Bergamotte de Hollande	-0.0192618	-0.000993233	-0.0018684	0.00121221	Communis	Occidental	Admixed	P. communis E
-	P2661	Pyrus communis	Angélys	-0.0216026	-0.0204731	0.0059905	-0.012664	Communis	Occidental	Admixed_Communis	P. communis F
-	P2751	Pyrus hybrid	NY 10352	-0.00708469	-0.0188222	0.0191624	-0.015076	between European and Asian	Occidental	Admixed	P. communis E
-	P2795	Pyrus hybrid	Euras	-0.00640087	-0.0129433	0.0216236	-0.0137718	between European and Asian	Occidental	Admixed	P. communis F
-	P3480	Pyrus hybrid	PCR13A5 (hybride INRA (Pierre corneille x Wilder))	-0.0224058	-0.0232732	0.00670187	-0.0131546	Communis	Occidental	Admixed_Communis	P. communis J	Pyrus communis
-	US76128-009	Pyrus communis	US76128-009	-0.02109	-0.020714	0.00688084	-0.0146634	Communis	Occidental	Admixed_Communis	P. communis F
-	US82720-002	Pyrus communis	US82720-002	-0.0219579	-0.0200396	0.00560856	-0.00768764	Communis	Occidental	Admixed_Communis	P. communis J
-	US-Michigan437	Pyrus communis	US-Michigan 437	-0.023509	-0.0312206	0.0107229	-0.0150471	Communis	Occidental	Admixed_Communis	P. communis J
